# Supplementary material for: Heronamides G–L, polyene macrolactams from Streptomyces niveus
Source: Royal Society of Chemistry journal article supplement (doi:10.1039/c8ra02167h), 2018-01-01
Supplement: c8ra02167h1.pdf [file c8ra02167h1.pdf]

## Supporting Information

### **Heronamides G-L, polyene macrolactams from *Streptomyces niveus* isolated from Great Khingan Mountains soil**

Nan Ding,<sup>a</sup> Li Han,<sup>\*a</sup> Yi Jiang,<sup>b</sup> Guiding Li,<sup>b</sup> Zehui Zheng,<sup>a</sup> Bixuan Cao,<sup>a</sup> Peipei Guan,<sup>a</sup> Yu Mu,<sup>a</sup> Bin Lin<sup>c</sup> and Xueshi Huang<sup>\*a</sup>

<sup>a</sup>Institute of Microbial Pharmaceuticals, College of Life and Health Sciences, Northeastern University, Shenyang 110819, People's Republic of China

<sup>b</sup>Yunnan Institute of Microbiology, Yunnan University, Kunming 650091, People's Republic of China

<sup>c</sup>School of Pharmaceutical Engineering, Shenyang Pharmaceutical University, Shenyang 110016, People's Republic of China

\*Corresponding authors

Tel: 86-24-83656106. Fax: 86-24-83656106. E-mail: [huangxs@mail.neu.edu.cn](mailto:huangxs@mail.neu.edu.cn) (X. Huang);

Tel: 86-24-83656122. Fax: 86-24-83656122. E-mail: [hanli@mail.neu.edu.cn](mailto:hanli@mail.neu.edu.cn) (L. Han).

## Table of Contents

|                                                                                                             |    |
|-------------------------------------------------------------------------------------------------------------|----|
| Computational details for ECD calculations .....                                                            | 5  |
| Figure S1. HRESIMS spectrum of compound <b>1</b> .....                                                      | 19 |
| Figure S2. IR spectrum of compound <b>1</b> .....                                                           | 20 |
| Figure S3. <sup>1</sup> H NMR (600 MHz, DMSO- <i>d</i> <sub>6</sub> ) spectrum of compound <b>1</b> .....   | 21 |
| Figure S4. <sup>13</sup> C NMR (150 MHz, DMSO- <i>d</i> <sub>6</sub> ) spectrum of compound <b>1</b> .....  | 22 |
| Figure S5. HSQC spectrum of compound <b>1</b> .....                                                         | 23 |
| Figure S6. HMBC spectrum of compound <b>1</b> .....                                                         | 24 |
| Figure S7. COSY spectrum of compound <b>1</b> .....                                                         | 25 |
| Figure S8. NOESY spectrum of compound <b>1</b> .....                                                        | 26 |
| Figure S9. HRESIMS spectrum of compound <b>2</b> .....                                                      | 27 |
| Figure S10. IR spectrum of compound <b>2</b> .....                                                          | 28 |
| Figure S11. <sup>1</sup> H NMR (600 MHz, DMSO- <i>d</i> <sub>6</sub> ) spectrum of compound <b>2</b> .....  | 29 |
| Figure S12. <sup>13</sup> C NMR (150 MHz, DMSO- <i>d</i> <sub>6</sub> ) spectrum of compound <b>2</b> ..... | 30 |
| Figure S13. HSQC spectrum of compound <b>2</b> .....                                                        | 31 |
| Figure S14. HMBC spectrum of compound <b>2</b> .....                                                        | 32 |
| Figure S15. COSY spectrum of compound <b>2</b> .....                                                        | 33 |
| Figure S16. NOESY spectrum of compound <b>2</b> .....                                                       | 34 |
| Figure S17. HRESIMS spectrum of compound <b>3</b> .....                                                     | 35 |
| Figure S18. IR spectrum of compound <b>3</b> .....                                                          | 36 |
| Figure S19. <sup>1</sup> H NMR (600 MHz, DMSO- <i>d</i> <sub>6</sub> ) spectrum of compound <b>3</b> .....  | 37 |
| Figure S20. <sup>13</sup> C NMR (150 MHz, DMSO- <i>d</i> <sub>6</sub> ) spectrum of compound <b>3</b> ..... | 38 |
| Figure S21. HSQC spectrum of compound <b>3</b> .....                                                        | 39 |
| Figure S22. HMBC spectrum of compound <b>3</b> .....                                                        | 40 |
| Figure S23. COSY spectrum of compound <b>3</b> .....                                                        | 41 |
| Figure S24. NOESY spectrum of compound <b>3</b> .....                                                       | 42 |

|                                                                                                             |    |
|-------------------------------------------------------------------------------------------------------------|----|
| Figure S25. HRESIMS spectrum of compound <b>4</b> .....                                                     | 43 |
| Figure S26. IR spectrum of compound <b>4</b> .....                                                          | 44 |
| Figure S27. <sup>1</sup> H NMR (600 MHz, DMSO- <i>d</i> <sub>6</sub> ) spectrum of compound <b>4</b> .....  | 45 |
| Figure S28. <sup>13</sup> C NMR (150 MHz, DMSO- <i>d</i> <sub>6</sub> ) spectrum of compound <b>4</b> ..... | 46 |
| Figure S29. HSQC spectrum of compound <b>4</b> .....                                                        | 47 |
| Figure S30. HMBC spectrum of compound <b>4</b> .....                                                        | 48 |
| Figure S31. COSY spectrum of compound <b>4</b> .....                                                        | 49 |
| Figure S32. NOESY spectrum of compound <b>4</b> .....                                                       | 50 |
| Figure S33. HRESIMS spectrum of compound <b>5</b> .....                                                     | 51 |
| Figure S34. IR spectrum of compound <b>5</b> .....                                                          | 52 |
| Figure S35. <sup>1</sup> H NMR (600 MHz, DMSO- <i>d</i> <sub>6</sub> ) spectrum of compound <b>5</b> .....  | 53 |
| Figure S36. <sup>13</sup> C NMR (150 MHz, DMSO- <i>d</i> <sub>6</sub> ) spectrum of compound <b>5</b> ..... | 54 |
| Figure S37. HSQC spectrum of compound <b>5</b> .....                                                        | 55 |
| Figure S38. HMBC spectrum of compound <b>5</b> .....                                                        | 56 |
| Figure S39. COSY spectrum of compound <b>5</b> .....                                                        | 57 |
| Figure S40. NOESY spectrum of compound <b>5</b> .....                                                       | 58 |
| Figure S41. HRESIMS spectrum of compound <b>6</b> .....                                                     | 59 |
| Figure S42. IR spectrum of compound <b>6</b> .....                                                          | 60 |
| Figure S43. <sup>1</sup> H NMR (600 MHz, DMSO- <i>d</i> <sub>6</sub> ) spectrum of compound <b>6</b> .....  | 61 |
| Figure S44. <sup>13</sup> C NMR (150 MHz, DMSO- <i>d</i> <sub>6</sub> ) spectrum of compound <b>6</b> ..... | 62 |
| Figure S45. HSQC spectrum of compound <b>6</b> .....                                                        | 63 |
| Figure S46. HMBC spectrum of compound <b>6</b> .....                                                        | 64 |
| Figure S47. COSY spectrum of compound <b>6</b> .....                                                        | 65 |
| Figure S48. NOESY spectrum of compound <b>6</b> .....                                                       | 66 |
| Figure S49. HRESIMS spectrum of compound <b>10</b> .....                                                    | 67 |
| Figure S50. IR spectrum of compound <b>10</b> .....                                                         | 68 |

|                                                                                                    |    |
|----------------------------------------------------------------------------------------------------|----|
| Figure S51. $^1\text{H}$ NMR (600 MHz, $\text{DMSO-}d_6$ ) spectrum of compound <b>10</b> .....    | 69 |
| Figure S52. $^{13}\text{C}$ NMR (150 MHz, $\text{DMSO-}d_6$ ) spectrum of compound <b>10</b> ..... | 70 |
| Figure S53. HSQC spectrum of compound <b>10</b> .....                                              | 71 |
| Figure S54. HMBC spectrum of compound <b>10</b> .....                                              | 72 |
| Figure S55. COSY spectrum of compound <b>10</b> .....                                              | 73 |

Computational details for ECD calculations

Compound **1**

The number of imaginary frequencies: 0

Energy: E(RB3LYP) = -1251.08406970

Cartesian Coordinates:

| Center<br>Number | Atomic<br>Number | Atomic<br>Type | Coordinates (Angstroms) |           |           |
|------------------|------------------|----------------|-------------------------|-----------|-----------|
|                  |                  |                | X                       | Y         | Z         |
| 1                | 6                | 0              | -0.106996               | 0.713665  | 0.520618  |
| 2                | 6                | 0              | -1.220481               | 1.049386  | -0.147503 |
| 3                | 6                | 0              | -2.636605               | 1.067005  | 0.368061  |
| 4                | 6                | 0              | -3.412805               | 2.270850  | -0.109359 |
| 5                | 6                | 0              | -4.665882               | 2.240487  | -0.554684 |
| 6                | 6                | 0              | -5.482442               | 0.984804  | -0.632552 |
| 7                | 1                | 0              | -6.485067               | 1.180535  | -0.230601 |
| 8                | 8                | 0              | -5.613435               | 0.611056  | -2.013869 |
| 9                | 6                | 0              | -4.859636               | -0.153488 | 0.187998  |
| 10               | 1                | 0              | -5.044848               | 0.056675  | 1.247510  |
| 11               | 8                | 0              | -5.574796               | -1.348197 | -0.171857 |
| 12               | 6                | 0              | -3.359316               | -0.276261 | -0.065723 |
| 13               | 6                | 0              | -2.666079               | -1.446384 | 0.608412  |
| 14               | 6                | 0              | -3.037759               | -1.792767 | 2.025800  |
| 15               | 6                | 0              | -1.569883               | -1.911228 | -0.016574 |
| 16               | 6                | 0              | -0.432530               | -2.614448 | 0.563280  |

|    |   |   |           |           |           |
|----|---|---|-----------|-----------|-----------|
| 17 | 6 | 0 | 0.833860  | -2.263969 | 0.284860  |
| 18 | 6 | 0 | 1.124694  | 0.347190  | -0.282538 |
| 19 | 1 | 0 | 1.067950  | 0.874850  | -1.238376 |
| 20 | 6 | 0 | 2.512833  | 0.655794  | 0.308632  |
| 21 | 1 | 0 | 2.534286  | 0.534261  | 1.396057  |
| 22 | 7 | 0 | 3.391251  | -0.324163 | -0.333170 |
| 23 | 6 | 0 | 4.767779  | 0.159231  | -0.549112 |
| 24 | 1 | 0 | 4.957993  | 0.146254  | -1.627116 |
| 25 | 6 | 0 | 5.817954  | -0.712179 | 0.144647  |
| 26 | 6 | 0 | 7.249468  | -0.248654 | -0.129998 |
| 27 | 6 | 0 | 4.691876  | 1.611690  | -0.024445 |
| 28 | 6 | 0 | 3.196852  | 1.980412  | -0.037501 |
| 29 | 1 | 0 | 2.892075  | 2.294417  | -1.042376 |
| 30 | 8 | 0 | 2.828691  | 2.975023  | 0.913052  |
| 31 | 6 | 0 | 2.749320  | -1.297699 | -1.008513 |
| 32 | 8 | 0 | 3.273605  | -2.134958 | -1.740905 |
| 33 | 1 | 0 | -1.143883 | 1.149504  | -1.229363 |
| 34 | 1 | 0 | -2.627588 | 1.100791  | 1.461541  |
| 35 | 1 | 0 | -2.888735 | 3.221292  | -0.065343 |
| 36 | 1 | 0 | -5.147886 | 3.155021  | -0.884460 |
| 37 | 1 | 0 | -5.977975 | -0.286999 | -2.007390 |
| 38 | 1 | 0 | -4.956222 | -2.088624 | -0.204324 |
| 39 | 1 | 0 | -2.399905 | -2.575887 | 2.432797  |
| 40 | 1 | 0 | -2.956530 | -0.922938 | 2.686134  |
| 41 | 1 | 0 | -4.073738 | -2.136414 | 2.096146  |
| 42 | 1 | 0 | -1.402769 | -1.539691 | -1.022679 |

|    |   |   |           |           |           |
|----|---|---|-----------|-----------|-----------|
| 43 | 1 | 0 | -0.598703 | -3.373312 | 1.321298  |
| 44 | 1 | 0 | 1.632654  | -2.774325 | 0.814189  |
| 45 | 1 | 0 | 5.620533  | -0.710205 | 1.221551  |
| 46 | 1 | 0 | 5.692706  | -1.741485 | -0.200116 |
| 47 | 1 | 0 | 7.427787  | 0.760851  | 0.247995  |
| 48 | 1 | 0 | 7.969266  | -0.913512 | 0.351502  |
| 49 | 1 | 0 | 7.463906  | -0.246560 | -1.202318 |
| 50 | 1 | 0 | 5.043773  | 1.655540  | 1.010187  |
| 51 | 1 | 0 | 5.295418  | 2.299232  | -0.616466 |
| 52 | 1 | 0 | 3.169550  | 3.827635  | 0.617509  |
| 53 | 6 | 0 | -0.021557 | 0.579805  | 2.017300  |
| 54 | 1 | 0 | 0.680144  | 1.316029  | 2.420489  |
| 55 | 1 | 0 | -0.977970 | 0.740481  | 2.510243  |
| 56 | 1 | 0 | 0.350390  | -0.405416 | 2.309212  |
| 57 | 6 | 0 | 1.251860  | -1.185882 | -0.696855 |
| 58 | 1 | 0 | 0.705462  | -1.328664 | -1.631099 |
| 59 | 1 | 0 | -3.220499 | -0.367741 | -1.147017 |

-----

**Compound 2**

The number of imaginary frequencies: 0

Energy: E(RB3LYP) = -1327.55896690

Cartesian Coordinates:

-----

| Center<br>Number | Atomic<br>Number | Atomic<br>Type | Coordinates (Angstroms) |   |   |
|------------------|------------------|----------------|-------------------------|---|---|
|                  |                  |                | X                       | Y | Z |

---

|    |   |   |           |           |           |
|----|---|---|-----------|-----------|-----------|
| 1  | 6 | 0 | -0.922069 | 2.098643  | -0.195998 |
| 2  | 6 | 0 | 0.400829  | 2.242867  | 0.511088  |
| 3  | 6 | 0 | 1.615384  | 2.043183  | -0.013935 |
| 4  | 6 | 0 | 2.837302  | 2.093445  | 0.772676  |
| 5  | 6 | 0 | 4.048371  | 1.643986  | 0.410286  |
| 6  | 6 | 0 | 4.419108  | 1.058083  | -0.918009 |
| 7  | 1 | 0 | 3.561319  | 1.042574  | -1.595692 |
| 8  | 8 | 0 | 5.475526  | 1.848922  | -1.518737 |
| 9  | 6 | 0 | 5.001266  | -0.363587 | -0.894702 |
| 10 | 1 | 0 | 5.415163  | -0.522201 | -1.897830 |
| 11 | 8 | 0 | 6.055172  | -0.509191 | 0.061183  |
| 12 | 6 | 0 | 4.001429  | -1.517844 | -0.694760 |
| 13 | 6 | 0 | 3.167079  | -1.544085 | 0.575169  |
| 14 | 6 | 0 | 3.890065  | -1.773925 | 1.872703  |
| 15 | 6 | 0 | 1.834616  | -1.386001 | 0.460337  |
| 16 | 6 | 0 | 0.865743  | -1.371941 | 1.543749  |
| 17 | 6 | 0 | -0.421875 | -0.999241 | 1.472067  |
| 18 | 6 | 0 | -1.176163 | -0.482443 | 0.280593  |
| 19 | 1 | 0 | -0.550733 | -0.527959 | -0.612531 |
| 20 | 6 | 0 | -1.744356 | 0.959971  | 0.475194  |
| 21 | 1 | 0 | -1.760003 | 1.169395  | 1.548195  |
| 22 | 6 | 0 | -3.213163 | 0.884129  | -0.004961 |
| 23 | 1 | 0 | -3.370176 | 1.476429  | -0.912002 |
| 24 | 7 | 0 | -3.463529 | -0.528604 | -0.266413 |
| 25 | 6 | 0 | -4.888689 | -0.896152 | -0.143273 |



|    |   |   |           |           |           |
|----|---|---|-----------|-----------|-----------|
| 26 | 1 | 0 | -4.950537 | -1.714299 | 0.580016  |
| 27 | 6 | 0 | -5.494297 | -1.366274 | -1.468150 |
| 28 | 6 | 0 | -6.951069 | -1.811984 | -1.332541 |
| 29 | 6 | 0 | -5.520163 | 0.397678  | 0.429952  |
| 30 | 6 | 0 | -4.341610 | 1.229422  | 0.970286  |
| 31 | 1 | 0 | -4.065837 | 0.891598  | 1.975818  |
| 32 | 8 | 0 | -4.562675 | 2.636048  | 0.974956  |
| 33 | 6 | 0 | -2.419611 | -1.344247 | -0.004478 |
| 34 | 8 | 0 | -2.462582 | -2.571047 | 0.011066  |
| 35 | 1 | 0 | 0.331736  | 2.483646  | 1.570787  |
| 36 | 1 | 0 | 1.702163  | 1.779937  | -1.061415 |
| 37 | 1 | 0 | 2.731854  | 2.492907  | 1.778702  |
| 38 | 1 | 0 | 4.864273  | 1.714337  | 1.121868  |
| 39 | 1 | 0 | 5.252225  | 2.781050  | -1.404121 |
| 40 | 1 | 0 | 6.790109  | 0.048289  | -0.223142 |
| 41 | 1 | 0 | 3.315591  | -1.474785 | -1.542893 |
| 42 | 1 | 0 | 4.544200  | -2.646425 | 1.800649  |
| 43 | 1 | 0 | 4.529368  | -0.920915 | 2.113349  |
| 44 | 1 | 0 | 3.210495  | -1.935922 | 2.706646  |
| 45 | 1 | 0 | 1.441960  | -1.227621 | -0.539317 |
| 46 | 1 | 0 | 1.220987  | -1.673858 | 2.523104  |
| 47 | 1 | 0 | -1.004353 | -1.043017 | 2.389157  |
| 48 | 1 | 0 | -5.414736 | -0.556044 | -2.200282 |
| 49 | 1 | 0 | -4.890809 | -2.195987 | -1.845693 |
| 50 | 1 | 0 | -7.595247 | -0.995187 | -0.998337 |
| 51 | 1 | 0 | -7.337157 | -2.165958 | -2.290499 |

|    |   |   |           |           |           |
|----|---|---|-----------|-----------|-----------|
| 52 | 1 | 0 | -7.047260 | -2.629263 | -0.612393 |
| 53 | 1 | 0 | -6.002457 | 0.968746  | -0.368285 |
| 54 | 1 | 0 | -6.268198 | 0.188275  | 1.194221  |
| 55 | 1 | 0 | -5.188830 | 2.850339  | 1.676648  |
| 56 | 8 | 0 | 4.726946  | -2.751014 | -0.853041 |
| 57 | 1 | 0 | 5.571831  | -2.643935 | -0.393627 |
| 58 | 6 | 0 | -0.798574 | 1.971754  | -1.717804 |
| 59 | 1 | 0 | -0.264120 | 2.831837  | -2.125706 |
| 60 | 1 | 0 | -0.256236 | 1.074134  | -2.021405 |
| 61 | 1 | 0 | -1.778429 | 1.941658  | -2.195890 |
| 62 | 1 | 0 | -1.489875 | 3.016087  | 0.010443  |

-----

**Compound 3**

The number of imaginary frequencies: 0

Energy: E(RB3LYP) = -1402.79456774

Cartesian Coordinates:

-----

| Center<br>Number | Atomic<br>Number | Atomic<br>Type | Coordinates (Angstroms) |           |           |
|------------------|------------------|----------------|-------------------------|-----------|-----------|
|                  |                  |                | X                       | Y         | Z         |
| 1                | 8                | 0              | 3.512190                | 2.584729  | -0.626720 |
| 2                | 6                | 0              | 3.099572                | 1.585913  | -0.022238 |
| 3                | 7                | 0              | 3.764313                | 0.398109  | -0.058849 |
| 4                | 6                | 0              | 3.210848                | -0.911594 | 0.399363  |
| 5                | 6                | 0              | 4.310576                | -1.915129 | 0.004292  |

-----

|    |   |   |           |           |           |
|----|---|---|-----------|-----------|-----------|
| 6  | 1 | 0 | 3.871566  | -2.876944 | -0.269128 |
| 7  | 8 | 0 | 5.157748  | -2.084951 | 1.149705  |
| 8  | 6 | 0 | 5.027434  | -1.251950 | -1.173370 |
| 9  | 6 | 0 | 4.989424  | 0.255807  | -0.878771 |
| 10 | 1 | 0 | 4.846167  | 0.826946  | -1.798206 |
| 11 | 6 | 0 | 6.228800  | 0.811789  | -0.159759 |
| 12 | 6 | 0 | 7.454966  | 0.900127  | -1.070093 |
| 13 | 1 | 0 | 3.135559  | -0.916147 | 1.485845  |
| 14 | 6 | 0 | 1.868989  | -1.179765 | -0.231639 |
| 15 | 6 | 0 | 0.730067  | -1.528633 | 0.394180  |
| 16 | 6 | 0 | 0.655608  | -1.915491 | 1.848563  |
| 17 | 6 | 0 | -0.525999 | -1.382806 | -0.348085 |
| 18 | 6 | 0 | -1.748837 | -1.310035 | 0.191939  |
| 19 | 6 | 0 | -2.972720 | -0.942118 | -0.592688 |
| 20 | 1 | 0 | -2.698355 | -0.988639 | -1.647205 |
| 21 | 6 | 0 | -3.642587 | 0.492832  | -0.409971 |
| 22 | 6 | 0 | -5.152525 | 0.203824  | -0.227923 |
| 23 | 1 | 0 | -5.406930 | 0.133365  | 0.831752  |
| 24 | 8 | 0 | -6.004260 | 1.155500  | -0.864540 |
| 25 | 6 | 0 | -5.379690 | -1.169855 | -0.857560 |
| 26 | 1 | 0 | -6.299966 | -1.640535 | -0.493400 |
| 27 | 8 | 0 | -5.403566 | -1.087887 | -2.281281 |
| 28 | 6 | 0 | -4.136603 | -1.948556 | -0.427284 |
| 29 | 1 | 0 | -3.980249 | -2.832549 | -1.051975 |
| 30 | 8 | 0 | -4.242766 | -2.326395 | 0.949052  |
| 31 | 1 | 0 | -3.549182 | 0.987570  | -1.379363 |

|    |   |   |           |           |           |
|----|---|---|-----------|-----------|-----------|
| 32 | 6 | 0 | -3.099259 | 1.545985  | 0.601908  |
| 33 | 8 | 0 | -4.019837 | 2.667208  | 0.391732  |
| 34 | 6 | 0 | -3.174261 | 1.135461  | 2.071174  |
| 35 | 6 | 0 | -1.731428 | 2.011682  | 0.164949  |
| 36 | 6 | 0 | -0.590948 | 1.916444  | 0.857174  |
| 37 | 6 | 0 | 0.713909  | 2.162857  | 0.271245  |
| 38 | 6 | 0 | 1.832164  | 1.604315  | 0.754058  |
| 39 | 1 | 0 | 5.867019  | -2.695767 | 0.914066  |
| 40 | 1 | 0 | 6.039455  | -1.636904 | -1.300713 |
| 41 | 1 | 0 | 4.476801  | -1.470607 | -2.091414 |
| 42 | 1 | 0 | 5.982283  | 1.810011  | 0.209049  |
| 43 | 1 | 0 | 6.446353  | 0.190154  | 0.711905  |
| 44 | 1 | 0 | 8.306803  | 1.319452  | -0.530325 |
| 45 | 1 | 0 | 7.757014  | -0.079974 | -1.447634 |
| 46 | 1 | 0 | 7.259780  | 1.542620  | -1.933413 |
| 47 | 1 | 0 | 1.809891  | -0.925415 | -1.286934 |
| 48 | 1 | 0 | 0.120031  | -1.163473 | 2.435606  |
| 49 | 1 | 0 | 0.105243  | -2.853197 | 1.961700  |
| 50 | 1 | 0 | 1.637134  | -2.056652 | 2.295638  |
| 51 | 1 | 0 | -0.417064 | -1.182822 | -1.412213 |
| 52 | 1 | 0 | -1.880688 | -1.496653 | 1.249989  |
| 53 | 1 | 0 | -5.685460 | 2.027609  | -0.586779 |
| 54 | 1 | 0 | -5.838444 | -0.251160 | -2.502154 |
| 55 | 1 | 0 | -4.950483 | -2.977106 | 1.032883  |
| 56 | 1 | 0 | -3.756786 | 3.392606  | 0.972809  |
| 57 | 1 | 0 | -2.543878 | 0.275788  | 2.289706  |

|    |   |   |           |          |           |
|----|---|---|-----------|----------|-----------|
| 58 | 1 | 0 | -2.849340 | 1.960721 | 2.708882  |
| 59 | 1 | 0 | -4.198370 | 0.886816 | 2.344959  |
| 60 | 1 | 0 | -1.702989 | 2.403025 | -0.849628 |
| 61 | 1 | 0 | -0.595721 | 1.497147 | 1.857963  |
| 62 | 1 | 0 | 0.751271  | 2.687916 | -0.679283 |
| 63 | 1 | 0 | 1.790252  | 1.023770 | 1.668598  |

-----

**Compound 4**

The number of imaginary frequencies: 0

Energy: E(RB3LYP) = -1402.79168094

Cartesian Coordinates:

-----

| Center<br>Number | Atomic<br>Number | Atomic<br>Type | Coordinates (Angstroms) |          |           |
|------------------|------------------|----------------|-------------------------|----------|-----------|
|                  |                  |                | X                       | Y        | Z         |
| 1                | 8                | 0              | 2.757187                | 2.370666 | 0.583223  |
| 2                | 6                | 0              | 2.313473                | 1.430899 | -0.079576 |
| 3                | 6                | 0              | 1.036092                | 1.555635 | -0.850509 |
| 4                | 6                | 0              | 0.044054                | 2.339534 | -0.413641 |
| 5                | 6                | 0              | -1.273727               | 2.564155 | -1.124288 |
| 6                | 1                | 0              | -1.118196               | 2.367388 | -2.197299 |
| 7                | 8                | 0              | -1.711559               | 3.918010 | -0.949130 |
| 8                | 6                | 0              | -2.372307               | 1.615708 | -0.666594 |
| 9                | 1                | 0              | -2.580059               | 0.830361 | -1.390570 |
| 10               | 6                | 0              | -3.063921               | 1.604779 | 0.484515  |

-----

|    |   |   |           |           |           |
|----|---|---|-----------|-----------|-----------|
| 11 | 6 | 0 | -2.853224 | 2.589719  | 1.609351  |
| 12 | 6 | 0 | -4.133087 | 0.550958  | 0.741019  |
| 13 | 1 | 0 | -4.704949 | 0.871417  | 1.620492  |
| 14 | 6 | 0 | -3.656400 | -0.924298 | 1.098360  |
| 15 | 6 | 0 | -4.986317 | -1.683532 | 0.936736  |
| 16 | 1 | 0 | -5.666032 | -1.382545 | 1.752563  |
| 17 | 8 | 0 | -4.804660 | -3.087096 | 0.935952  |
| 18 | 6 | 0 | -5.565699 | -1.139213 | -0.377945 |
| 19 | 1 | 0 | -5.028857 | -1.624124 | -1.203578 |
| 20 | 8 | 0 | -6.937476 | -1.423946 | -0.557669 |
| 21 | 6 | 0 | -5.223232 | 0.376136  | -0.361256 |
| 22 | 1 | 0 | -4.871756 | 0.712813  | -1.342182 |
| 23 | 8 | 0 | -6.428981 | 1.074558  | -0.022632 |
| 24 | 1 | 0 | -3.315068 | -0.940053 | 2.139214  |
| 25 | 6 | 0 | -2.553800 | -1.447130 | 0.224770  |
| 26 | 6 | 0 | -1.264593 | -1.455542 | 0.599779  |
| 27 | 6 | 0 | -0.111182 | -1.649780 | -0.281923 |
| 28 | 6 | 0 | -0.361648 | -2.086645 | -1.705581 |
| 29 | 6 | 0 | 1.101923  | -1.292862 | 0.191456  |
| 30 | 6 | 0 | 2.370355  | -1.053281 | -0.589059 |
| 31 | 1 | 0 | 2.178789  | -1.047256 | -1.666030 |
| 32 | 7 | 0 | 2.982256  | 0.232813  | -0.165847 |
| 33 | 6 | 0 | 4.245487  | 0.057620  | 0.580285  |
| 34 | 1 | 0 | 4.168420  | 0.616737  | 1.518040  |
| 35 | 6 | 0 | 5.445564  | 0.618986  | -0.219455 |
| 36 | 6 | 0 | 6.738635  | 0.553641  | 0.544537  |

|    |   |   |           |           |           |
|----|---|---|-----------|-----------|-----------|
| 37 | 6 | 0 | 7.833848  | -0.106658 | 0.154740  |
| 38 | 6 | 0 | 9.132769  | -0.158248 | 0.908088  |
| 39 | 6 | 0 | 4.294617  | -1.460135 | 0.829881  |
| 40 | 6 | 0 | 3.495560  | -2.078067 | -0.325283 |
| 41 | 1 | 0 | 3.071834  | -3.057727 | -0.065843 |
| 42 | 8 | 0 | 4.252416  | -2.171906 | -1.534280 |
| 43 | 1 | 0 | 0.935389  | 0.995136  | -1.778618 |
| 44 | 1 | 0 | 0.169502  | 2.860226  | 0.534778  |
| 45 | 1 | 0 | -0.962087 | 4.489944  | -1.184070 |
| 46 | 1 | 0 | -2.145361 | 3.375622  | 1.346835  |
| 47 | 1 | 0 | -3.802295 | 3.069065  | 1.885593  |
| 48 | 1 | 0 | -2.495330 | 2.070755  | 2.510164  |
| 49 | 1 | 0 | -5.668802 | -3.470219 | 0.710267  |
| 50 | 1 | 0 | -7.406129 | -0.606929 | -0.304868 |
| 51 | 1 | 0 | -6.362010 | 1.984413  | -0.346505 |
| 52 | 1 | 0 | -2.816406 | -1.739631 | -0.789383 |
| 53 | 1 | 0 | -1.024300 | -1.154929 | 1.620365  |
| 54 | 1 | 0 | -0.930153 | -3.024167 | -1.722432 |
| 55 | 1 | 0 | -0.959031 | -1.343541 | -2.250642 |
| 56 | 1 | 0 | 0.562529  | -2.253906 | -2.262825 |
| 57 | 1 | 0 | 1.168403  | -1.002325 | 1.239917  |
| 58 | 1 | 0 | 5.527045  | 0.075861  | -1.166930 |
| 59 | 1 | 0 | 5.206277  | 1.665177  | -0.450630 |
| 60 | 1 | 0 | 6.765360  | 1.099895  | 1.490705  |
| 61 | 1 | 0 | 7.809003  | -0.644770 | -0.795589 |
| 62 | 1 | 0 | 9.074525  | 0.400083  | 1.848685  |

|    |   |   |          |           |           |
|----|---|---|----------|-----------|-----------|
| 63 | 1 | 0 | 9.419091 | -1.192320 | 1.144599  |
| 64 | 1 | 0 | 9.954670 | 0.264761  | 0.314344  |
| 65 | 1 | 0 | 5.320798 | -1.839463 | 0.880653  |
| 66 | 1 | 0 | 3.805624 | -1.707726 | 1.779909  |
| 67 | 1 | 0 | 5.028909 | -2.724300 | -1.352346 |

-----

**Compound 5**

The number of imaginary frequencies: 0

Energy: E(RB3LYP) = -1327.56401830

Cartesian Coordinates:

-----

| Center<br>Number | Atomic<br>Number | Atomic<br>Type | Coordinates (Angstroms) |           |           |
|------------------|------------------|----------------|-------------------------|-----------|-----------|
|                  |                  |                | X                       | Y         | Z         |
| 1                | 8                | 0              | 3.262301                | -2.736857 | -1.120339 |
| 2                | 6                | 0              | 3.636616                | -1.612343 | -0.771582 |
| 3                | 6                | 0              | 2.670889                | -0.427633 | -0.802734 |
| 4                | 1                | 0              | 2.666380                | -0.096625 | -1.848279 |
| 5                | 6                | 0              | 1.275316                | -0.828596 | -0.413353 |
| 6                | 6                | 0              | 0.185276                | -0.277557 | -0.948309 |
| 7                | 6                | 0              | -1.189632               | -0.332445 | -0.362594 |
| 8                | 1                | 0              | -1.217515               | -1.137745 | 0.378032  |
| 9                | 6                | 0              | -1.624923               | 0.968955  | 0.431000  |
| 10               | 6                | 0              | -3.157665               | 0.787381  | 0.566834  |
| 11               | 6                | 0              | -3.669174               | 0.238758  | 1.924772  |

-----



|    |   |   |           |           |           |
|----|---|---|-----------|-----------|-----------|
| 12 | 1 | 0 | -4.017525 | 1.043764  | 2.577191  |
| 13 | 8 | 0 | -2.636488 | -0.506927 | 2.580111  |
| 14 | 6 | 0 | -4.823045 | -0.692129 | 1.541018  |
| 15 | 1 | 0 | -5.047952 | -1.414117 | 2.333754  |
| 16 | 8 | 0 | -5.974577 | 0.104677  | 1.264454  |
| 17 | 6 | 0 | -4.306380 | -1.374554 | 0.271304  |
| 18 | 1 | 0 | -3.590775 | -2.144490 | 0.572408  |
| 19 | 8 | 0 | -5.420358 | -1.981514 | -0.388176 |
| 20 | 1 | 0 | -3.659434 | 1.739736  | 0.402963  |
| 21 | 6 | 0 | -3.612776 | -0.244451 | -0.516475 |
| 22 | 1 | 0 | -4.351870 | 0.190127  | -1.190761 |
| 23 | 6 | 0 | -2.358414 | -0.599187 | -1.343564 |
| 24 | 6 | 0 | -2.333642 | -2.002249 | -1.944941 |
| 25 | 8 | 0 | -2.355862 | 0.369061  | -2.418877 |
| 26 | 1 | 0 | -1.160767 | 0.894192  | 1.414795  |
| 27 | 6 | 0 | -1.260547 | 2.313160  | -0.166829 |
| 28 | 6 | 0 | -0.042835 | 2.887088  | -0.181970 |
| 29 | 6 | 0 | 0.194171  | 4.219228  | -0.846059 |
| 30 | 6 | 0 | 1.105447  | 2.134897  | 0.339653  |
| 31 | 6 | 0 | 2.298448  | 1.985817  | -0.246685 |
| 32 | 6 | 0 | 3.172470  | 0.804721  | 0.058835  |
| 33 | 1 | 0 | 3.048253  | 0.535349  | 1.111627  |
| 34 | 6 | 0 | 4.653758  | 1.042004  | -0.241205 |
| 35 | 6 | 0 | 5.526756  | -0.160974 | 0.117955  |
| 36 | 1 | 0 | 6.487823  | -0.051437 | -0.394659 |
| 37 | 6 | 0 | 5.817276  | -0.266178 | 1.625627  |

|    |   |   |           |           |           |
|----|---|---|-----------|-----------|-----------|
| 38 | 6 | 0 | 6.756369  | -1.412674 | 2.003760  |
| 39 | 7 | 0 | 4.916692  | -1.391386 | -0.405970 |
| 40 | 1 | 0 | 1.181438  | -1.460527 | 0.467058  |
| 41 | 1 | 0 | 0.317615  | 0.380440  | -1.803827 |
| 42 | 1 | 0 | -2.956128 | -0.762980 | 3.453641  |
| 43 | 1 | 0 | -6.519539 | -0.393014 | 0.638584  |
| 44 | 1 | 0 | -5.130661 | -2.379137 | -1.216997 |
| 45 | 1 | 0 | -2.354164 | -2.778342 | -1.177716 |
| 46 | 1 | 0 | -3.179340 | -2.146637 | -2.621492 |
| 47 | 1 | 0 | -1.418802 | -2.146683 | -2.525675 |
| 48 | 1 | 0 | -1.582120 | 0.210626  | -2.973870 |
| 49 | 1 | 0 | -2.070665 | 2.856140  | -0.645622 |
| 50 | 1 | 0 | 0.636523  | 4.933822  | -0.145513 |
| 51 | 1 | 0 | 0.891022  | 4.128928  | -1.685091 |
| 52 | 1 | 0 | -0.736949 | 4.640783  | -1.227303 |
| 53 | 1 | 0 | 0.889611  | 1.483733  | 1.181615  |
| 54 | 1 | 0 | 2.552245  | 2.560715  | -1.135058 |
| 55 | 1 | 0 | 4.768335  | 1.268308  | -1.306187 |
| 56 | 1 | 0 | 5.015196  | 1.912867  | 0.309323  |
| 57 | 1 | 0 | 6.265402  | 0.682691  | 1.935793  |
| 58 | 1 | 0 | 4.875210  | -0.365415 | 2.172761  |
| 59 | 1 | 0 | 6.979905  | -1.389857 | 3.072244  |
| 60 | 1 | 0 | 6.316977  | -2.389072 | 1.786235  |
| 61 | 1 | 0 | 7.705099  | -1.341377 | 1.464052  |
| 62 | 1 | 0 | 5.497646  | -2.218795 | -0.436366 |

## User Spectra

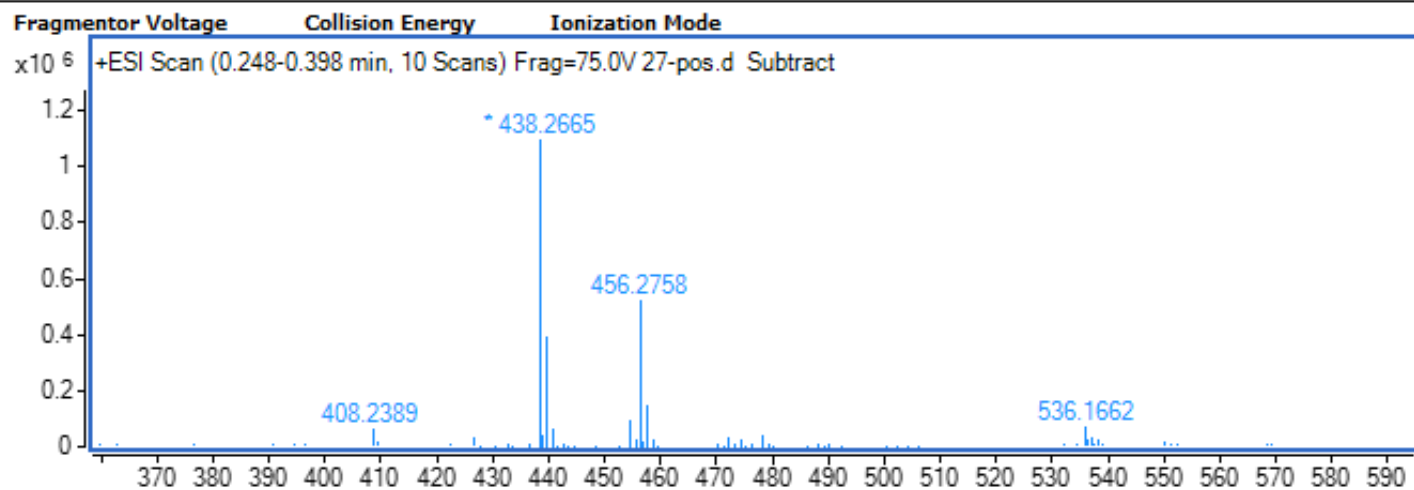

Figure S1. HRESIMS spectrum of compound **1**

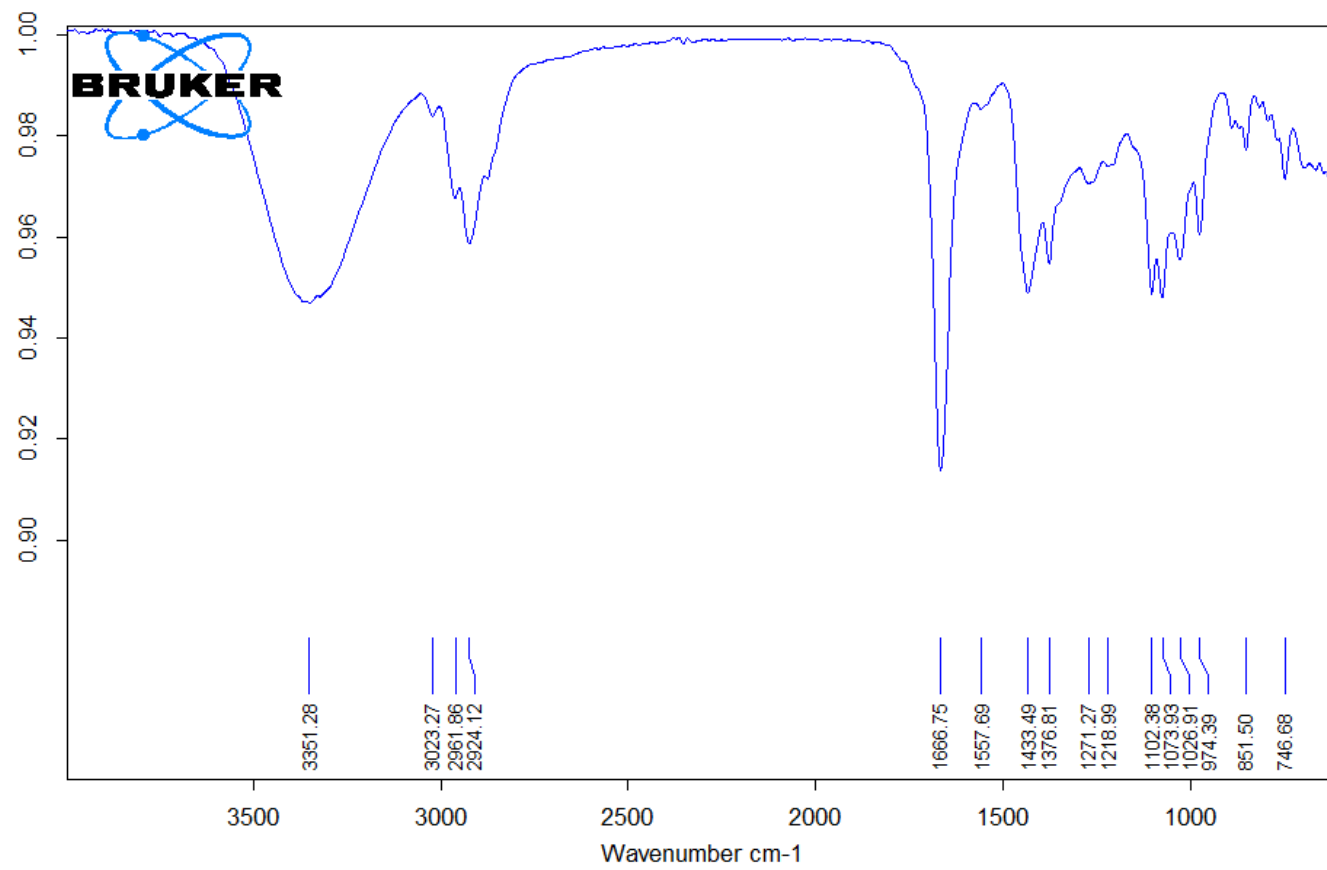

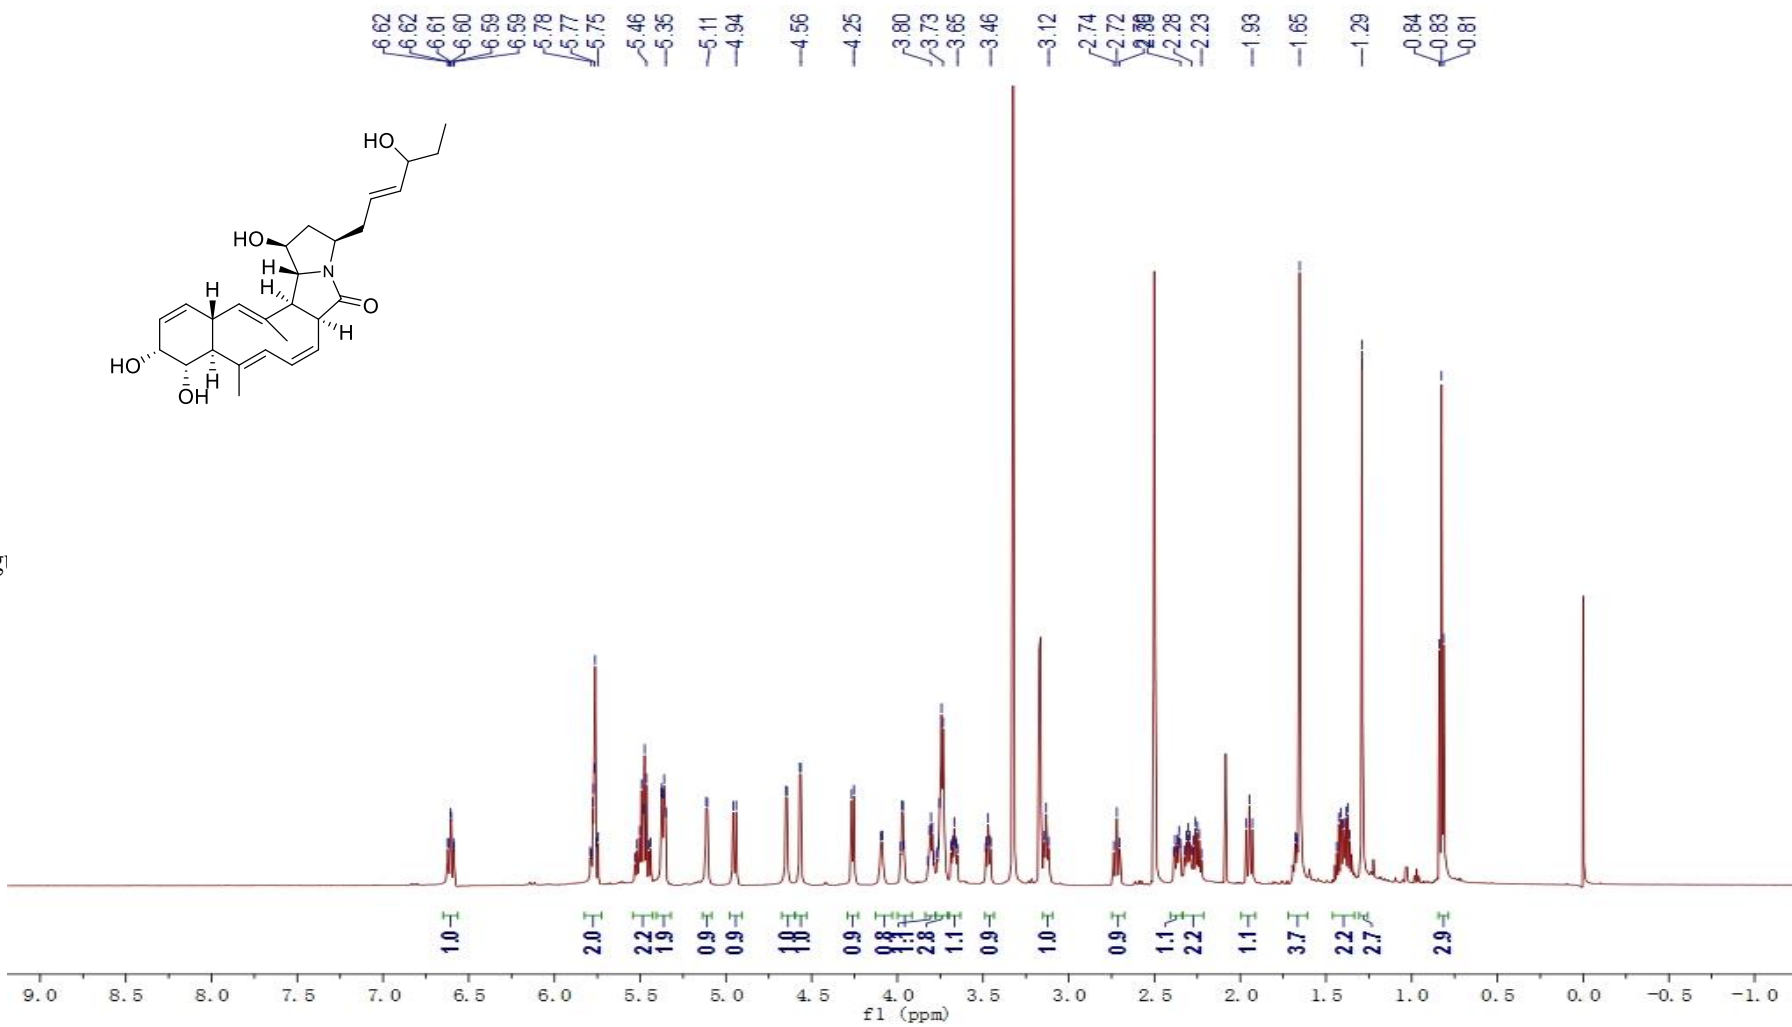

Fig

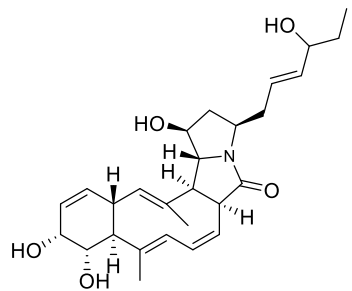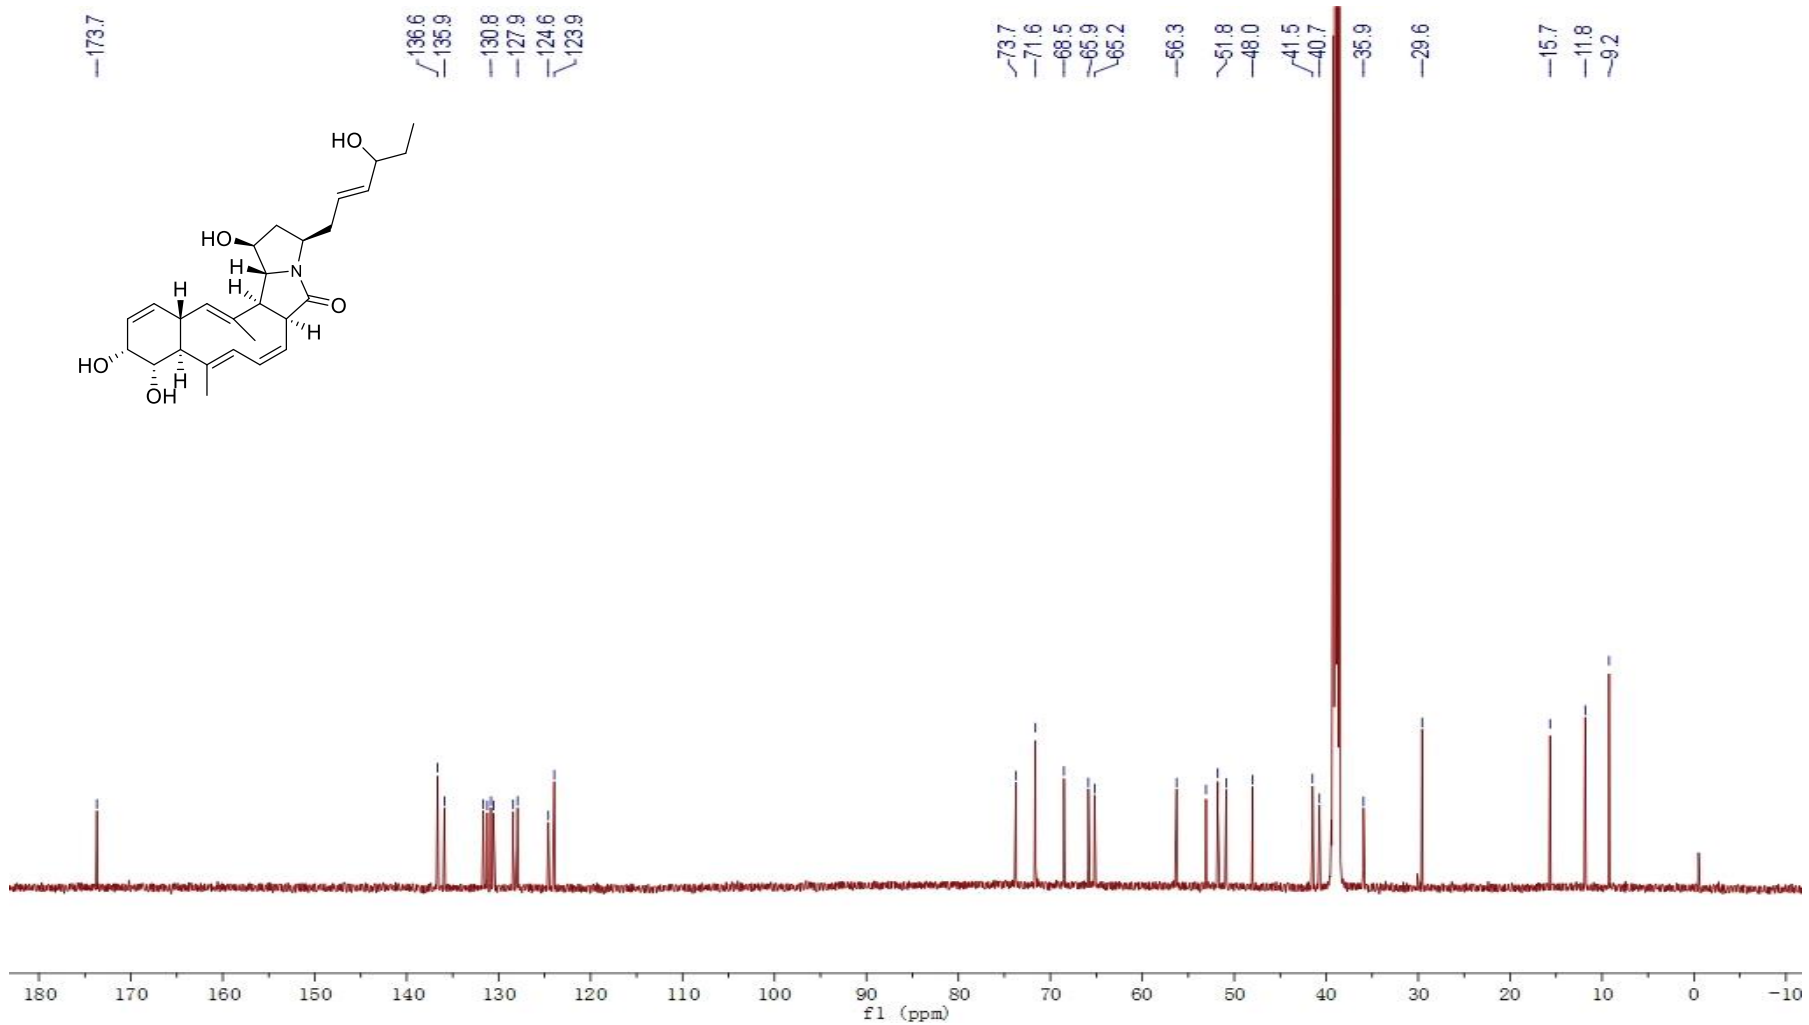

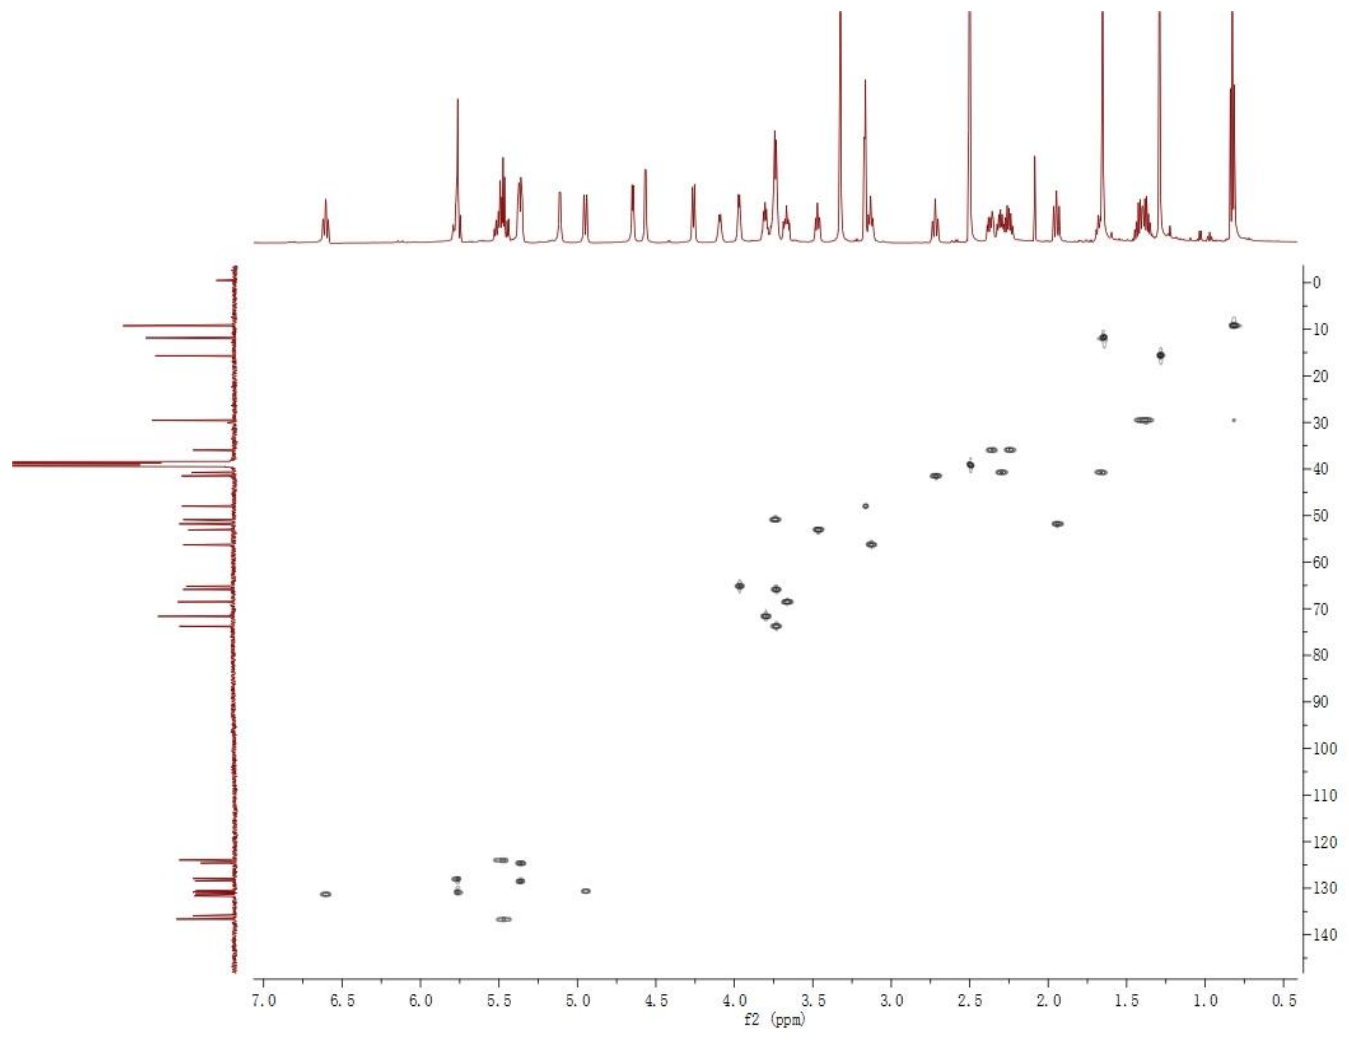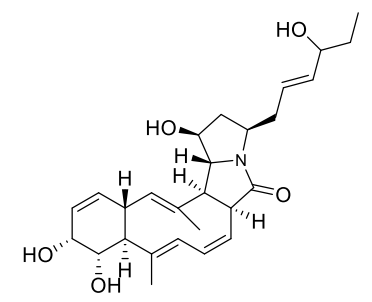

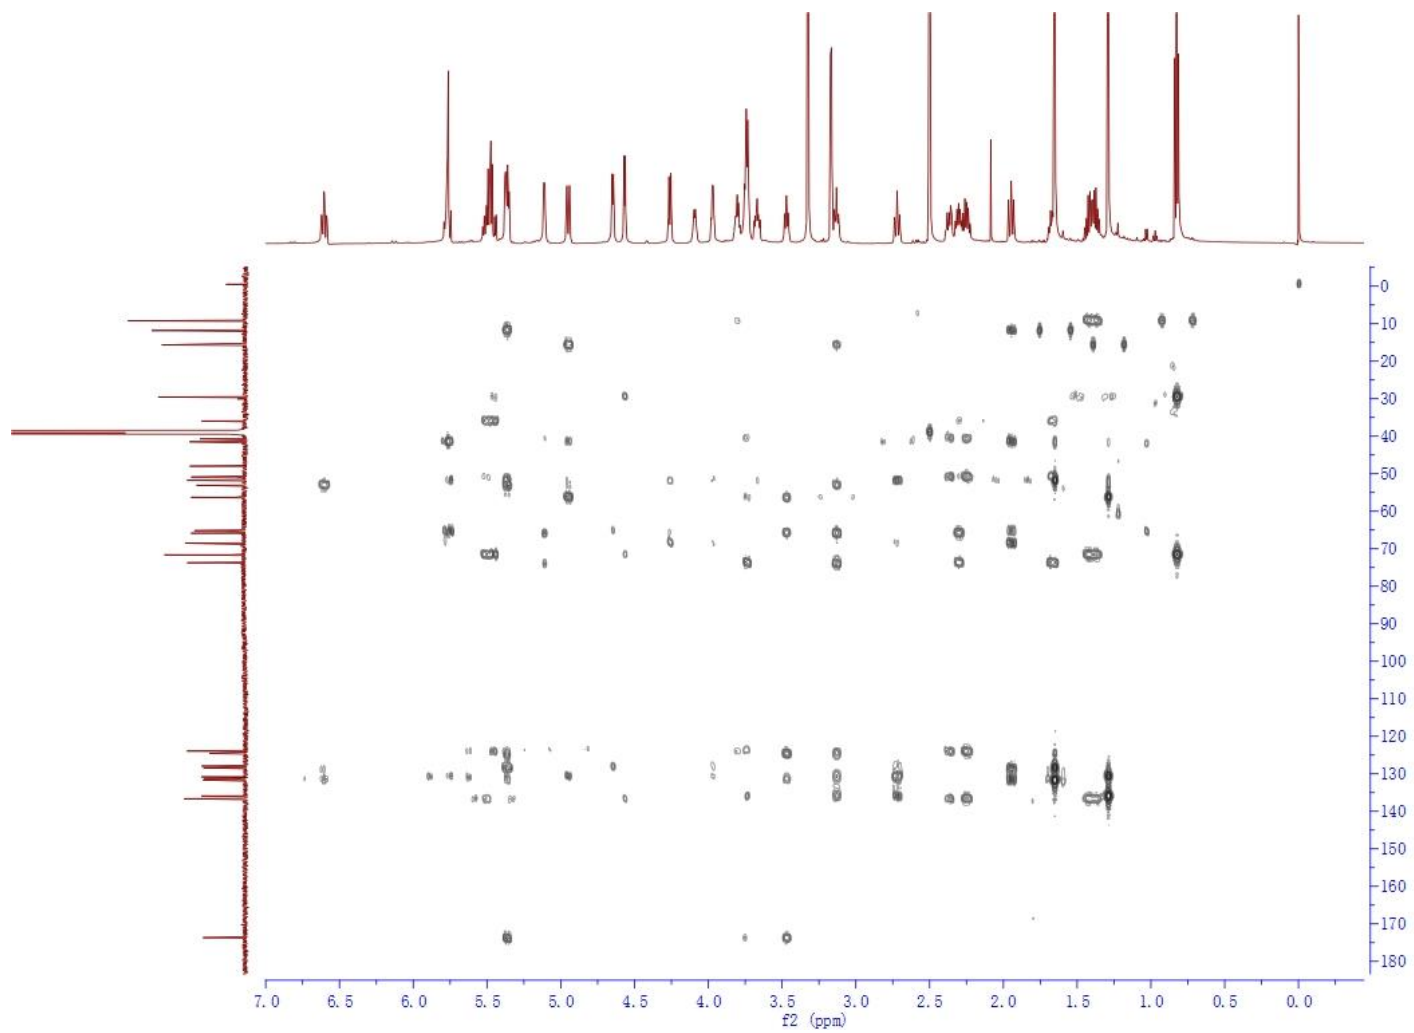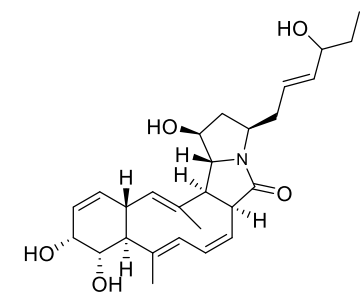



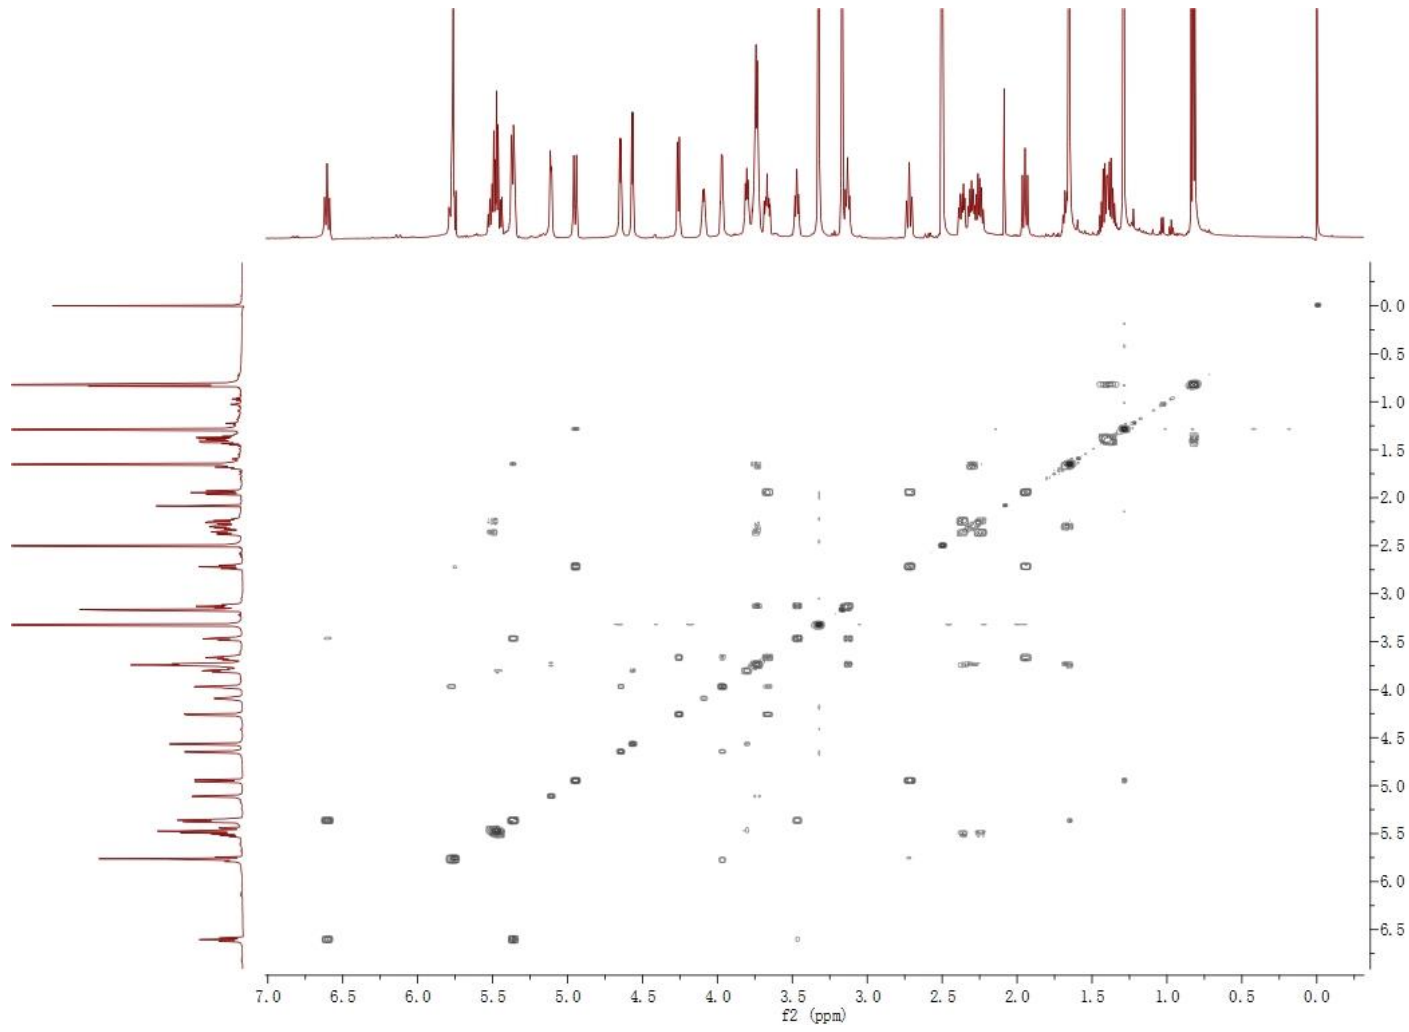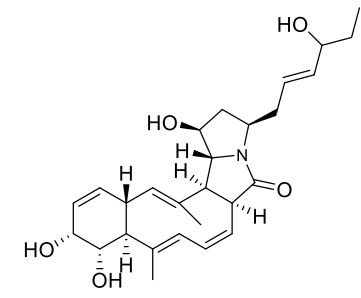

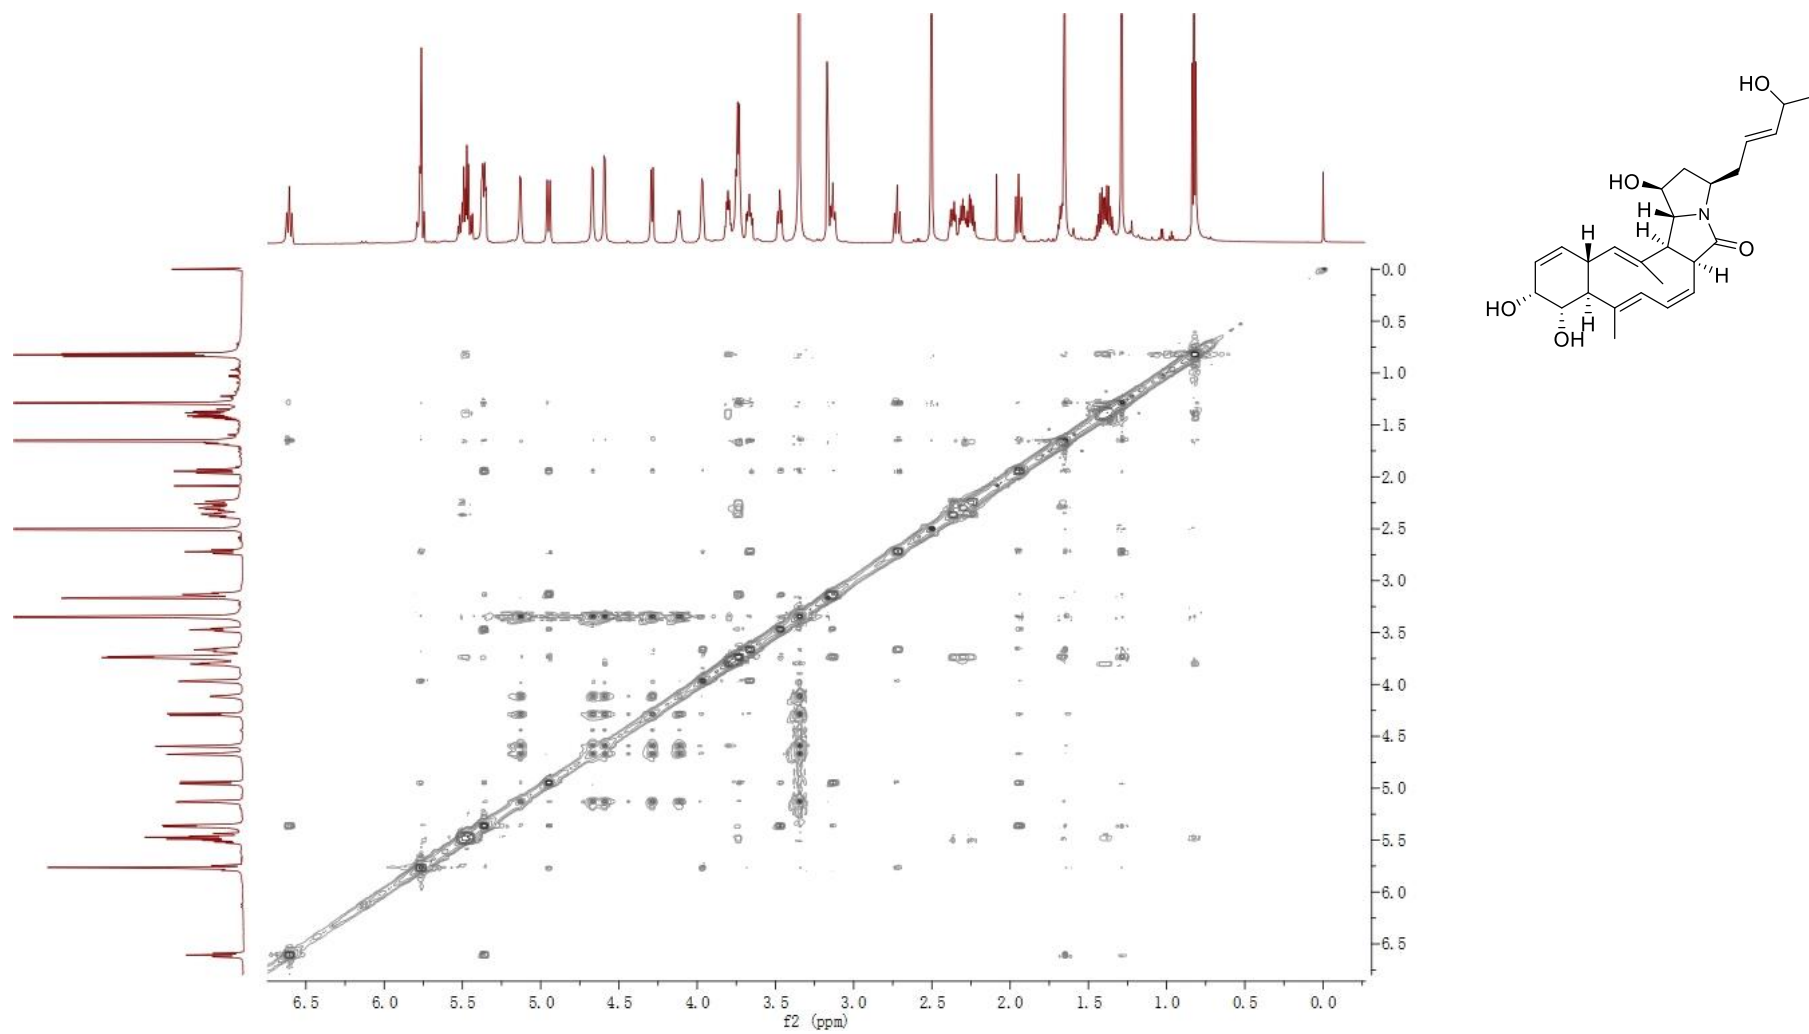

Figure S8. NOESY spectrum of compound **1**

## User Spectra

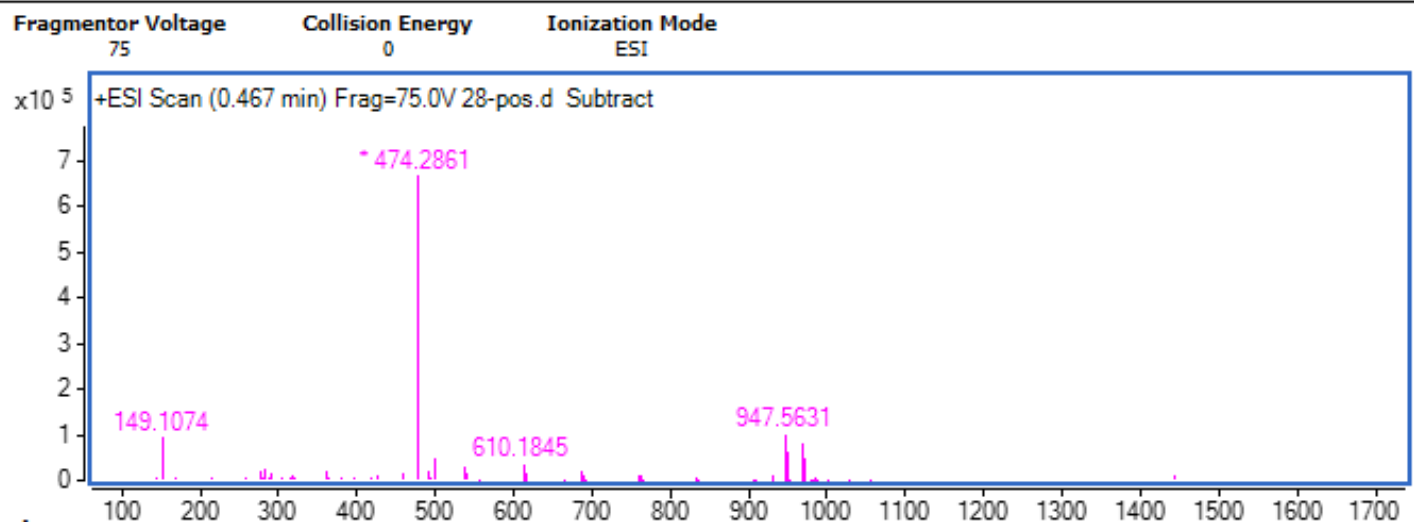

Figure S9. HRESIMS spectrum of compound **2**

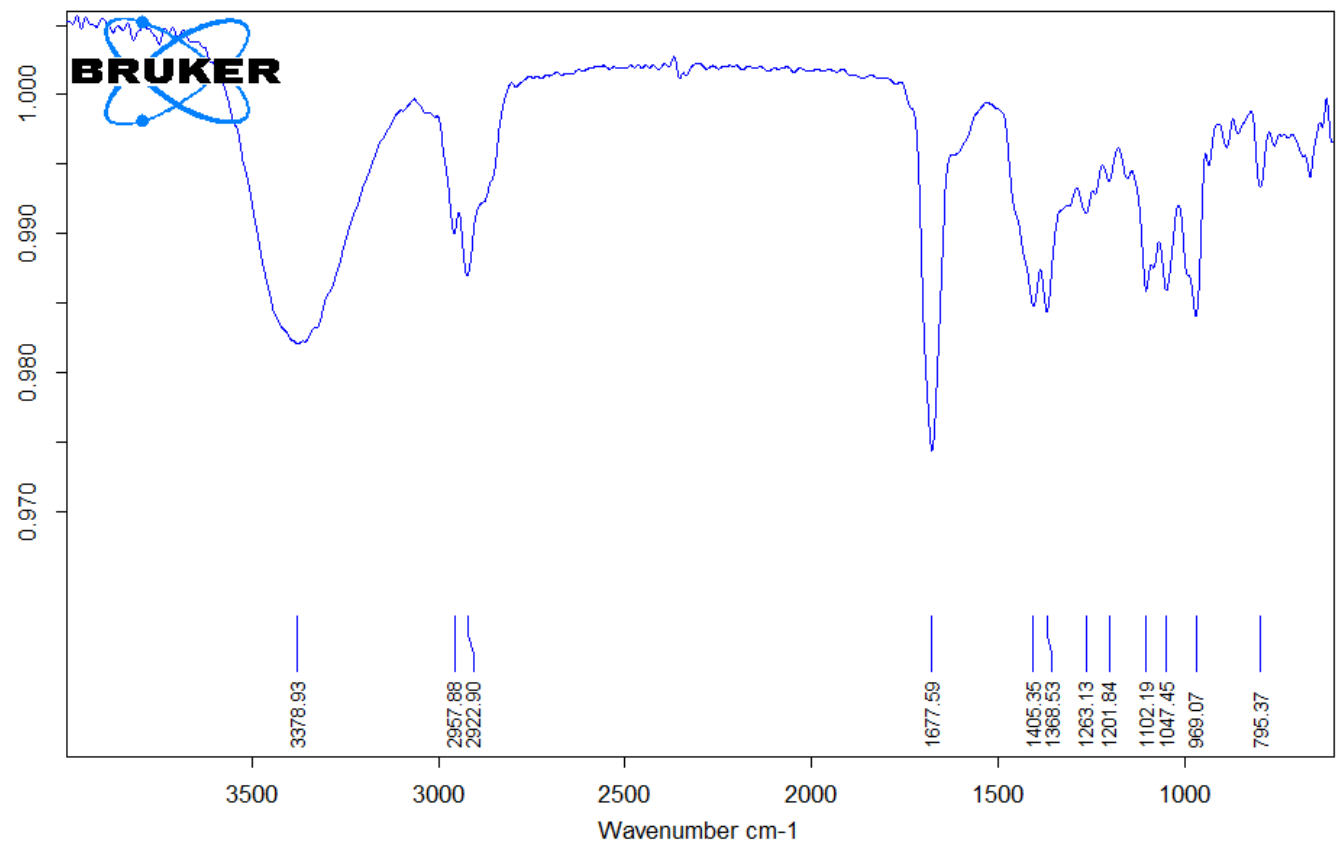

Figure S10. IR spectrum of compound **2**

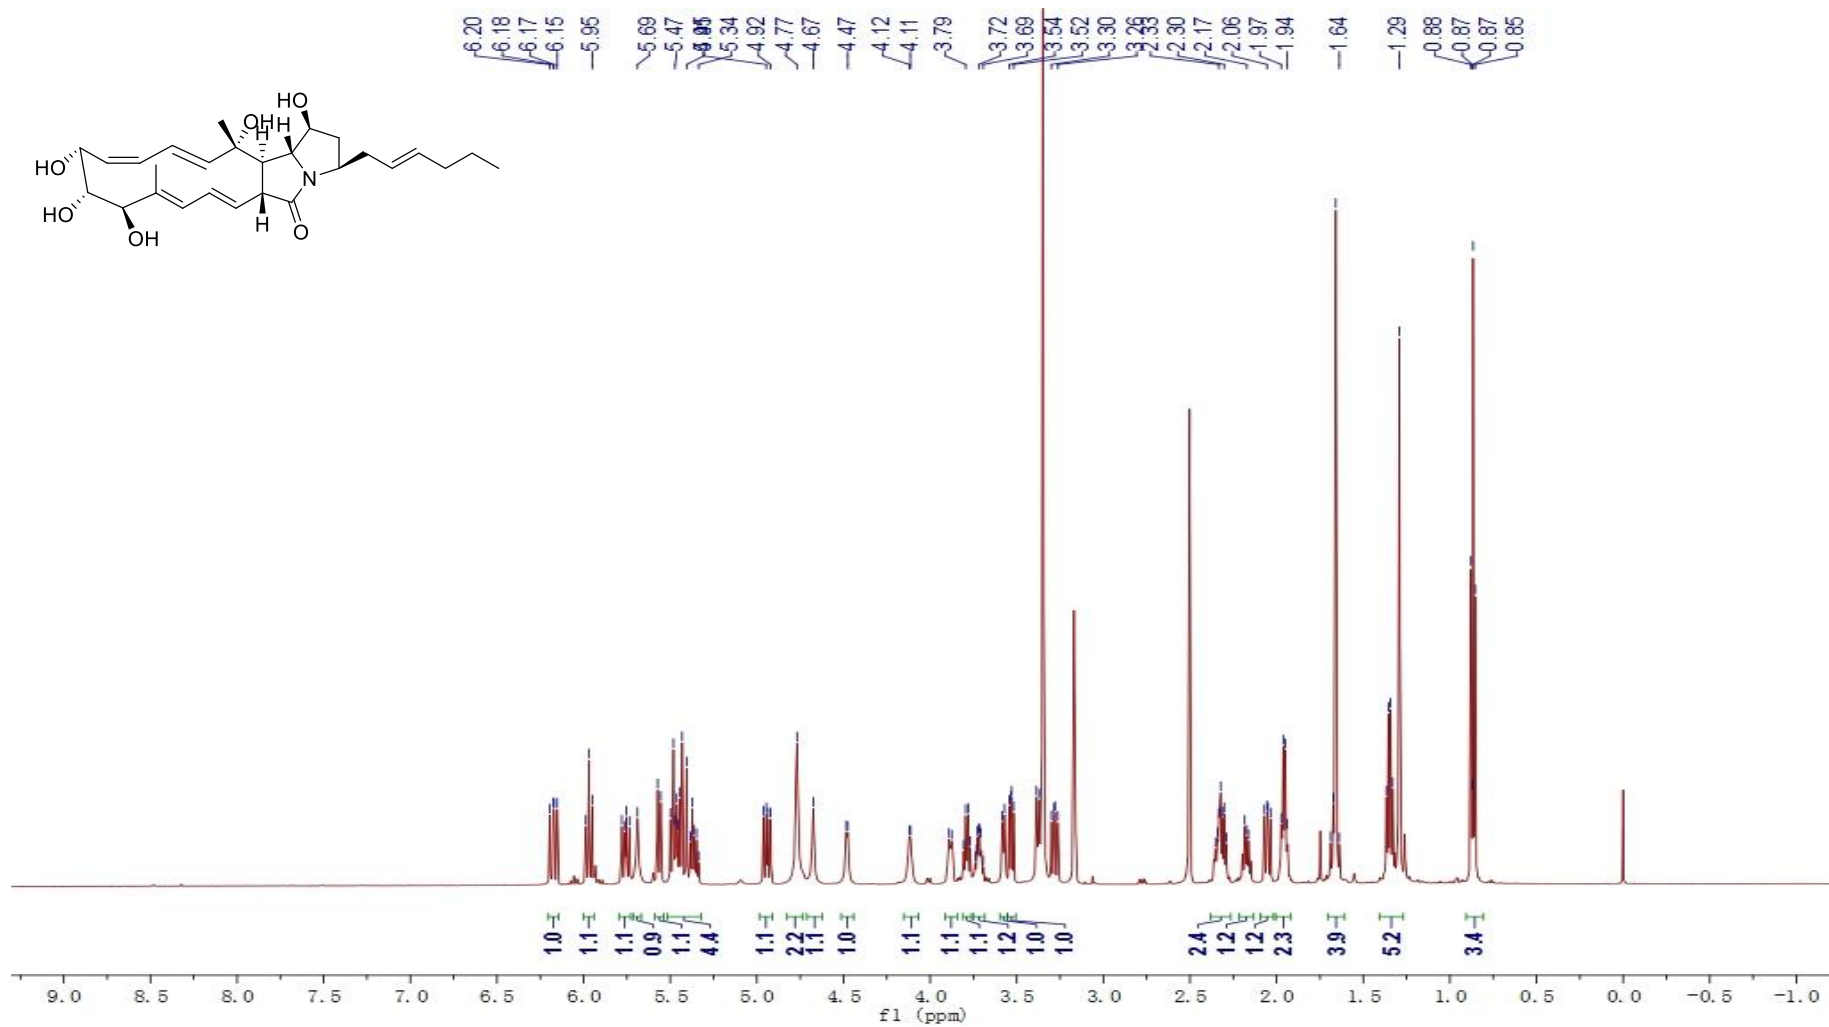

Figure S11.  $^1\text{H}$  NMR (600 MHz,  $\text{DMSO-}d_6$ ) spectrum of compound **2**



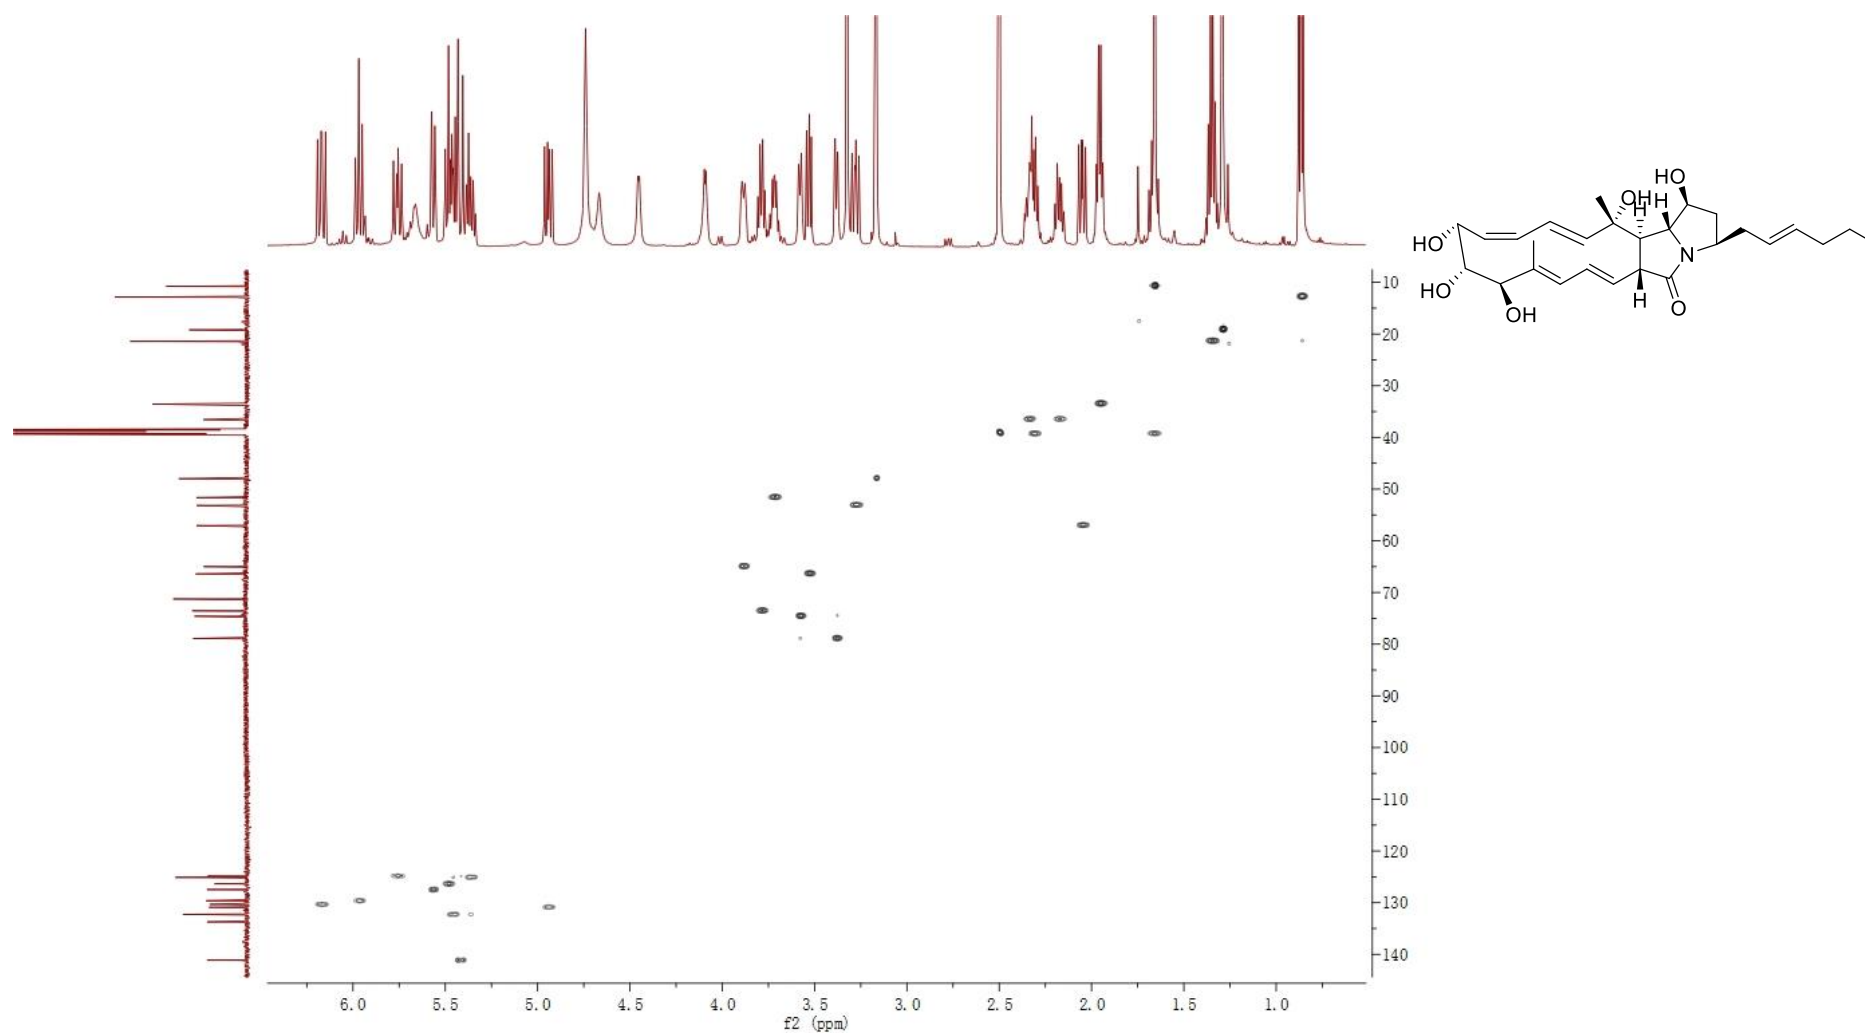

Figure S13. HSQC spectrum of compound 2

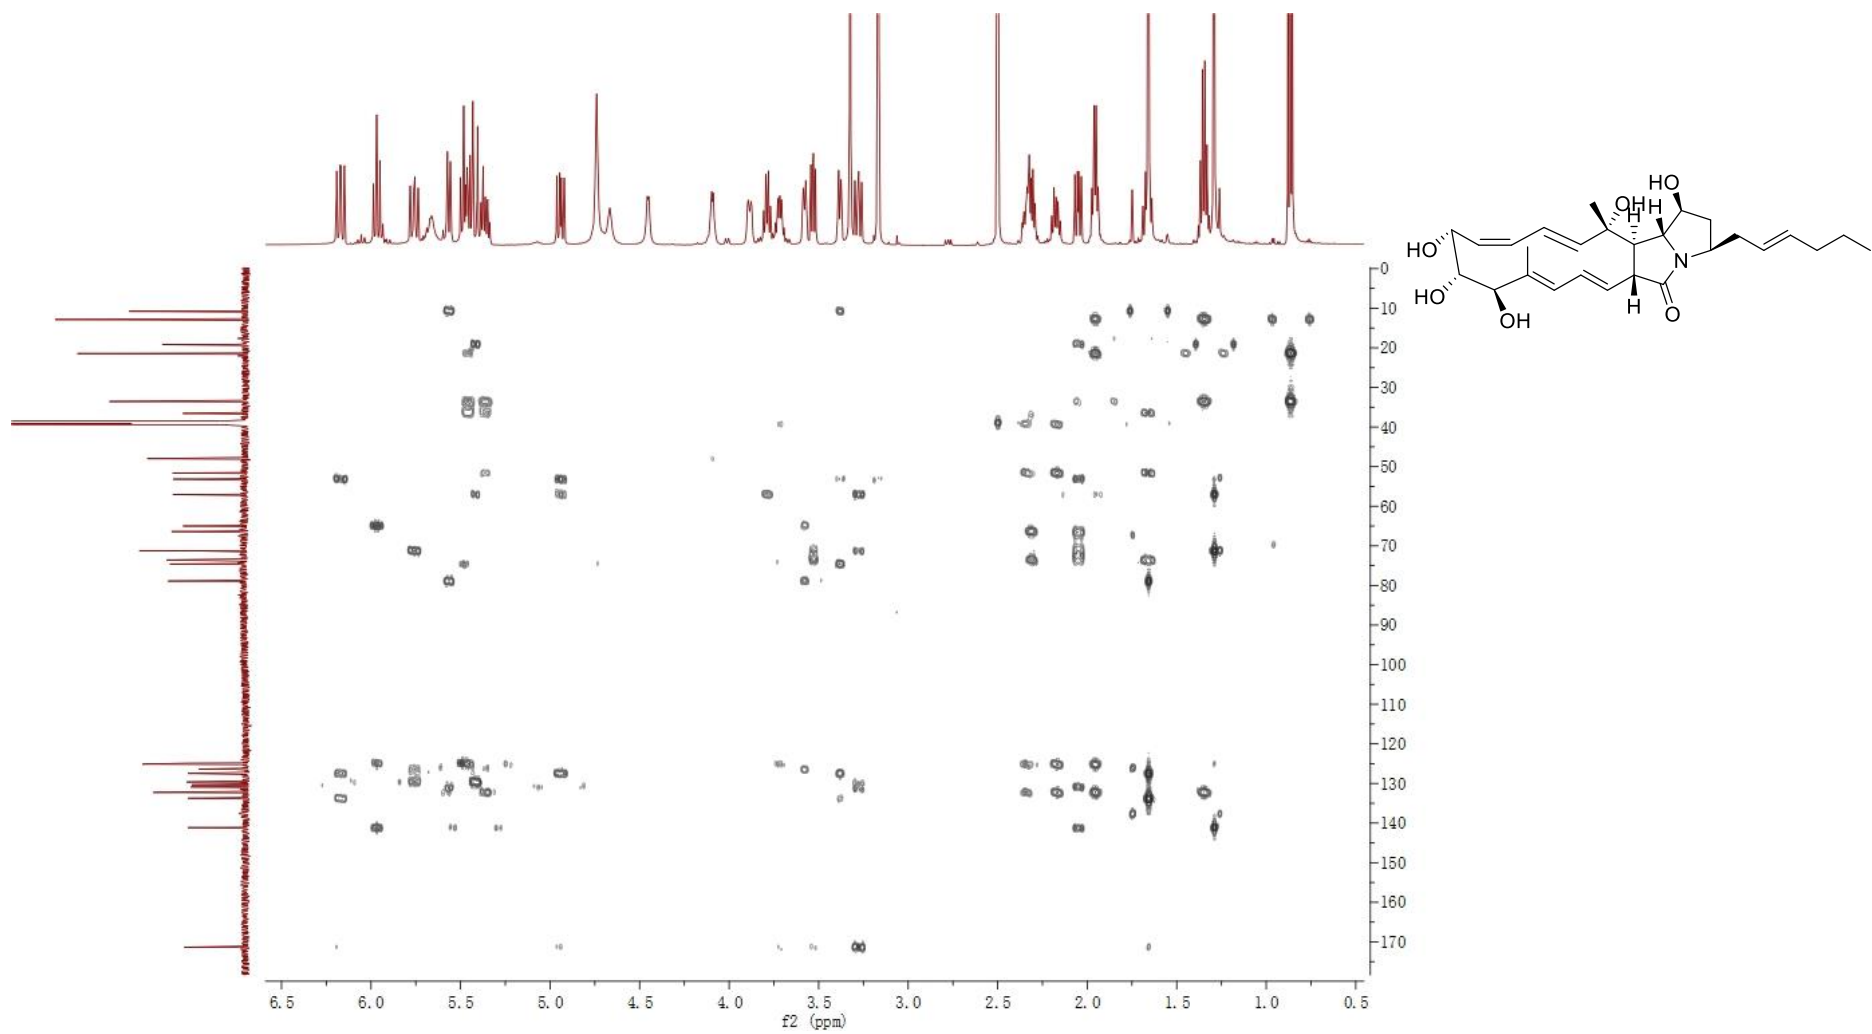

Figure S14. HMBC spectrum of compound 2



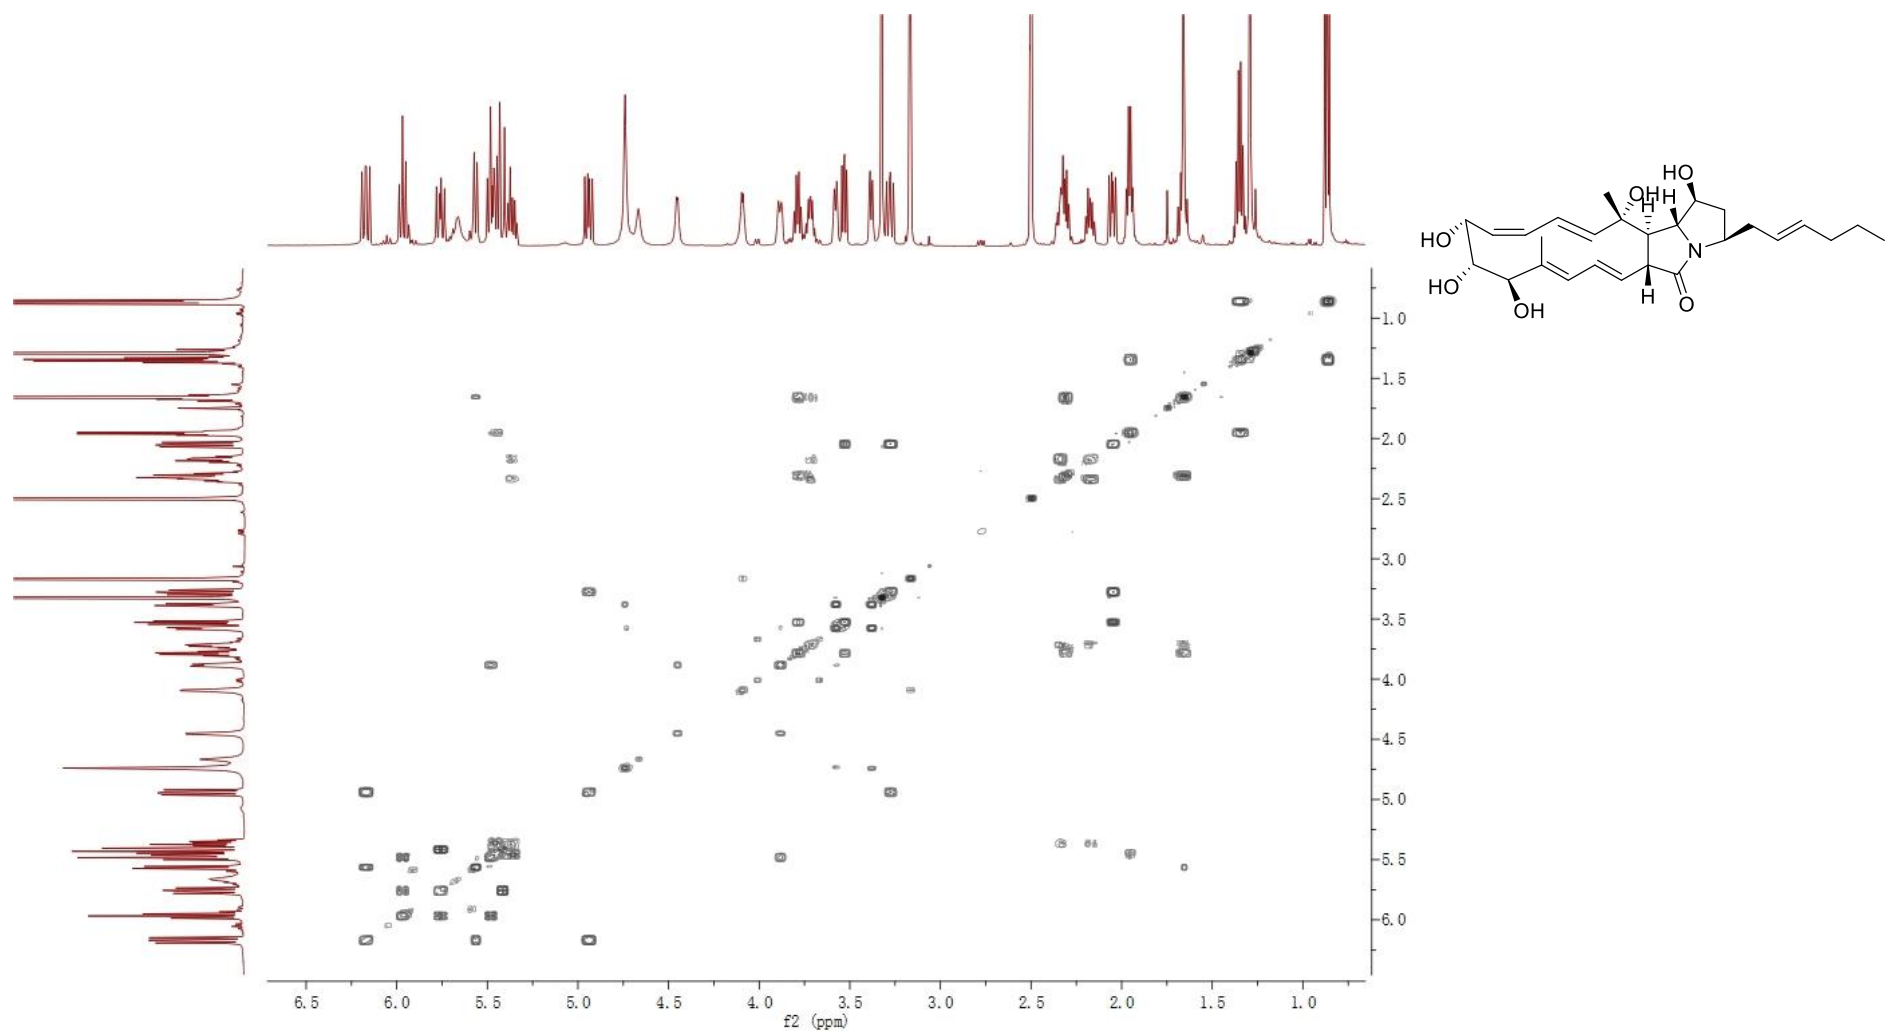

Figure S15. COSY spectrum of compound 2

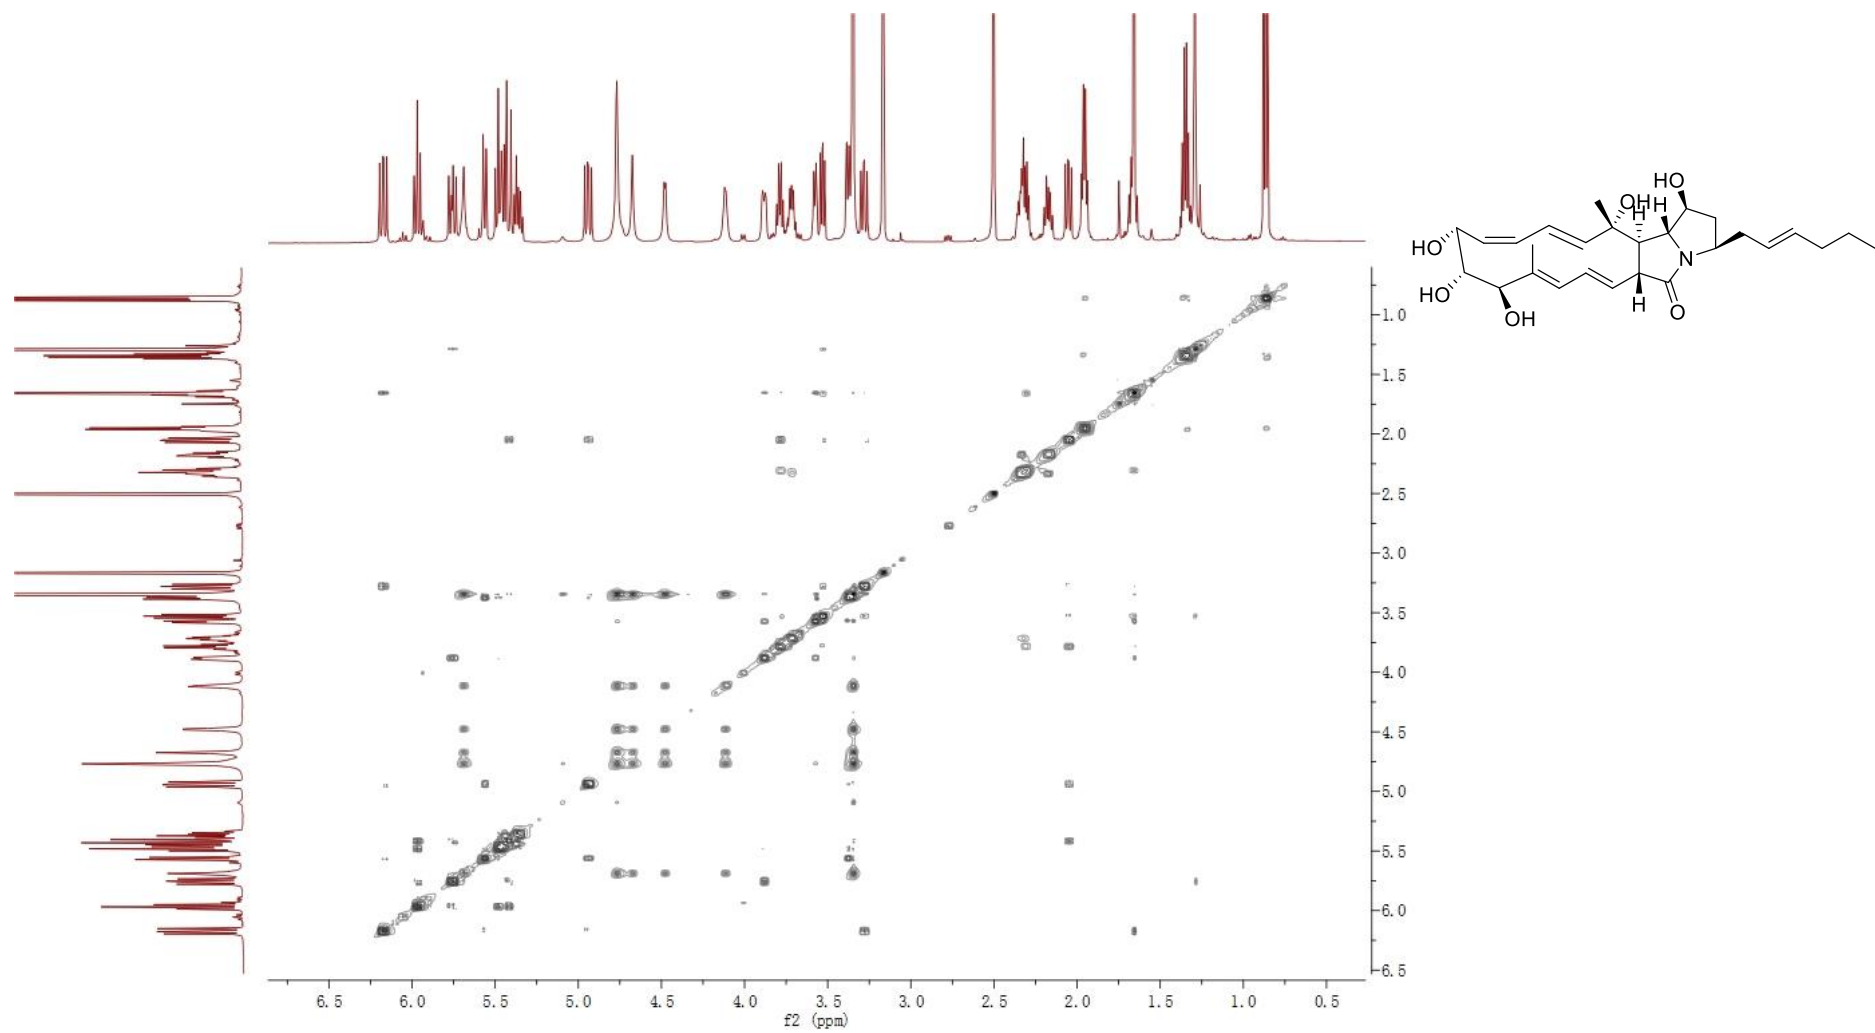

Figure S16. NOESY spectrum of compound 2

## User Spectra

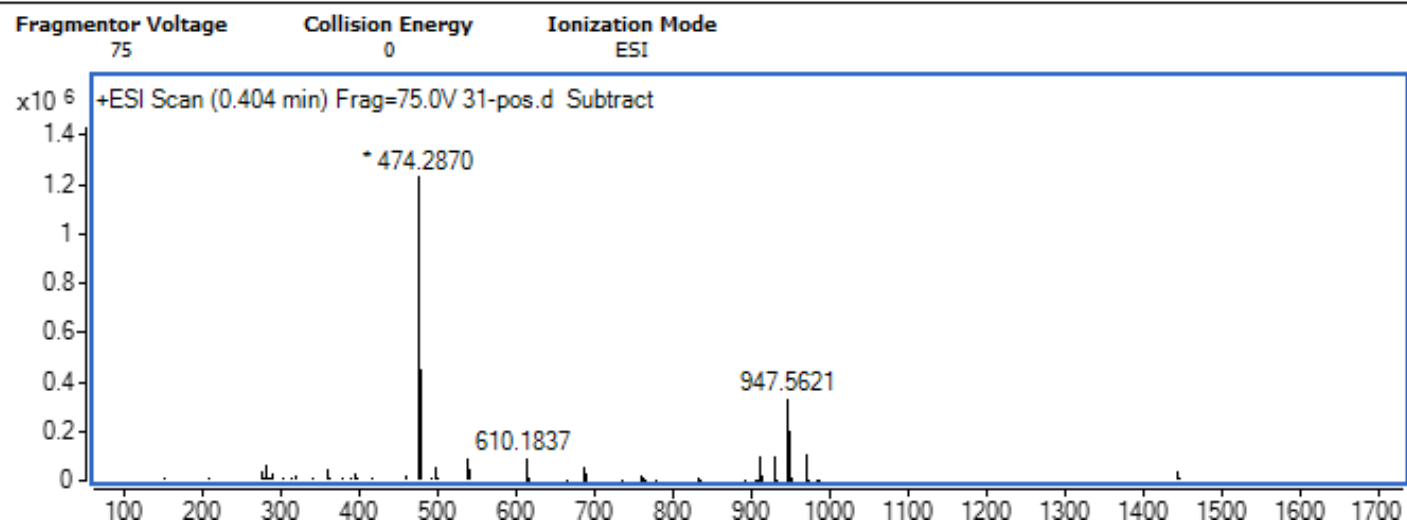

Figure S17. HRESIMS spectrum of compound **3**

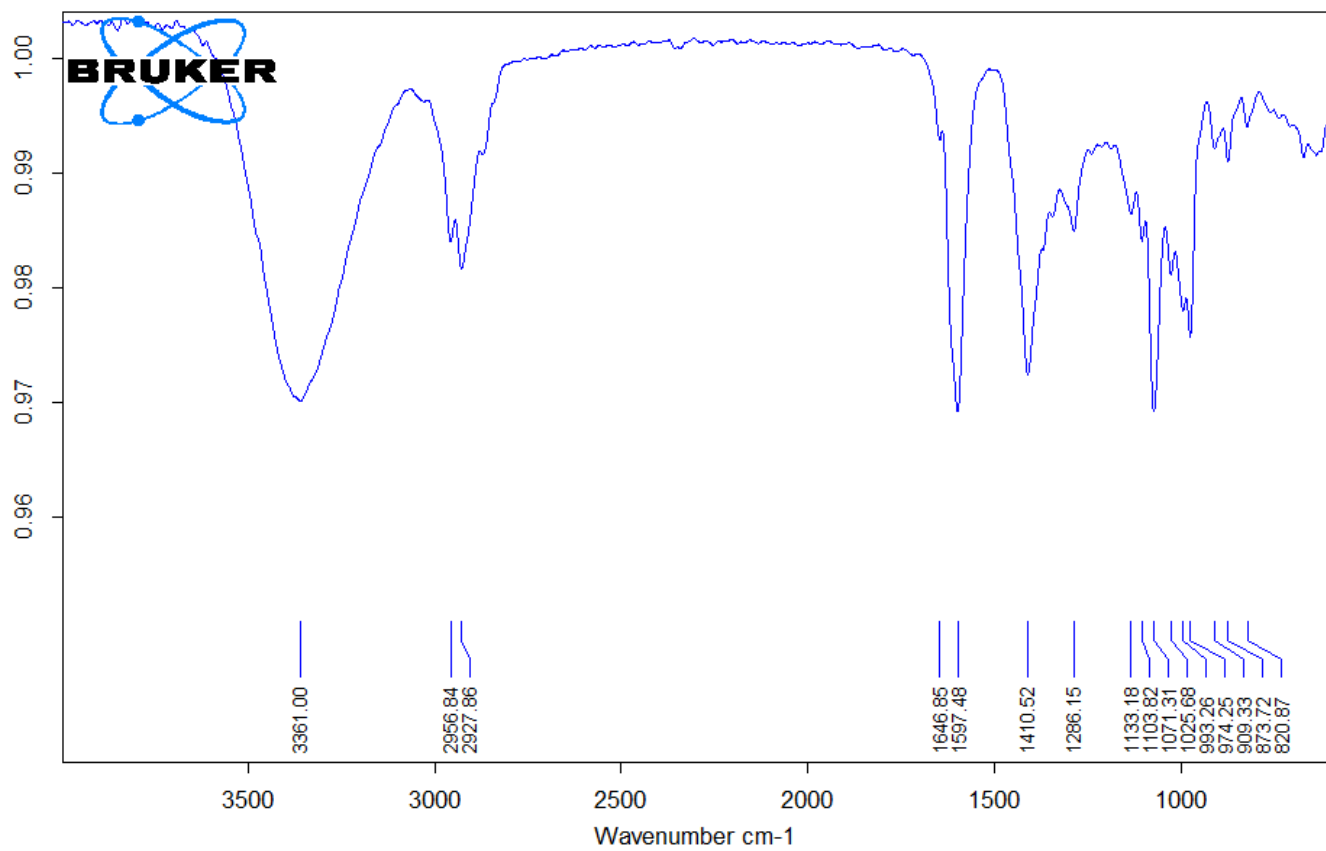

Figure S18. IR spectrum of compound 3

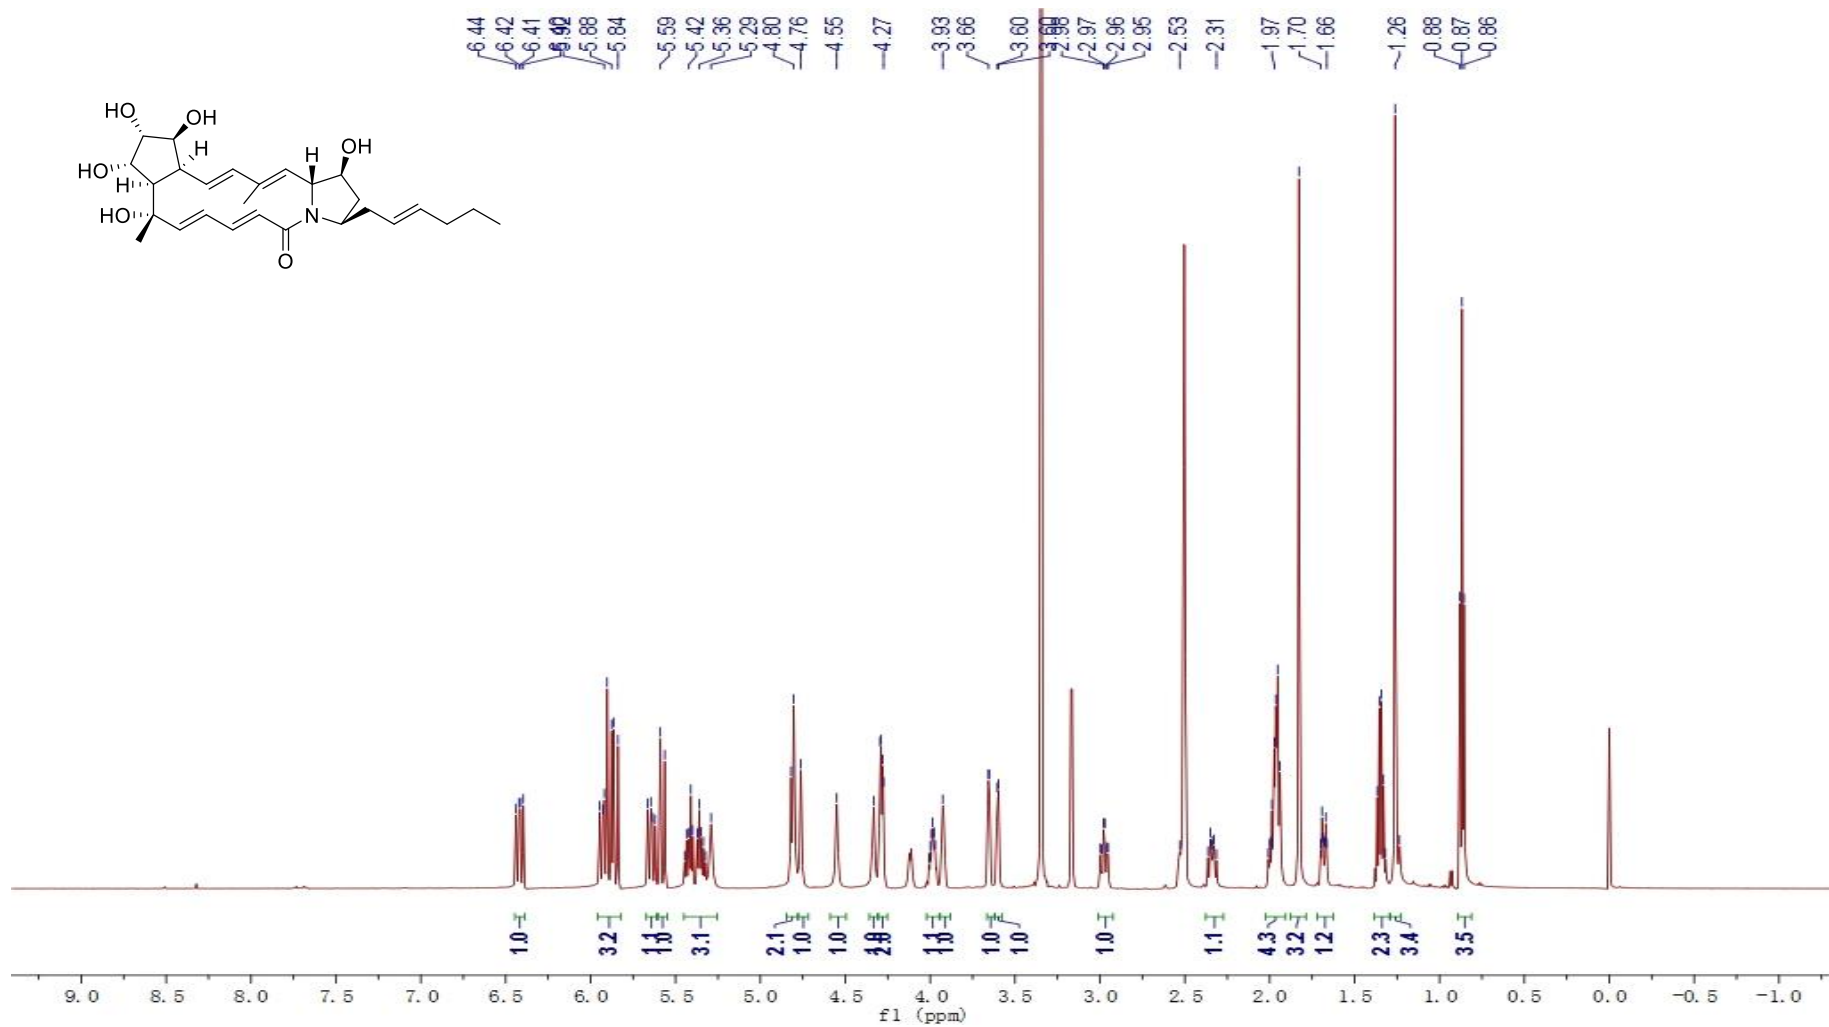

Figure S19.  $^1\text{H}$  NMR (600 MHz,  $\text{DMSO-}d_6$ ) spectrum of compound **3**

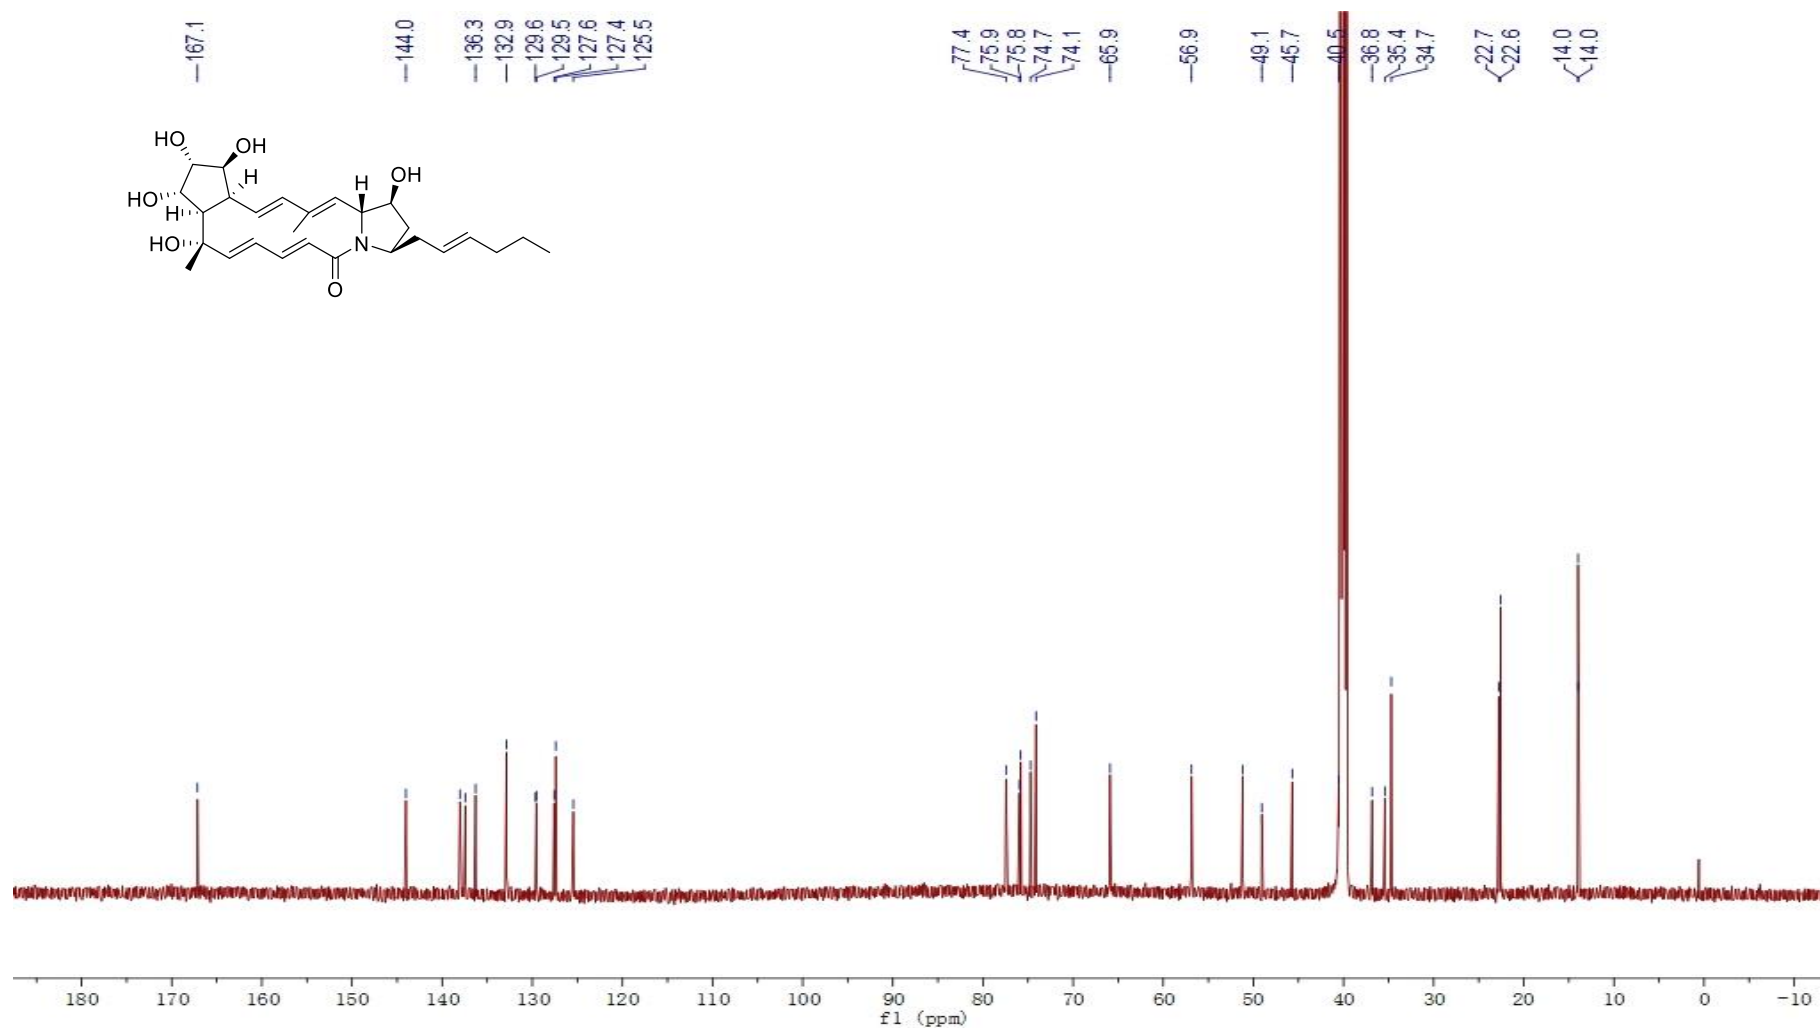

Figure S20. <sup>13</sup>C NMR (150 MHz, DMSO-*d*<sub>6</sub>) spectrum of compound **3**

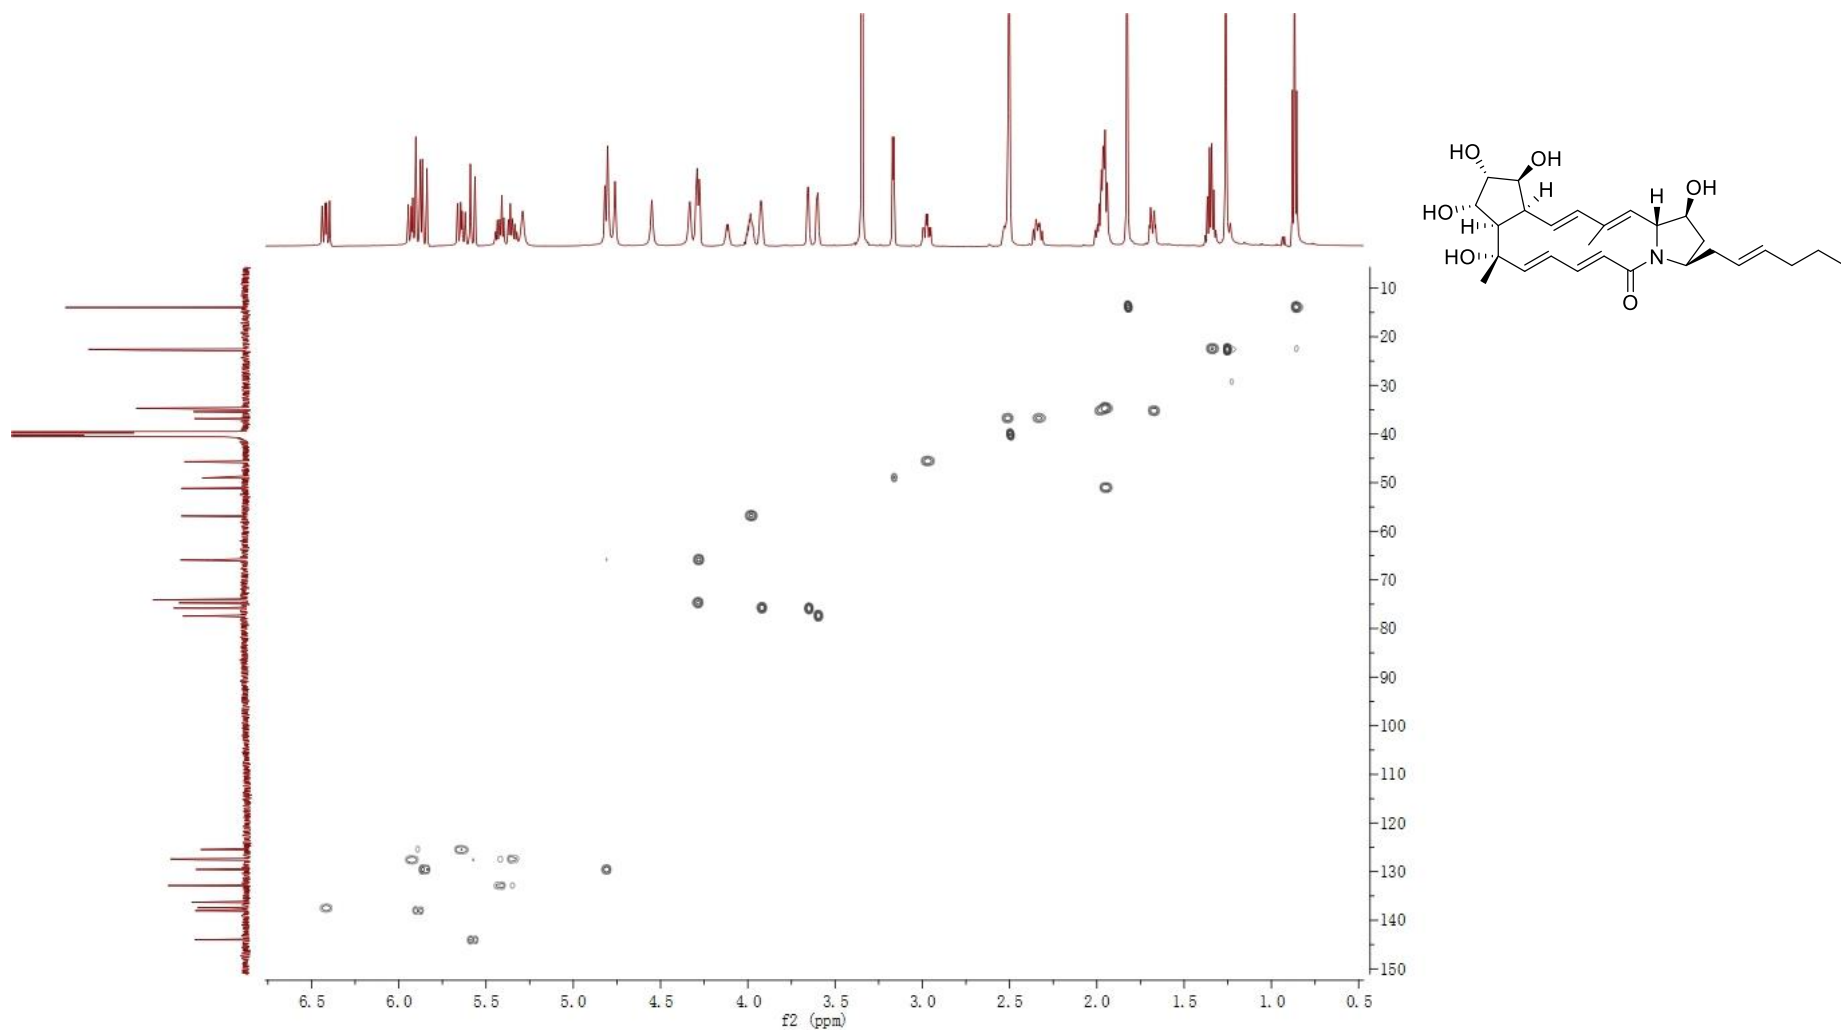

Figure S21. HSQC spectrum of compound 3

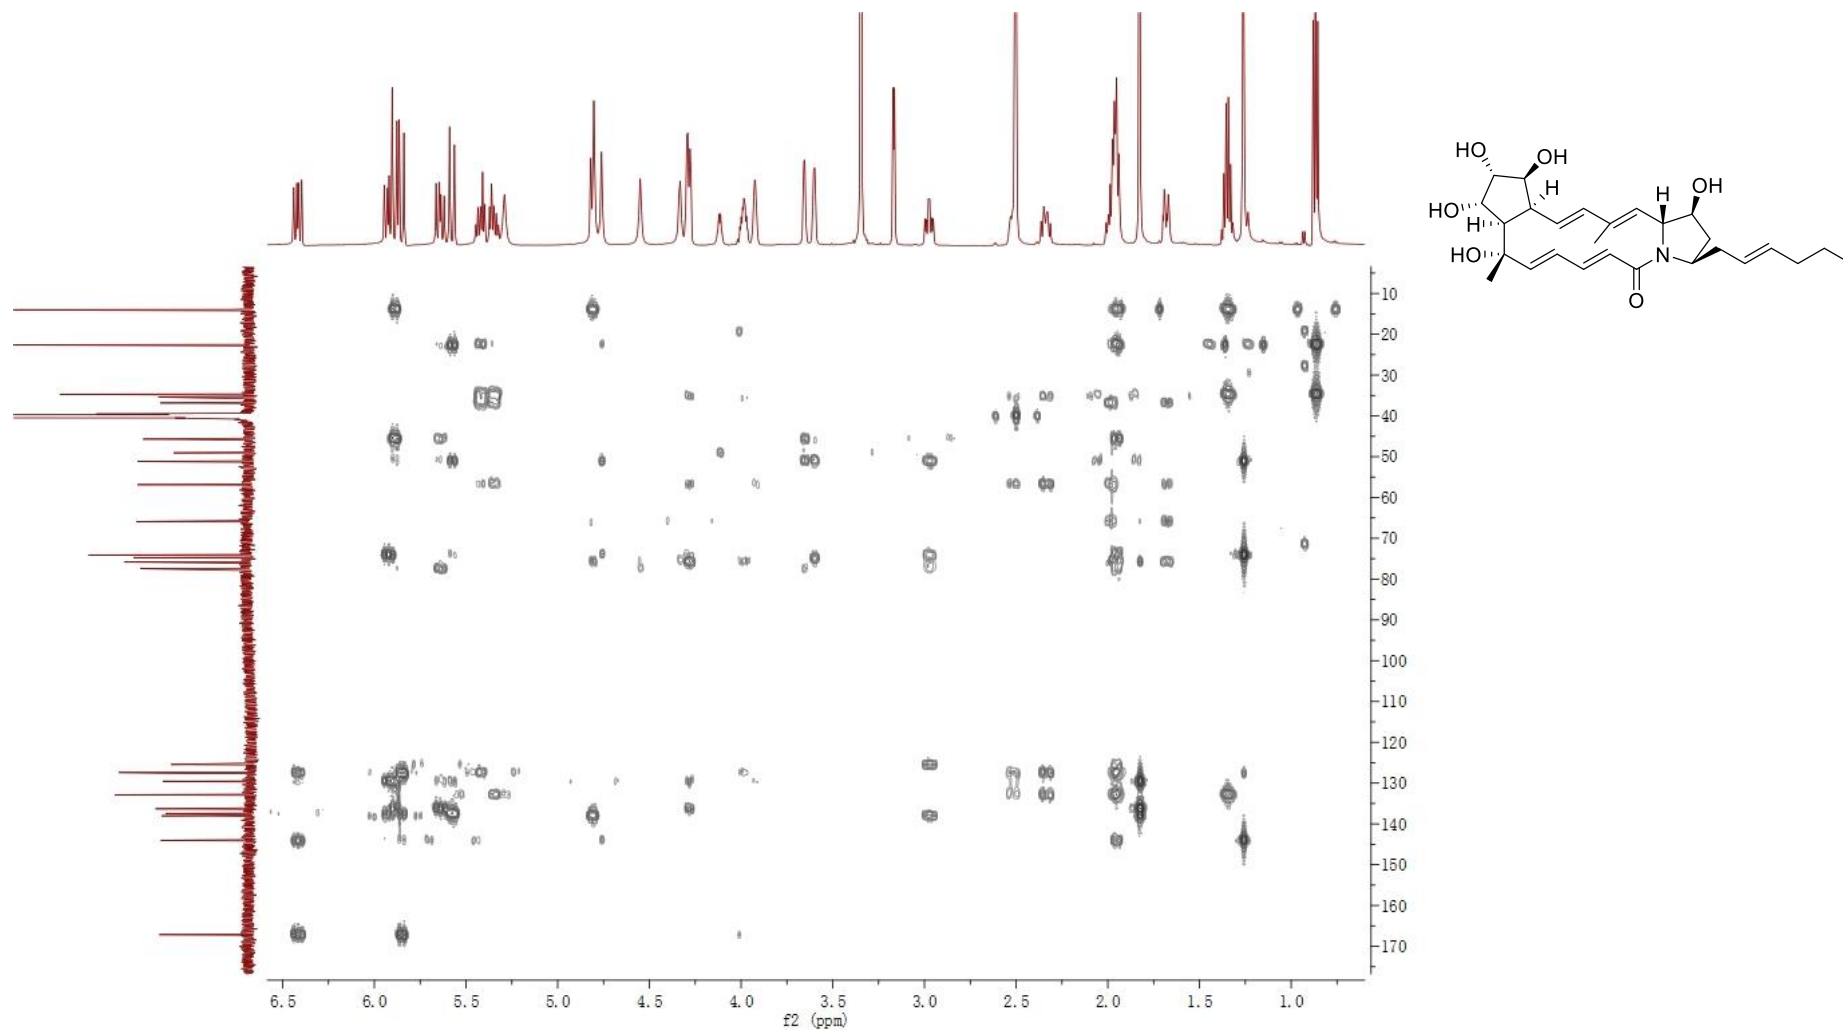

Figure S22. HMBC spectrum of compound **3**



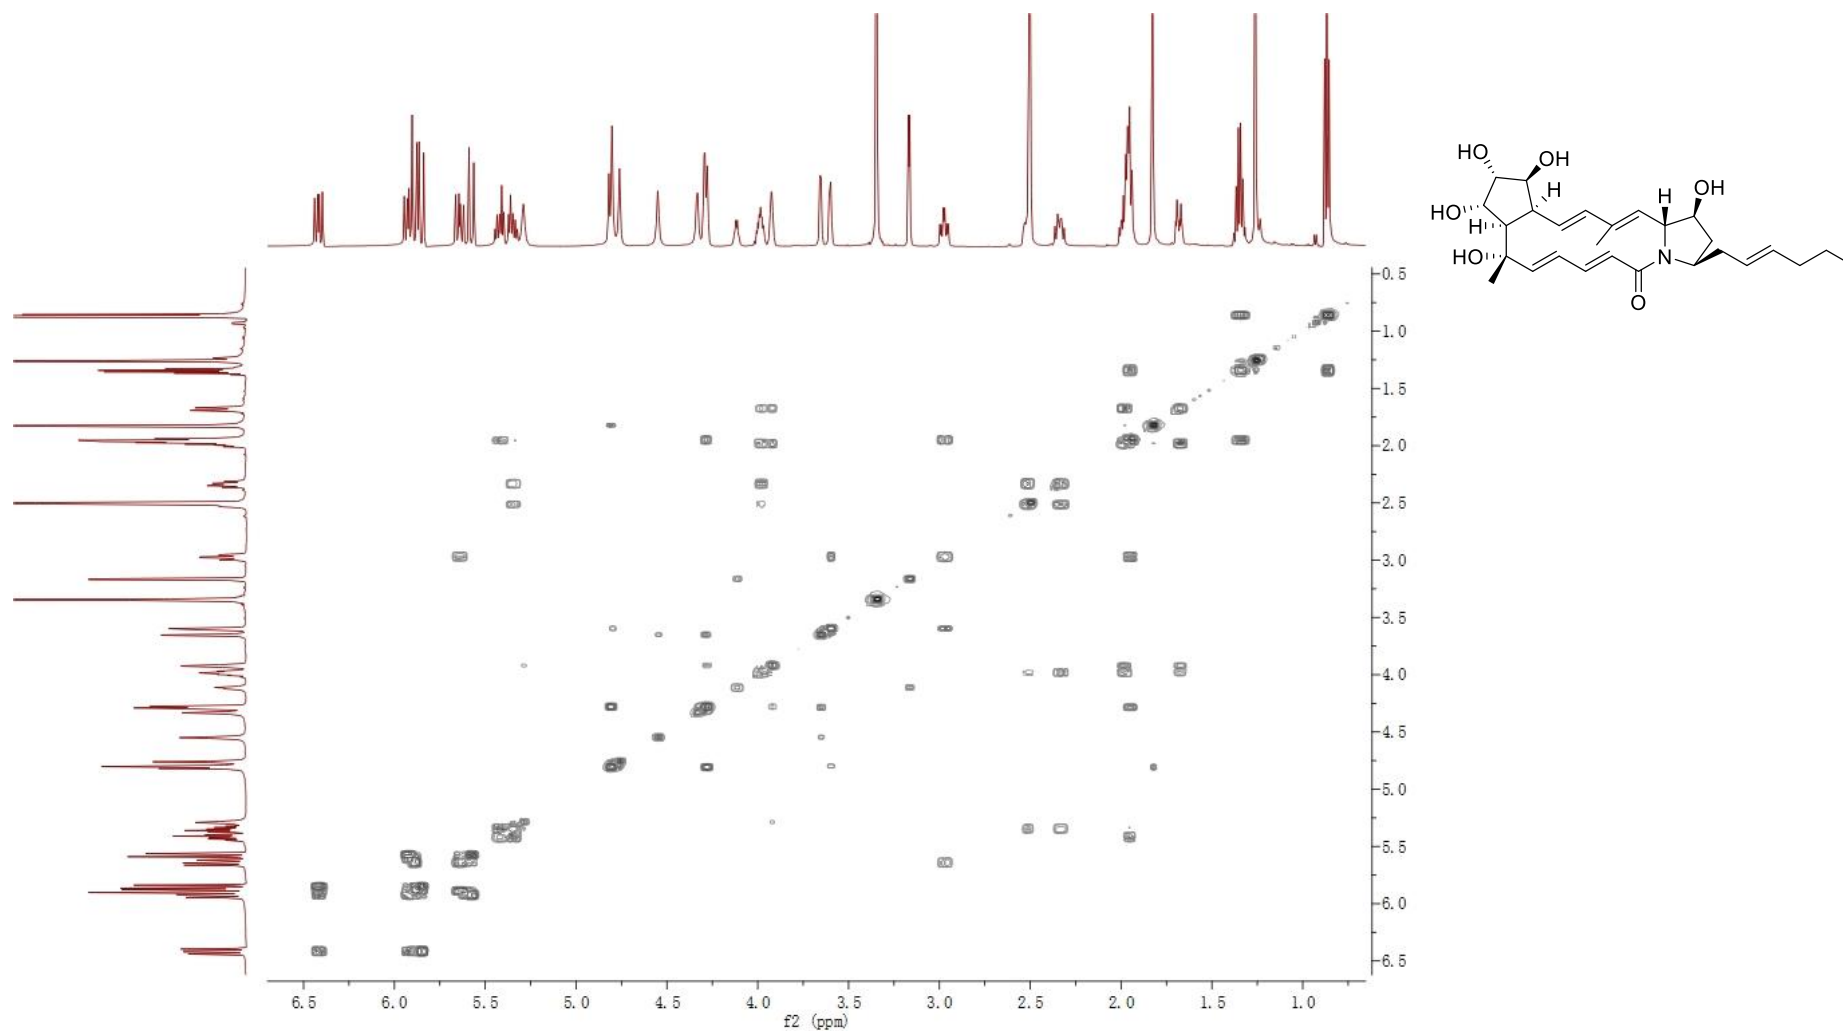

Figure S23. COSY spectrum of compound **3**

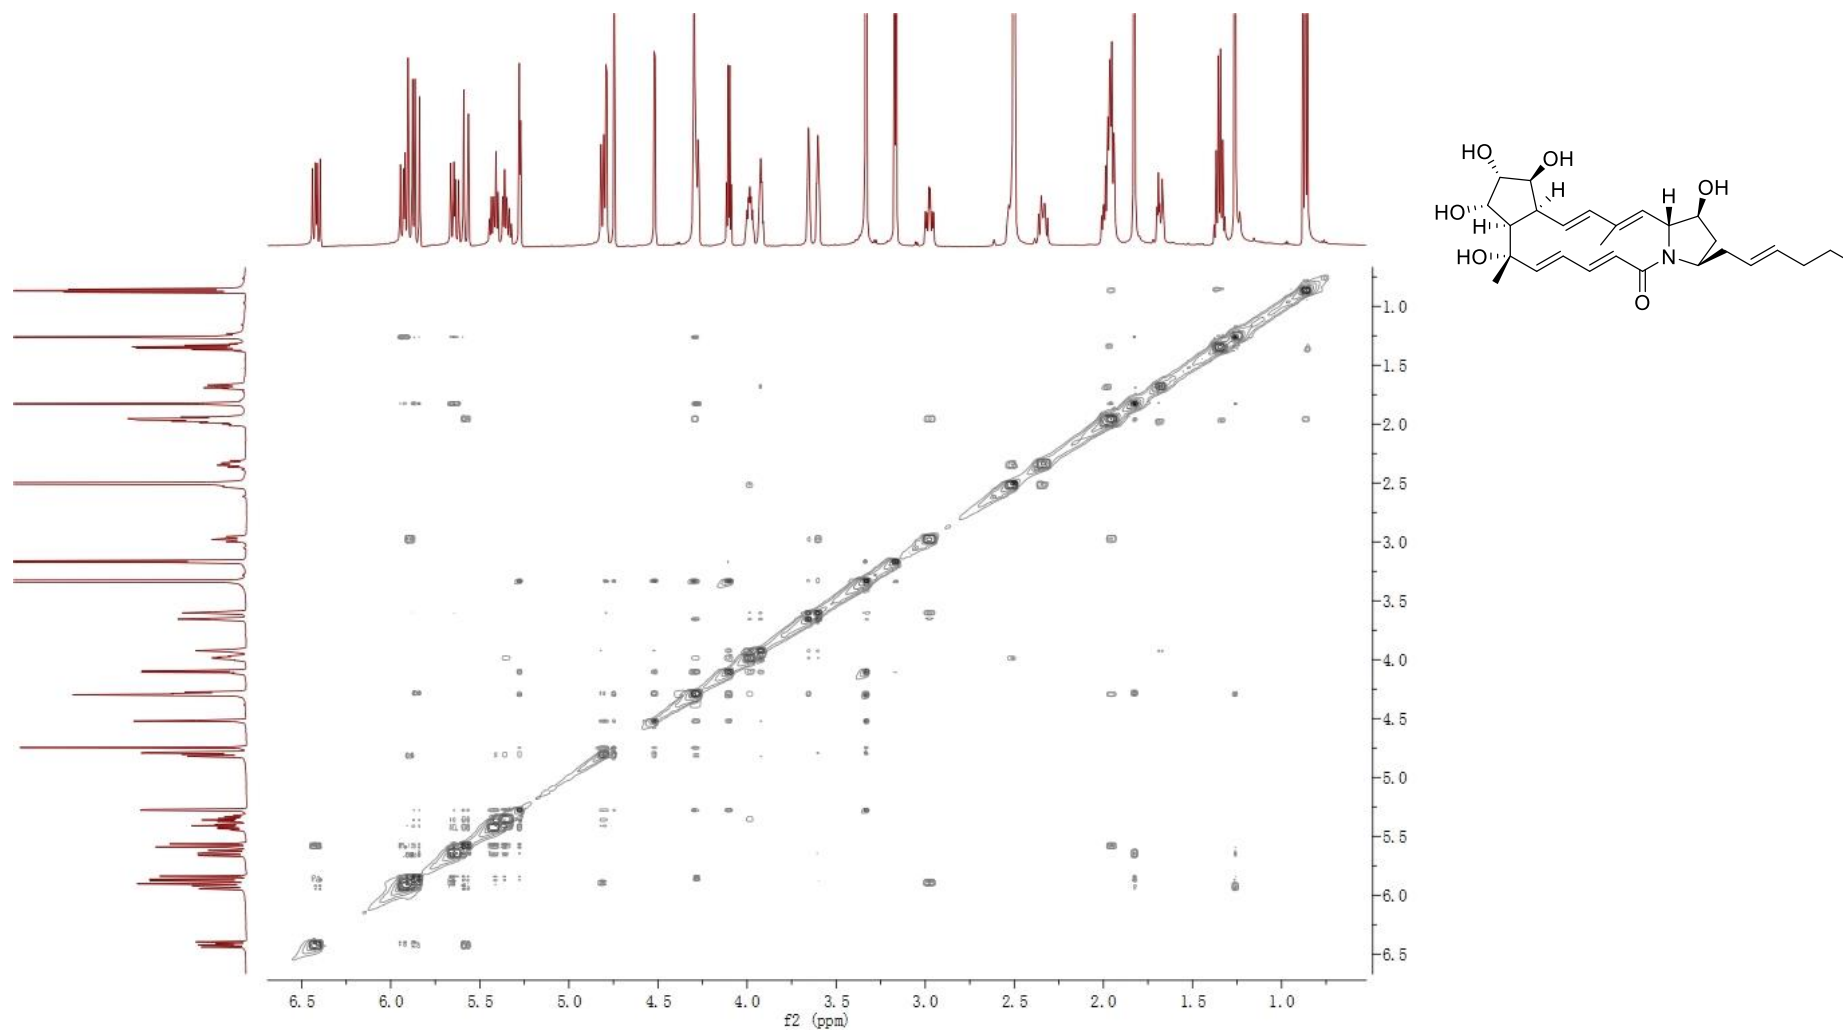

Figure S24. NOESY spectrum of compound **3**

## User Spectra

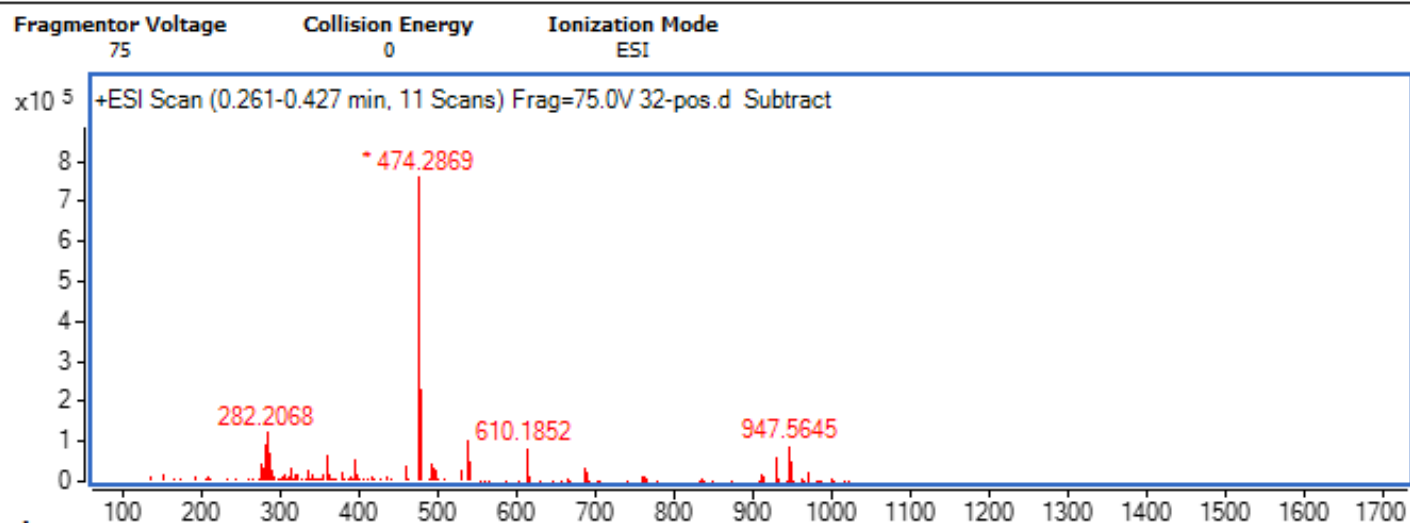

Figure S25. HRESIMS spectrum of compound **4**

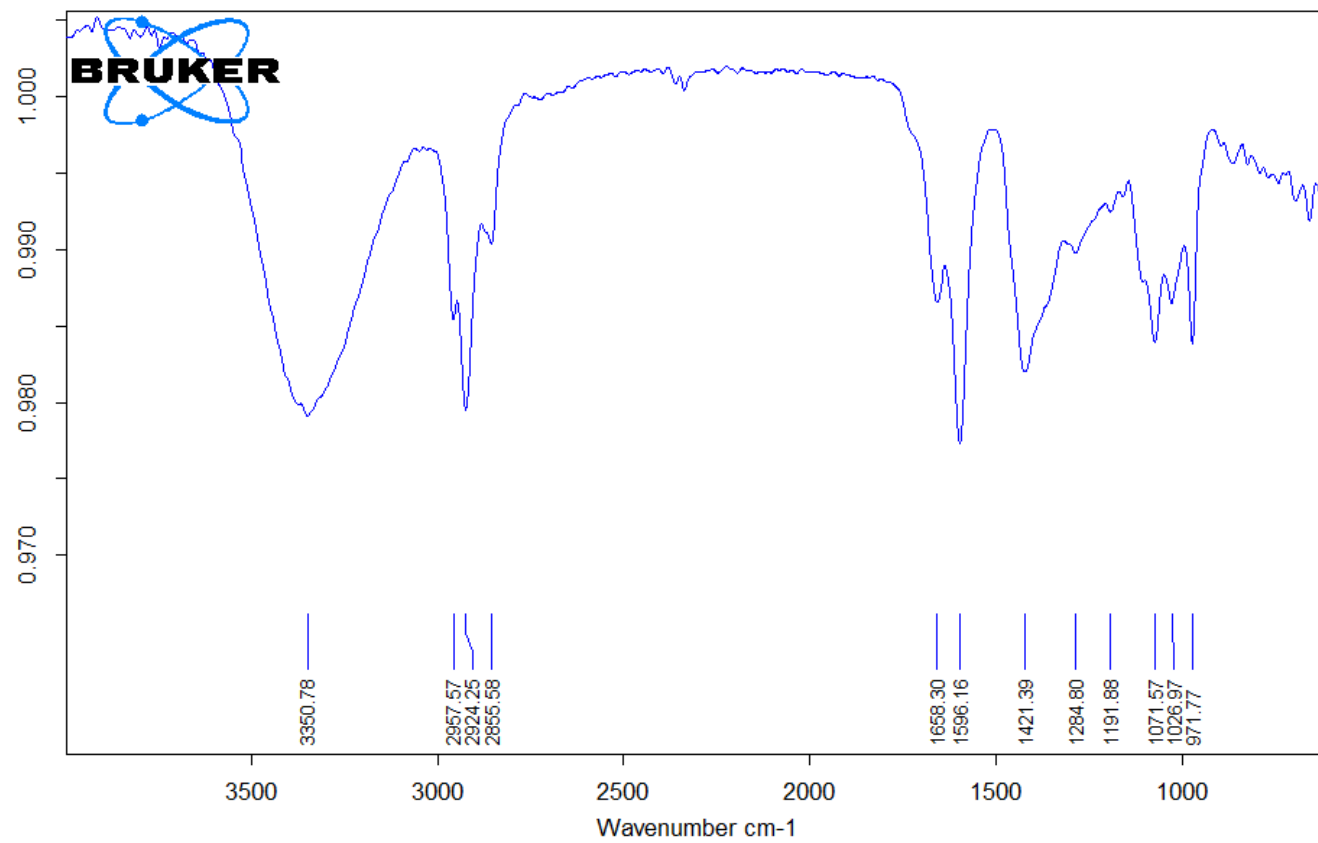

Figure S26. IR spectrum of compound 4

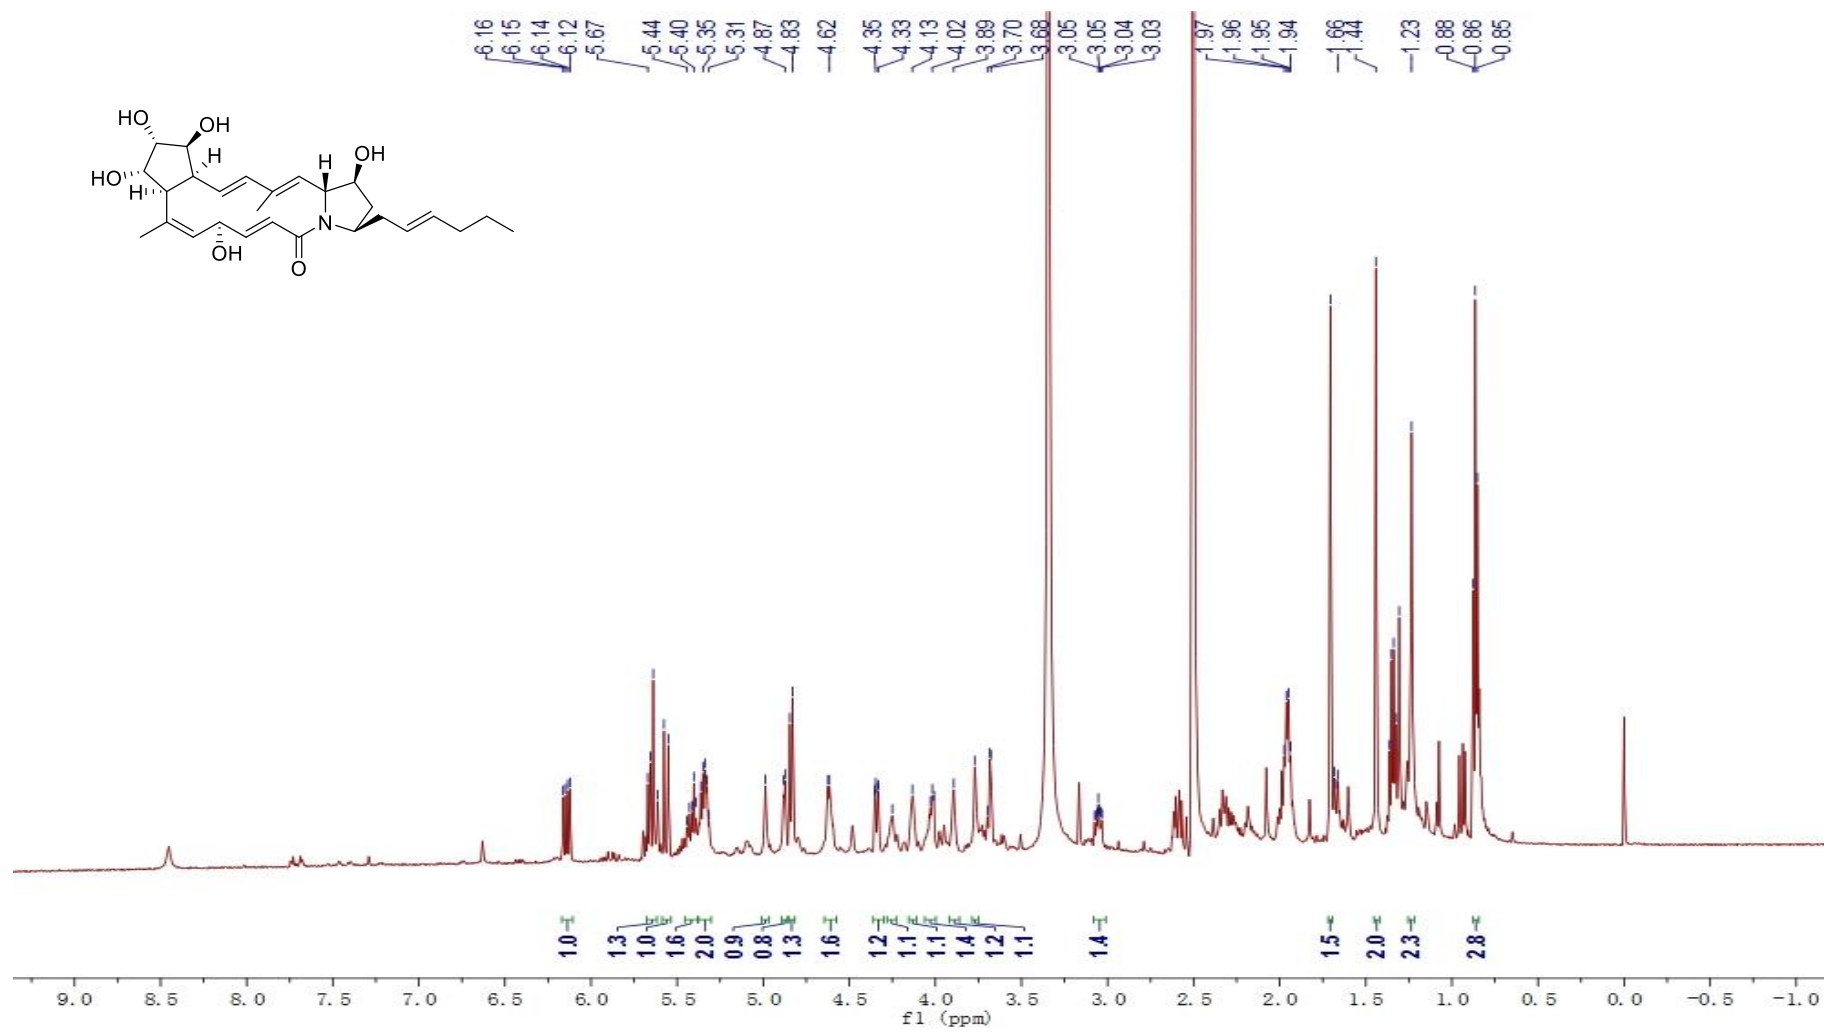

Figure S27. <sup>1</sup>H NMR (600 MHz, DMSO-*d*<sub>6</sub>) spectrum of compound **4**

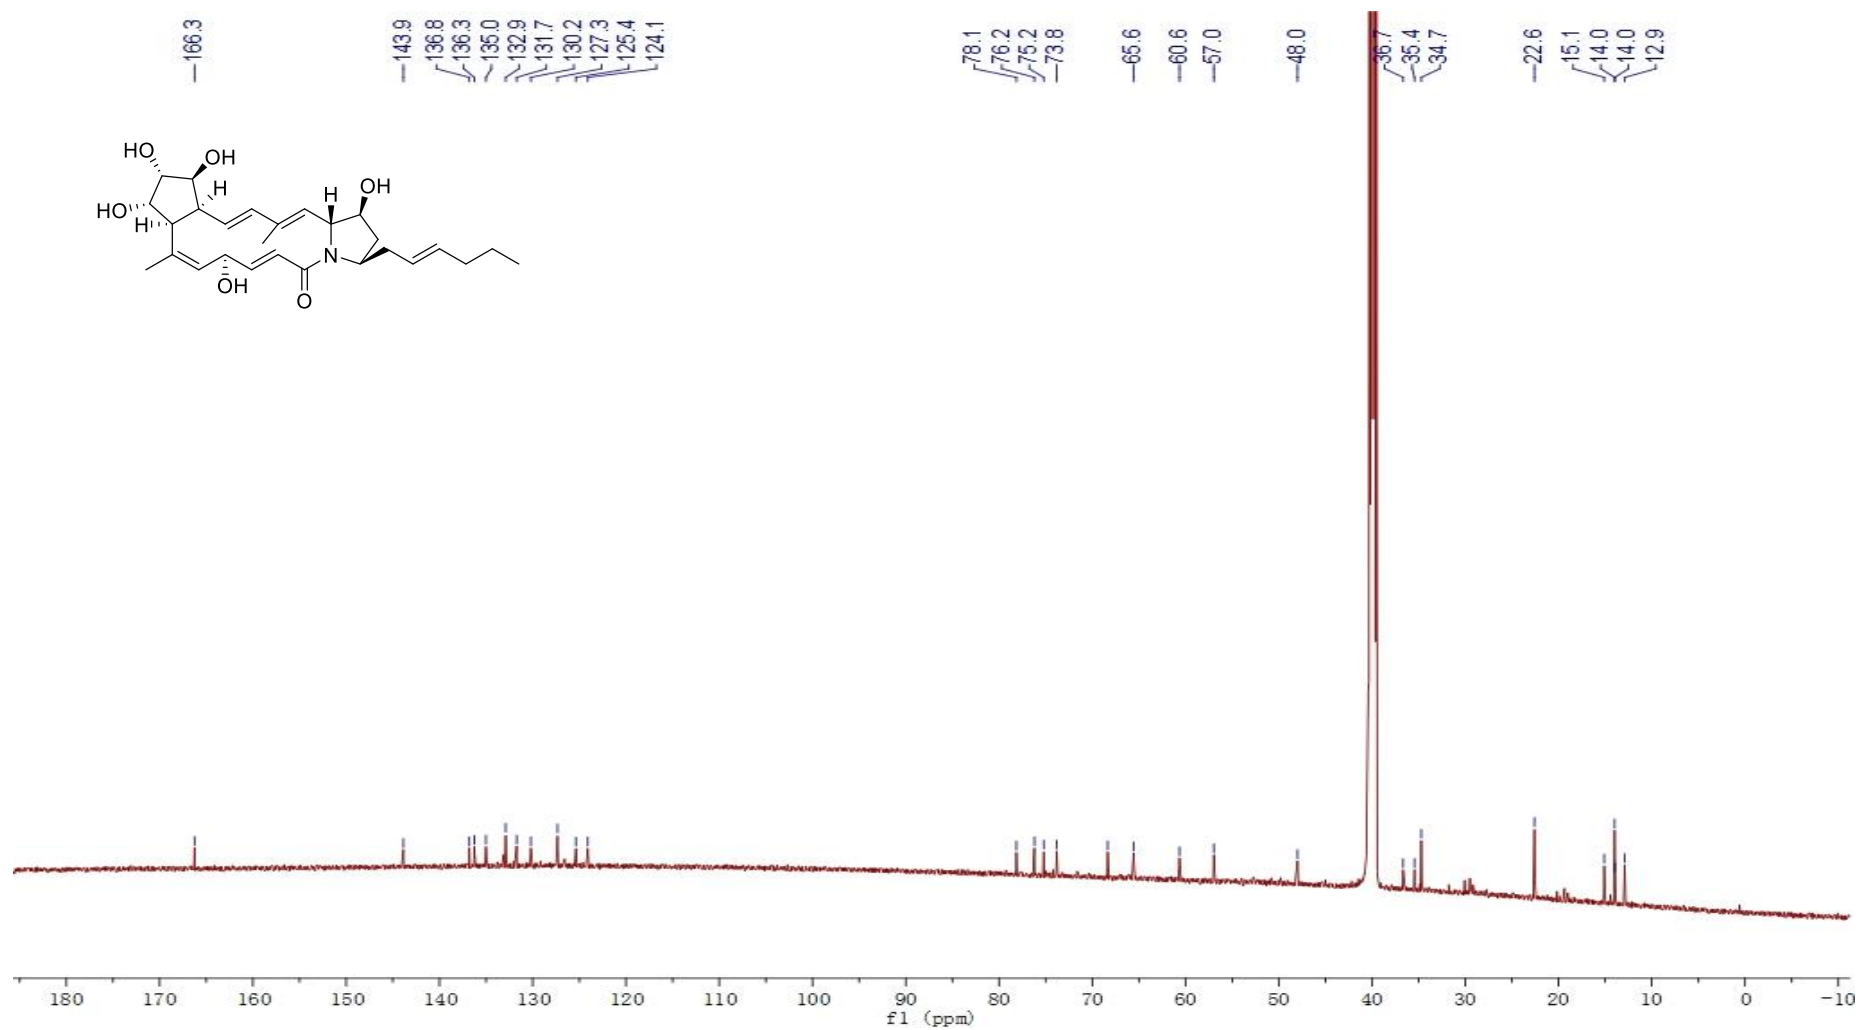

Figure S28. <sup>13</sup>C NMR (150 MHz, DMSO-*d*<sub>6</sub>) spectrum of compound **4**

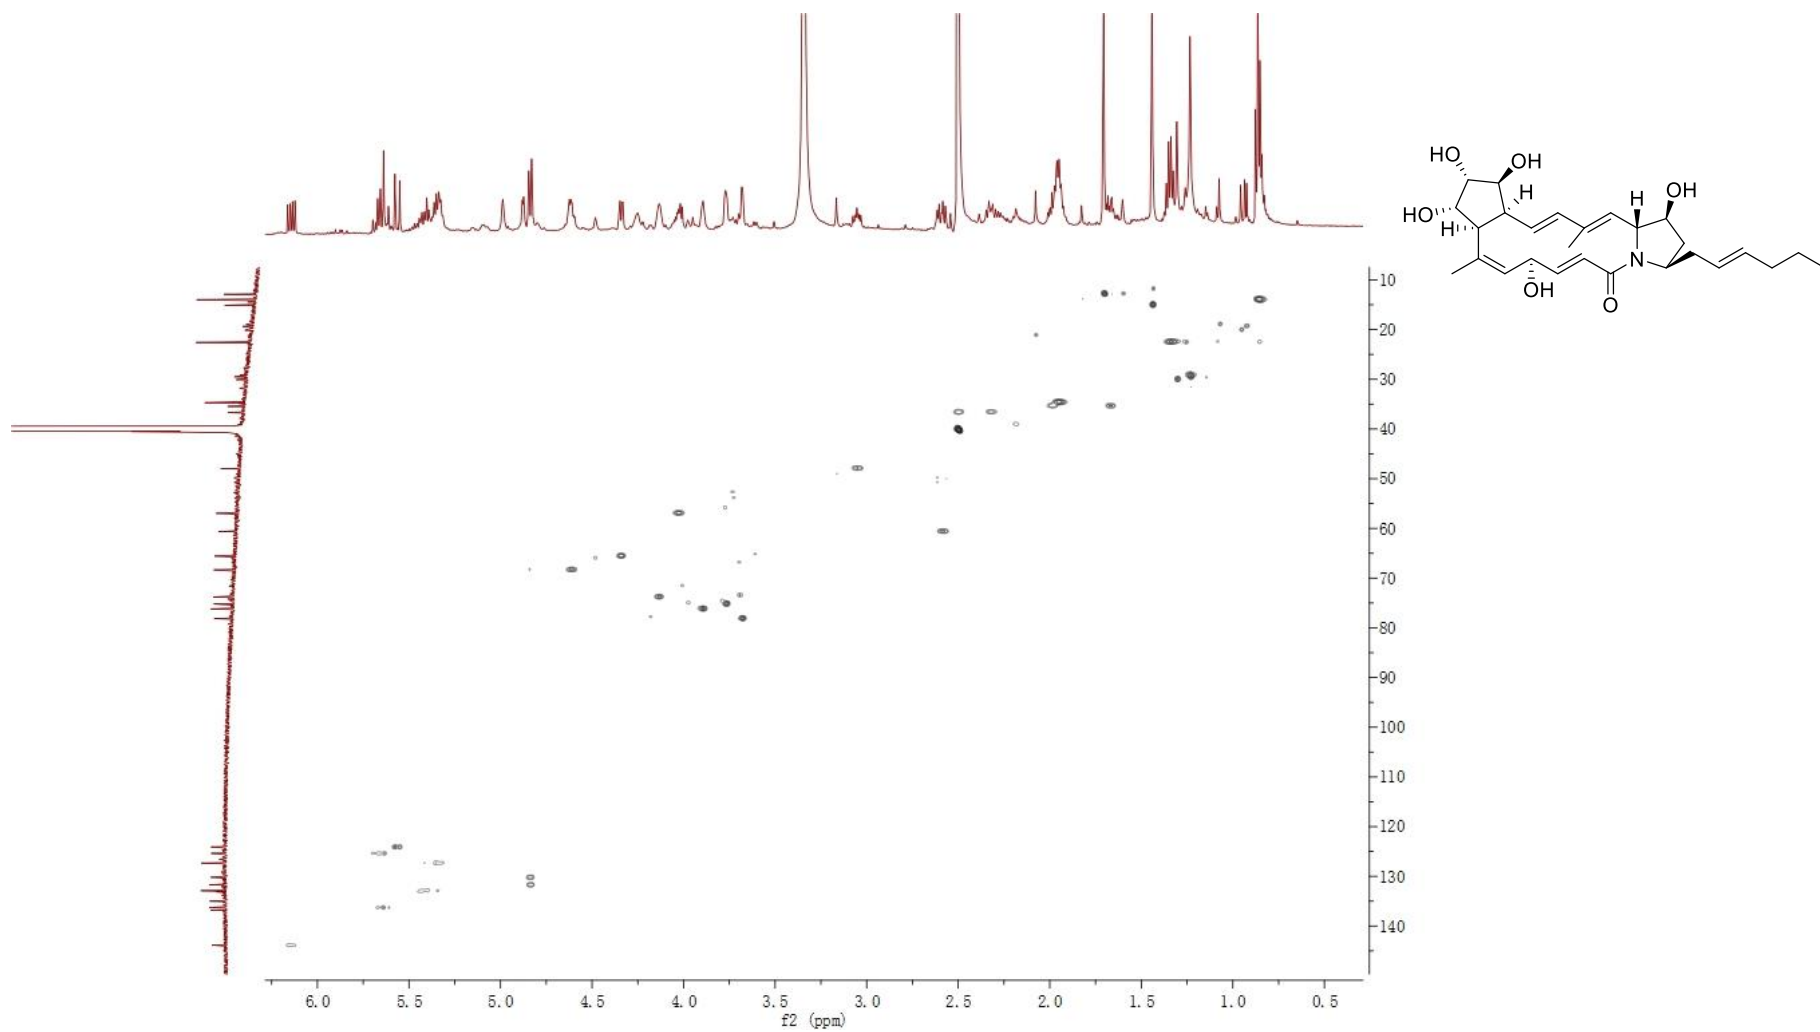

Figure S29. HSQC spectrum of compound 4

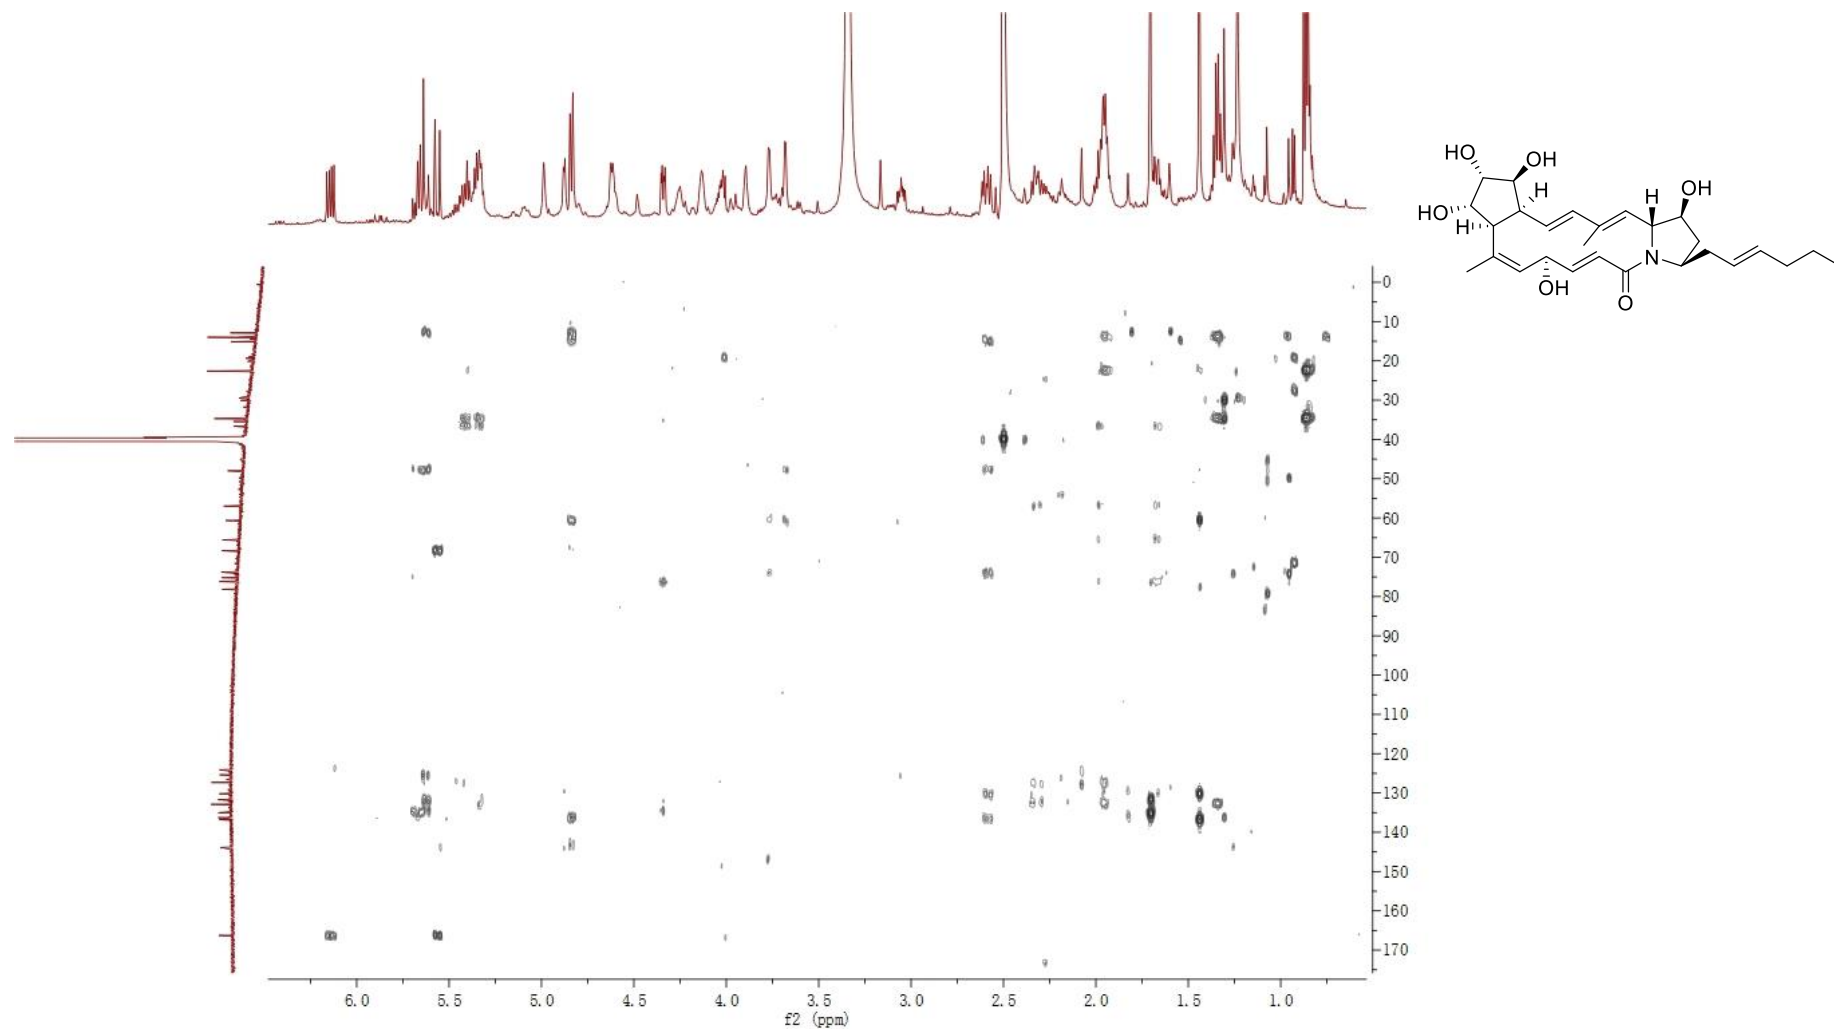

Figure S30. HMBC spectrum of compound **4**



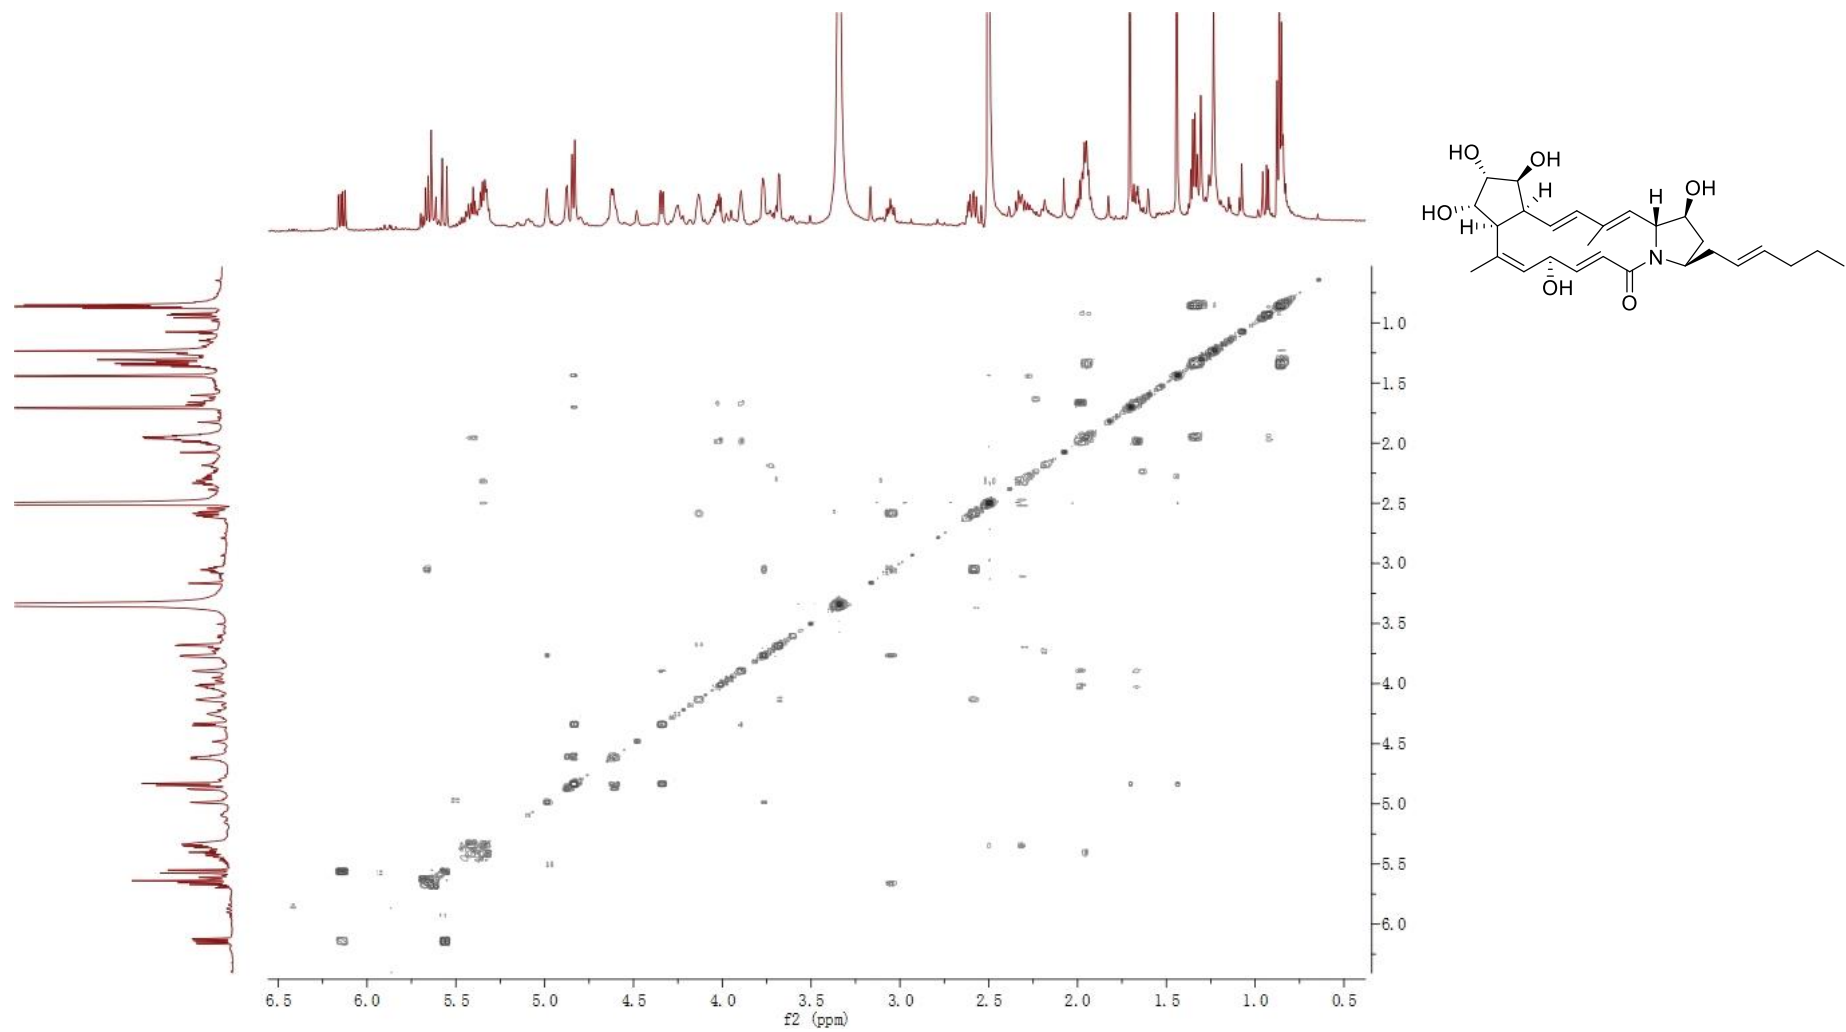

Figure S31. COSY spectrum of compound 4

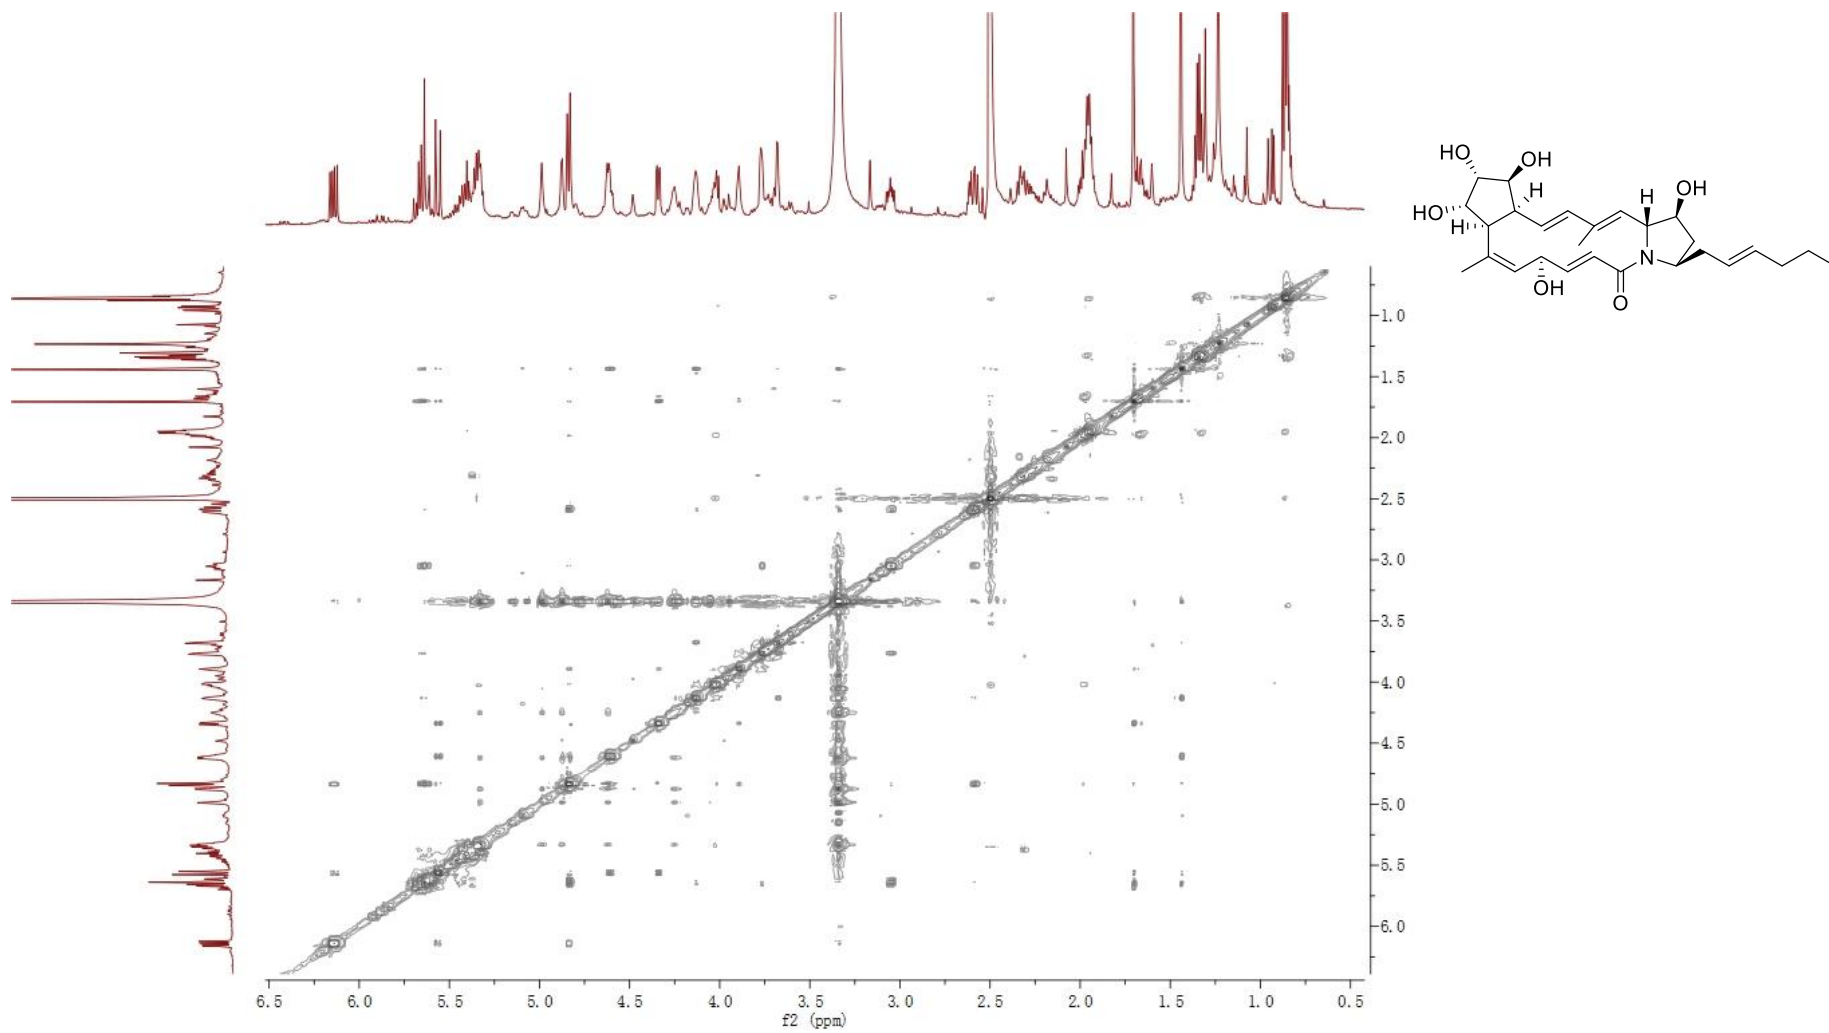

Figure S32. NOESY spectrum of compound 4

## User Spectra

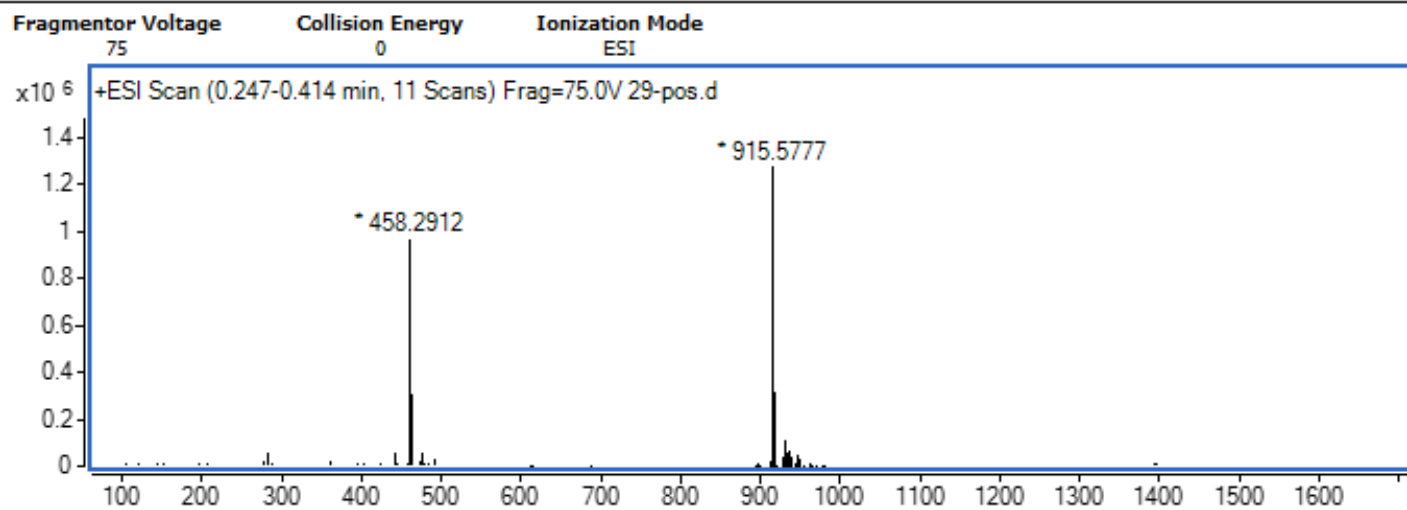

Figure S33. HRESIMS spectrum of compound **5**

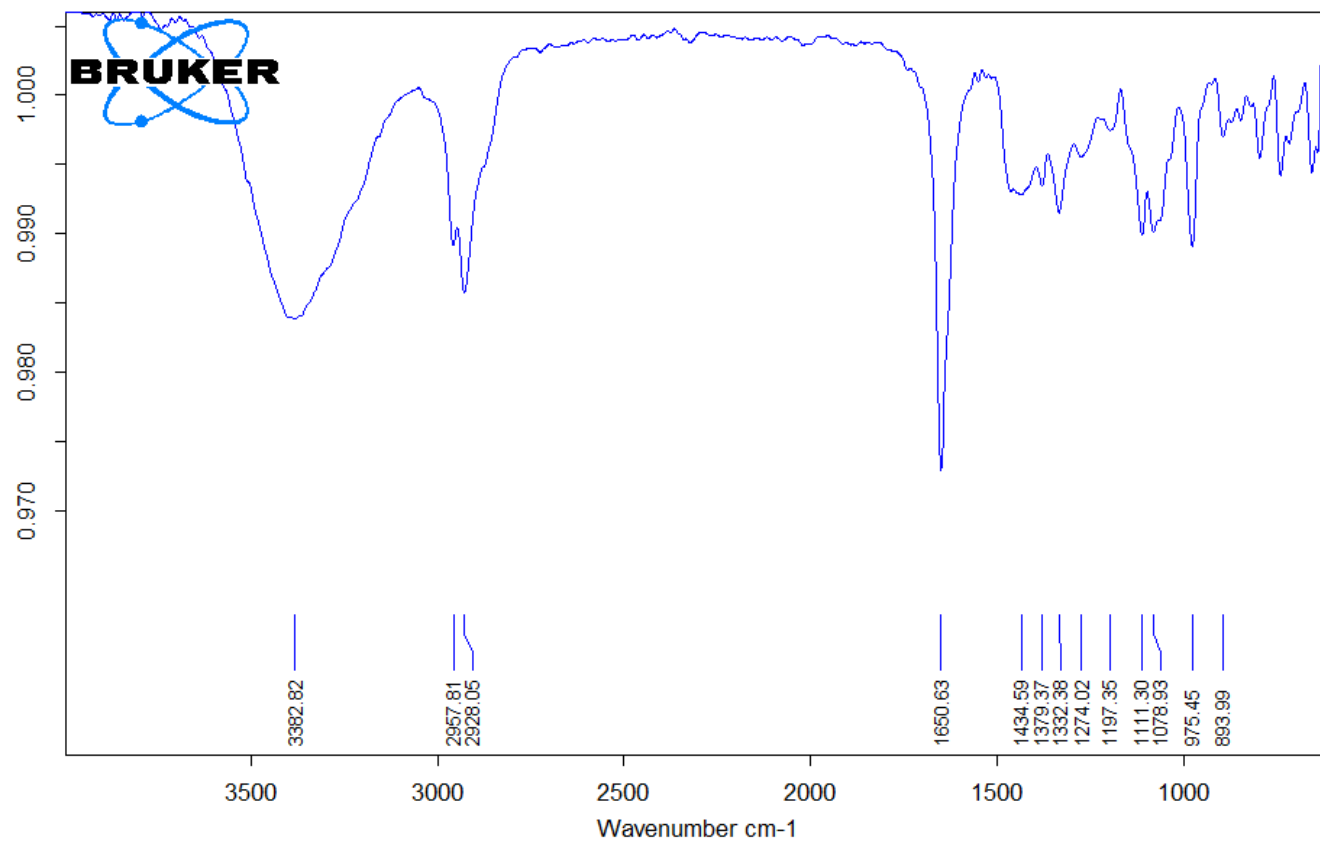

Figure S34. IR spectrum of compound **5**

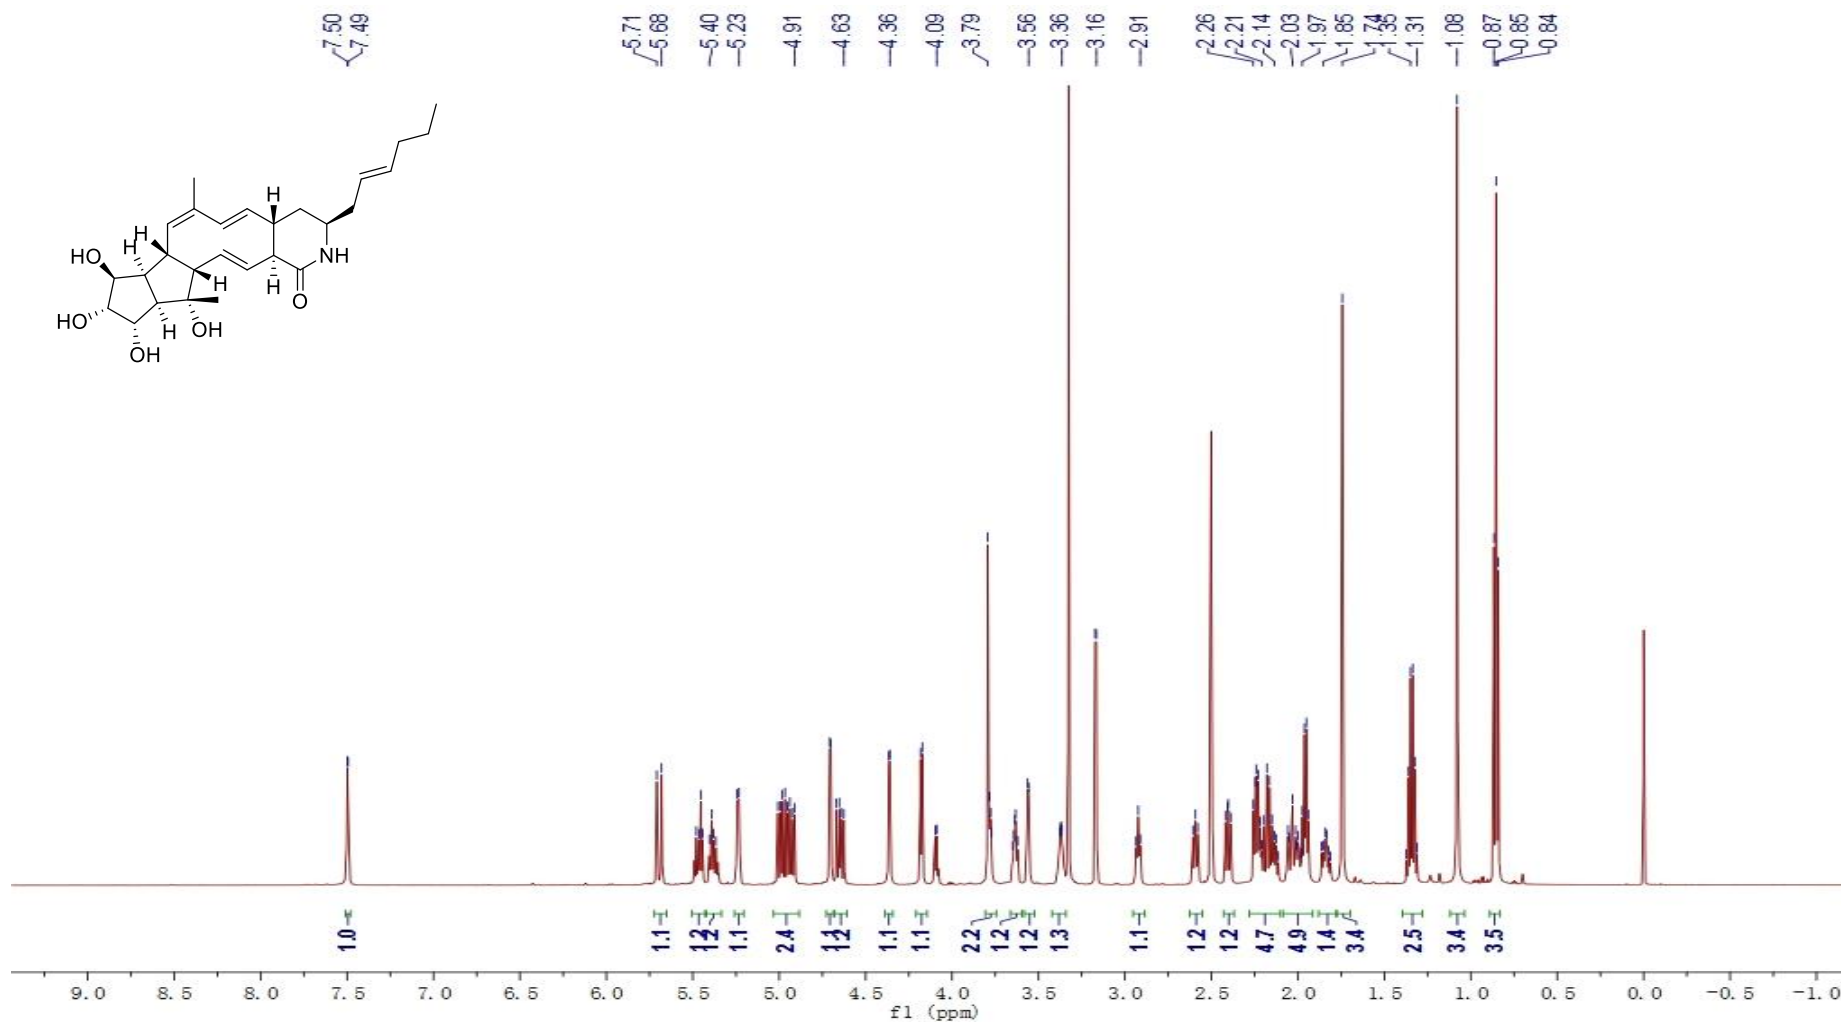

Figure S35. <sup>1</sup>H NMR (600 MHz, DMSO-*d*<sub>6</sub>) spectrum of compound **5**

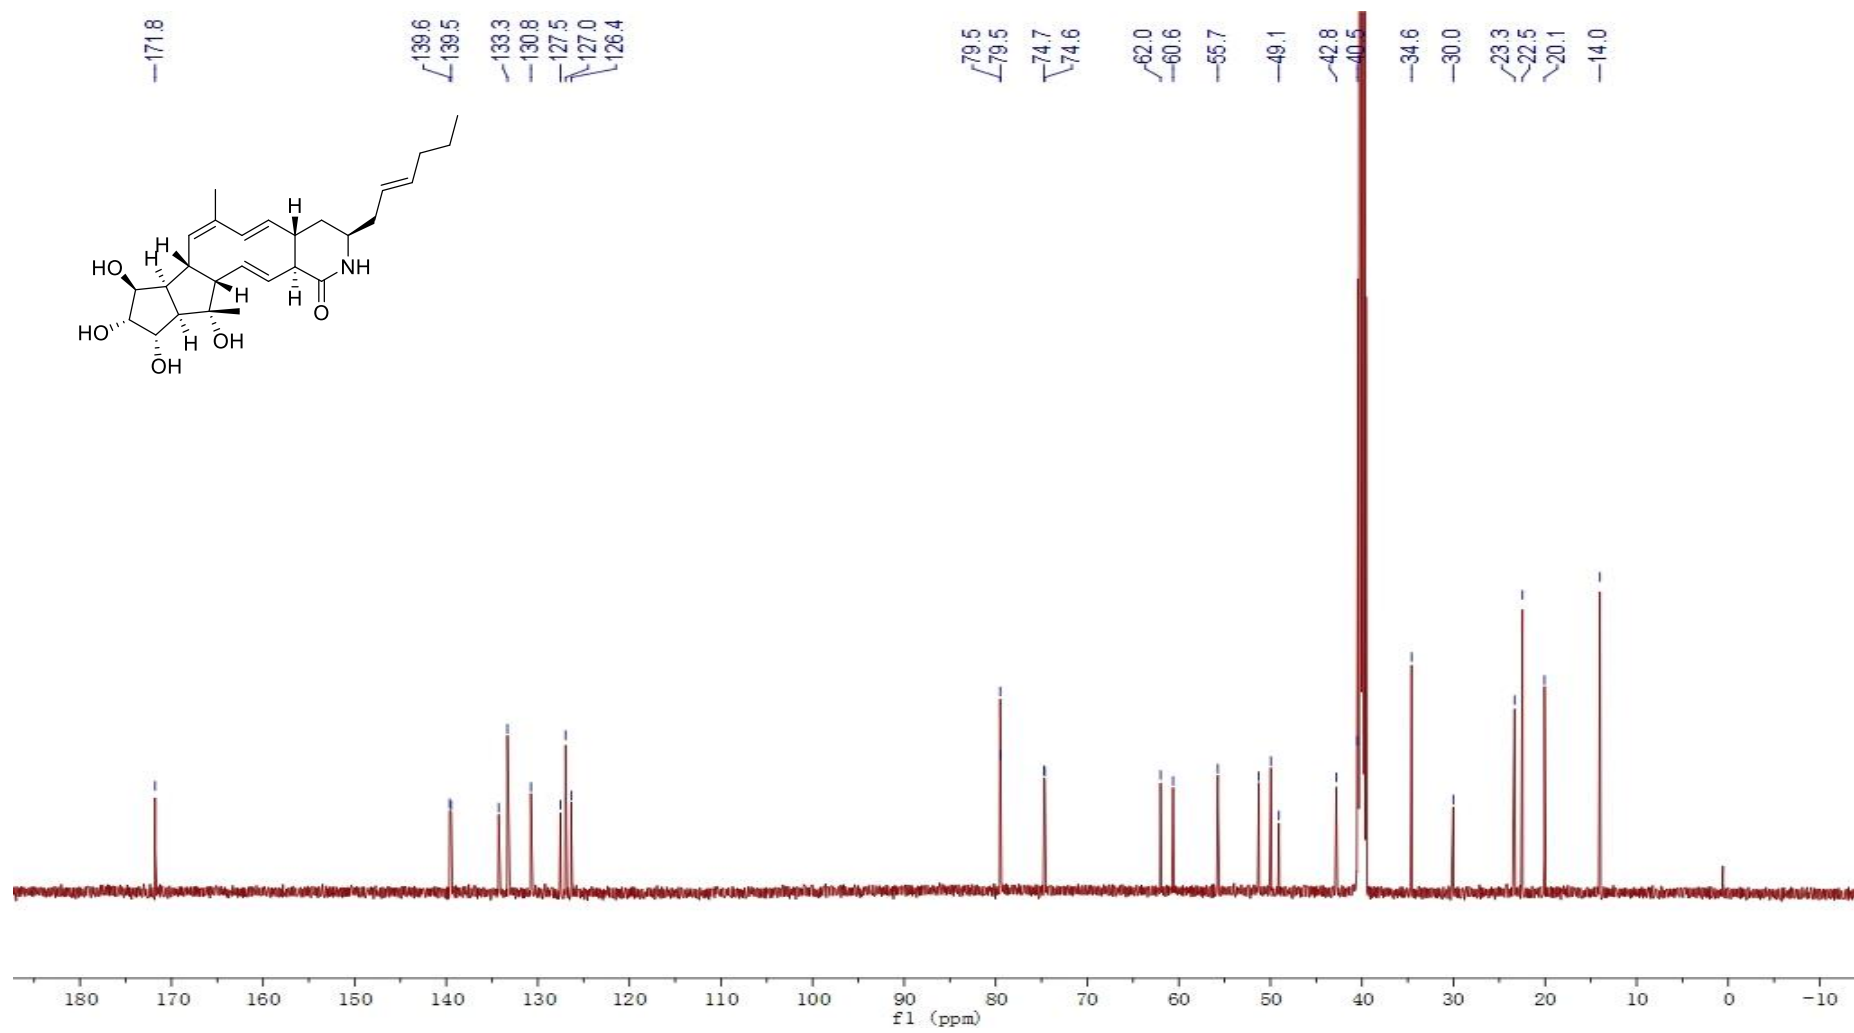

Figure S36. <sup>13</sup>C NMR (150 MHz, DMSO-*d*<sub>6</sub>) spectrum of compound **5**

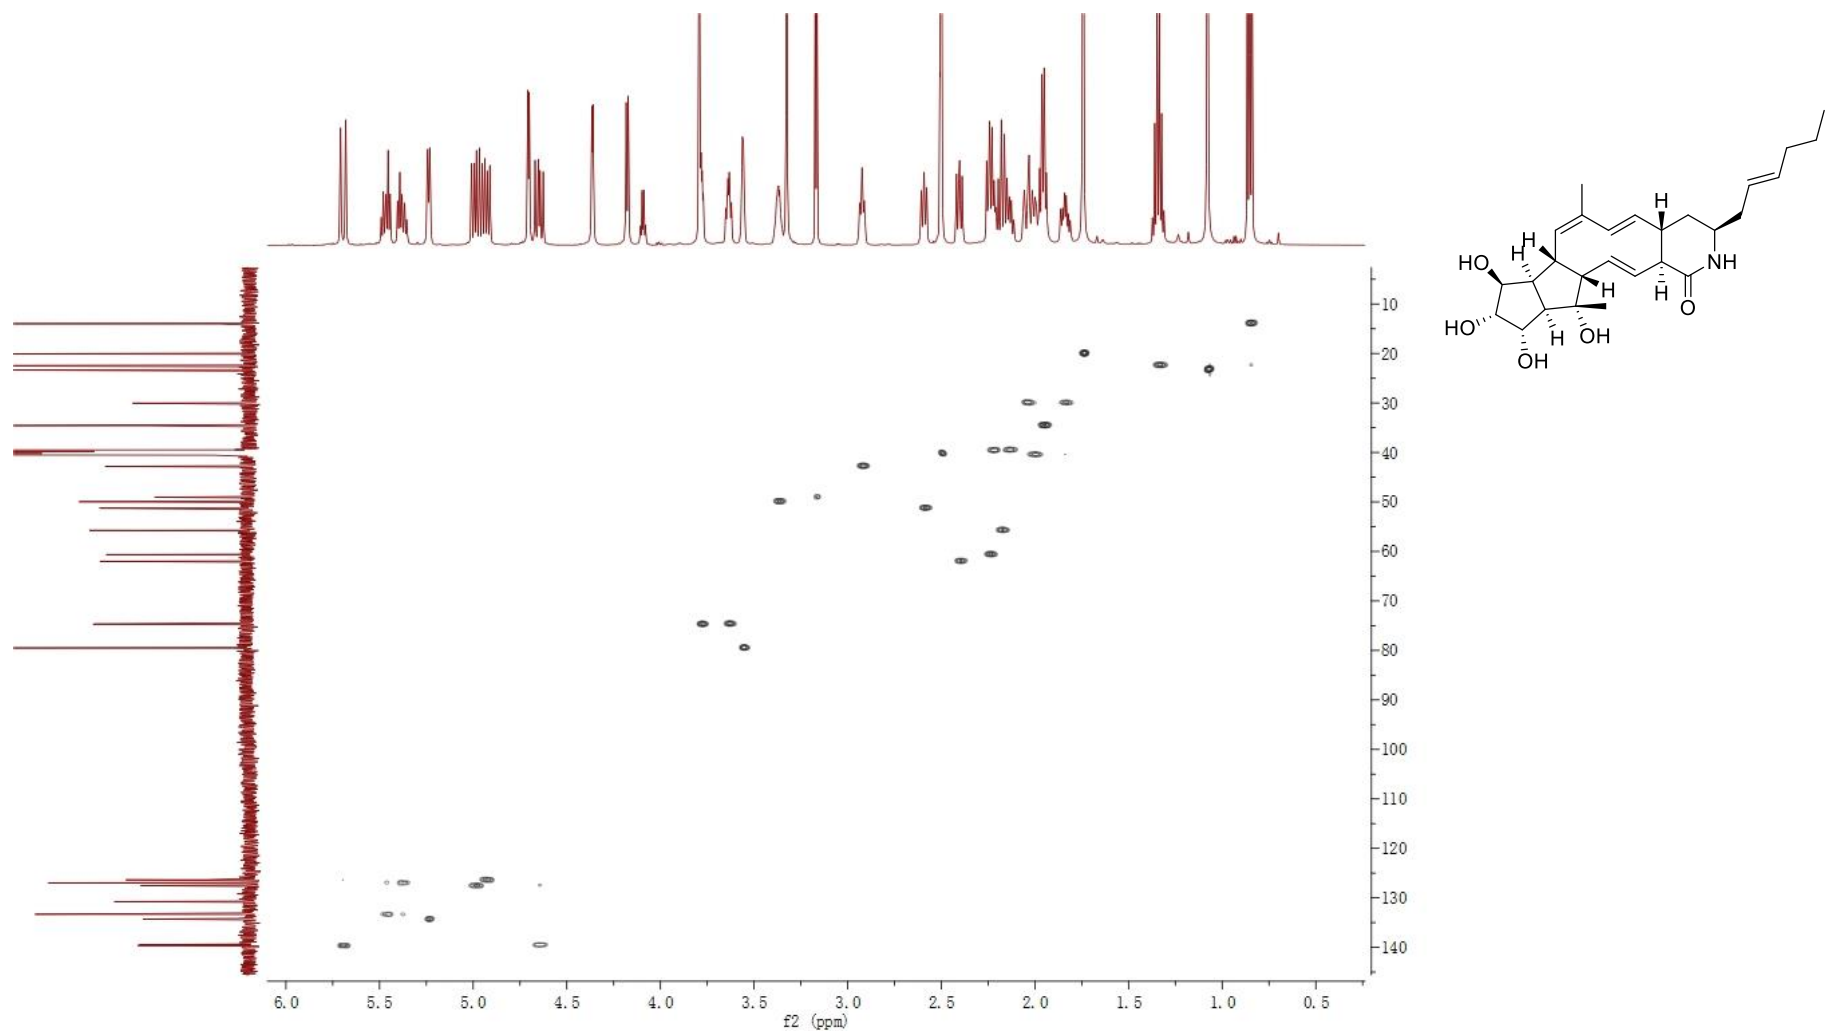

Figure S37. HSQC spectrum of compound **5**

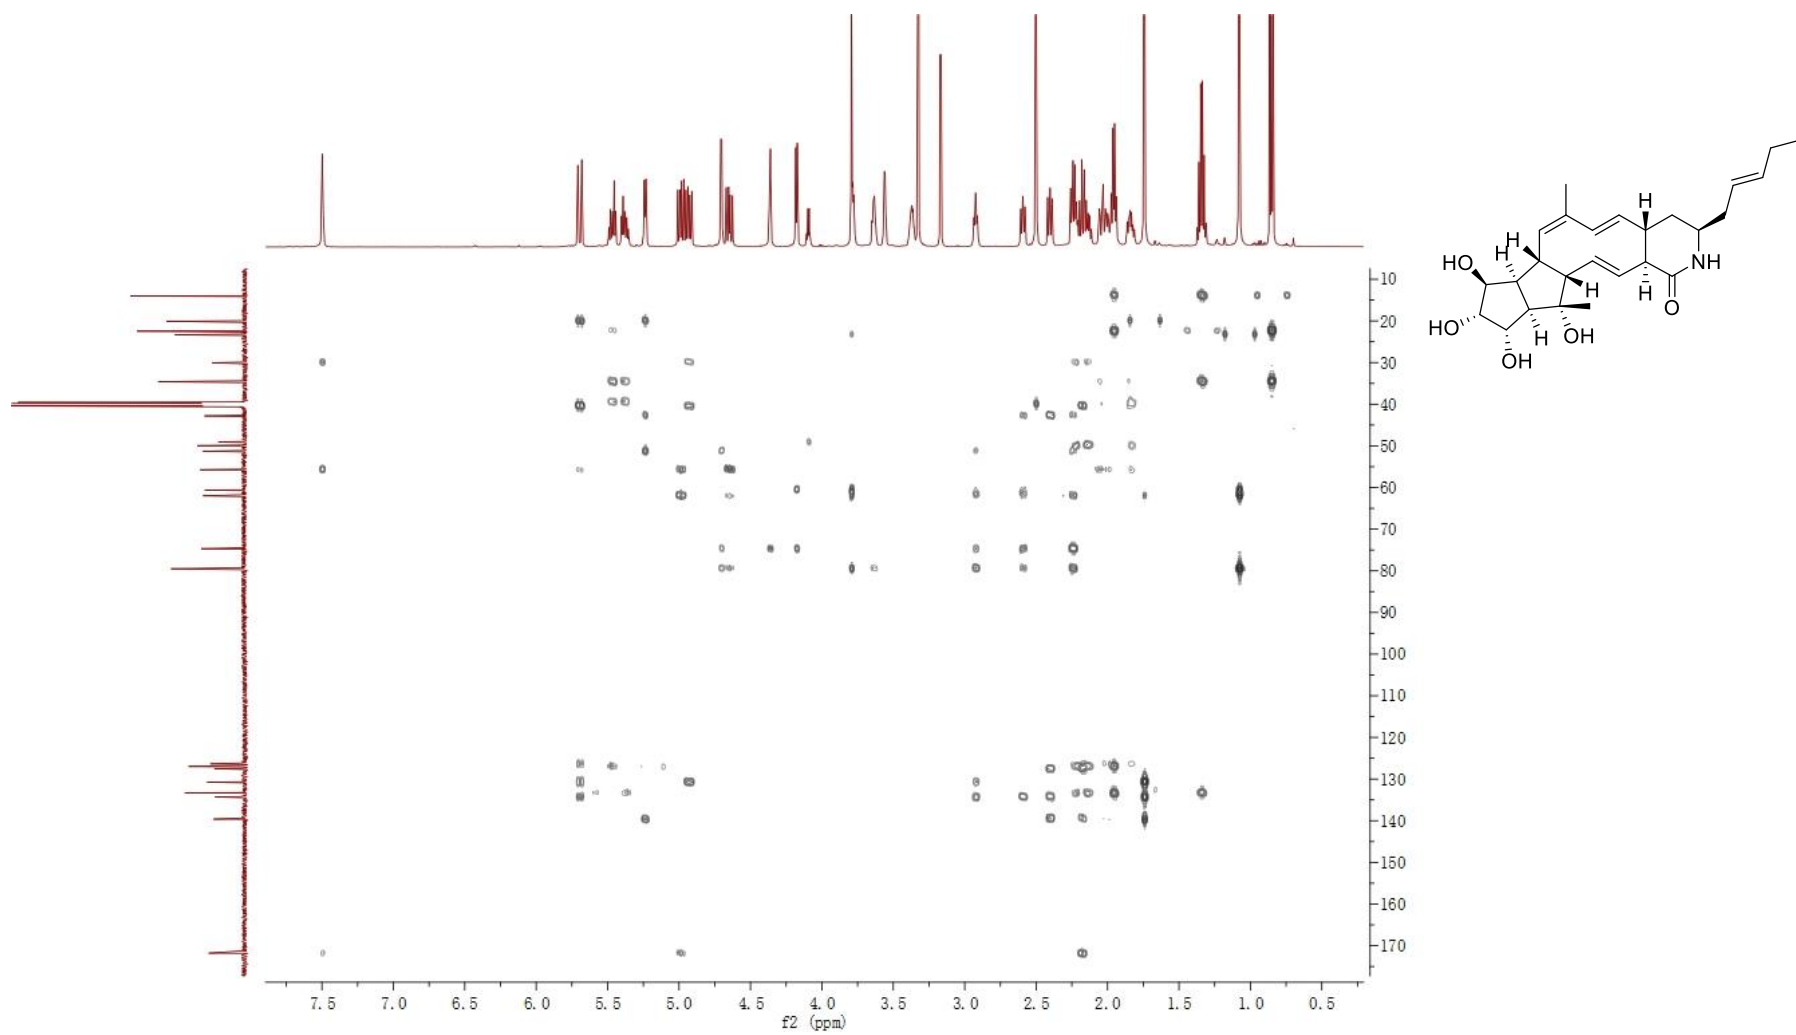

Figure S38. HMBC spectrum of compound 5



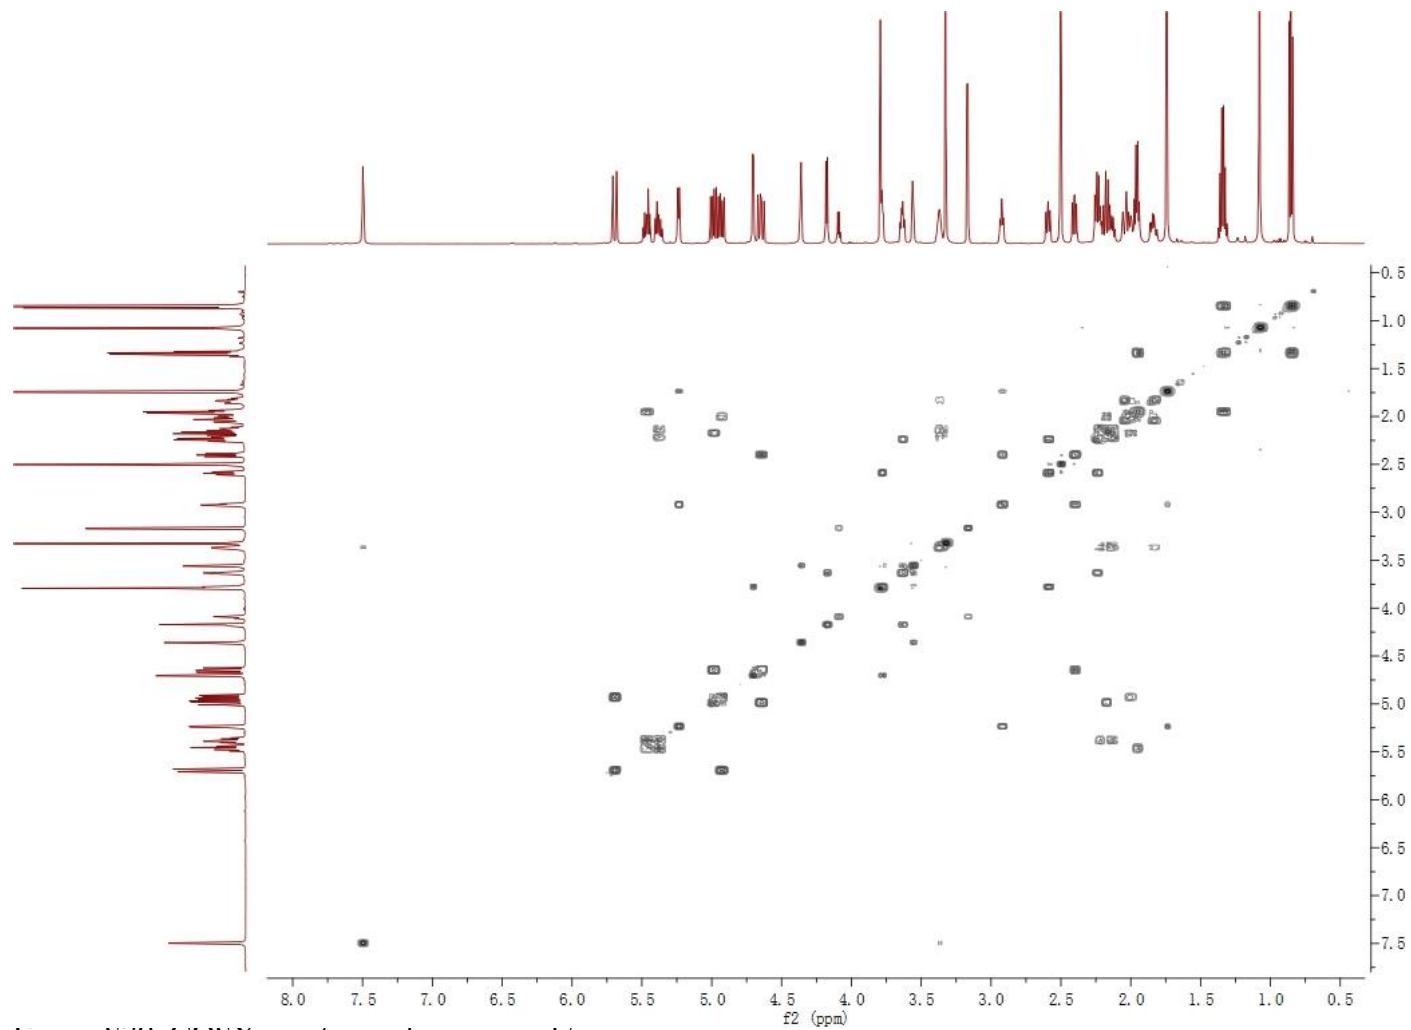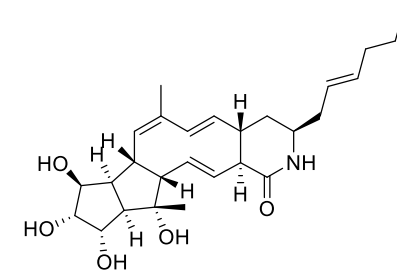

Figure S39. COSY spectrum of compound 5

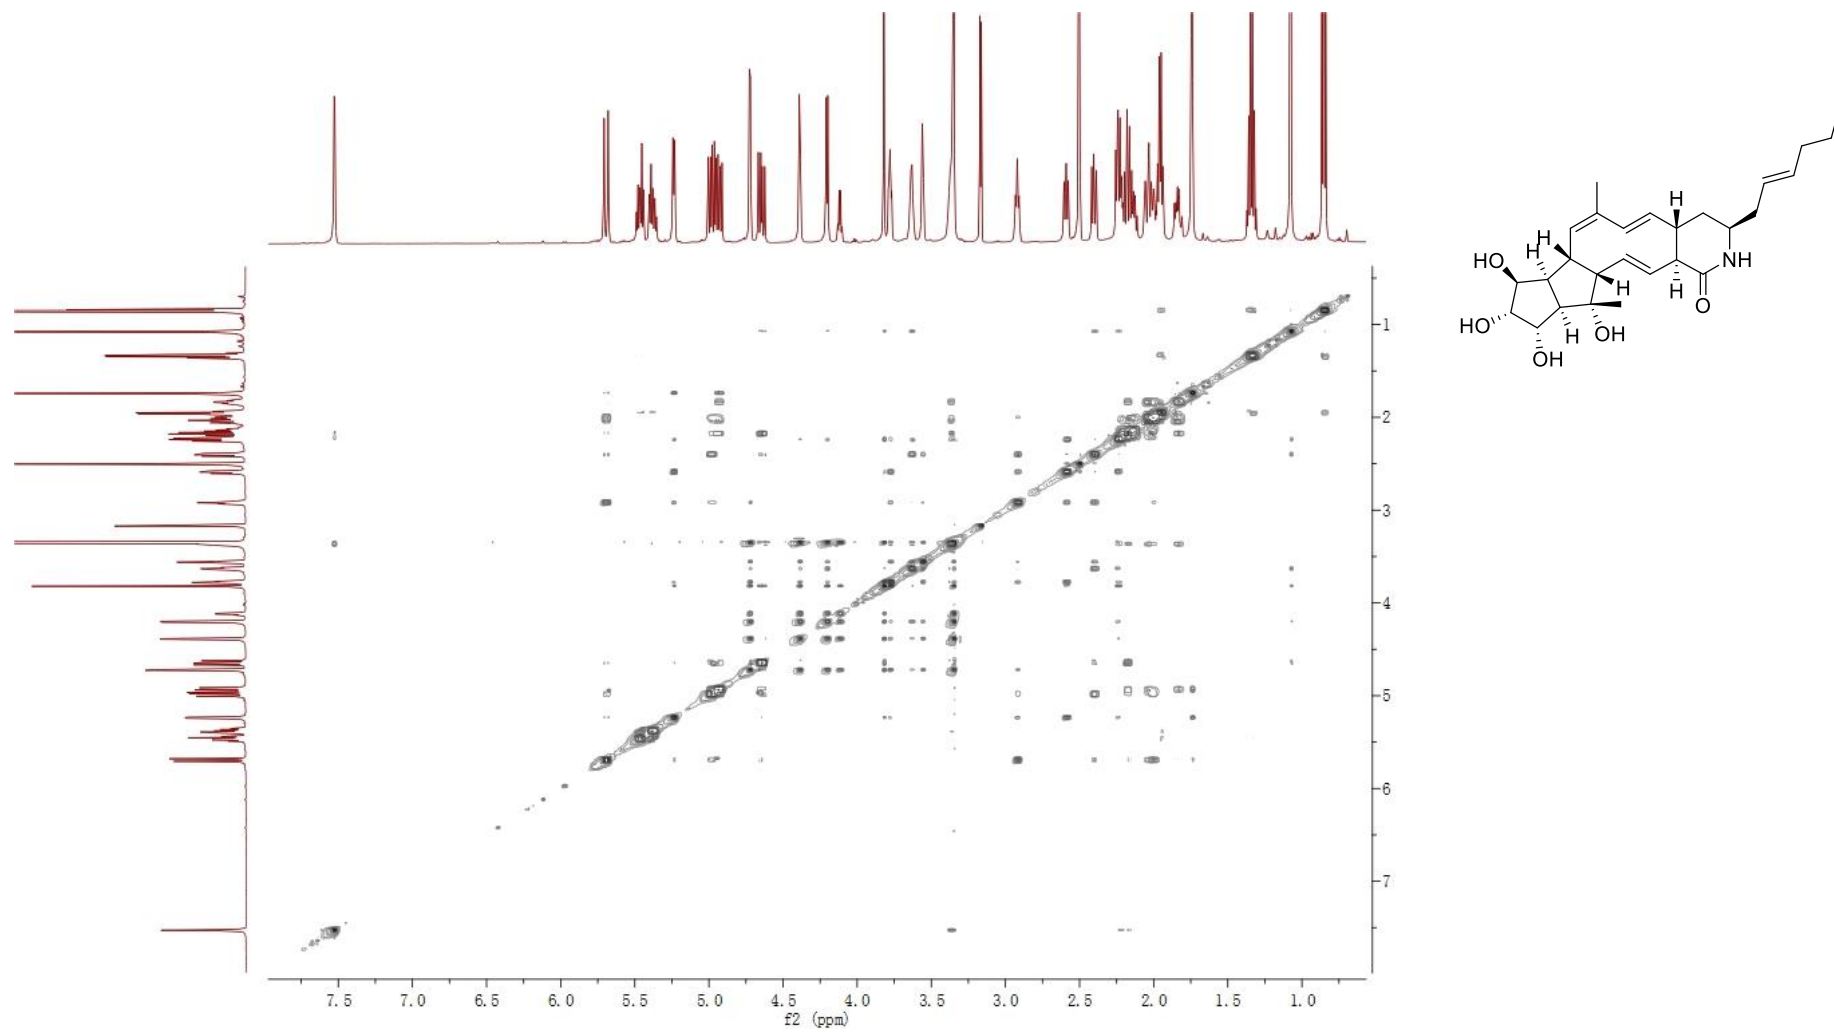

Figure S40. NOESY spectrum of compound **5**

## User Spectra

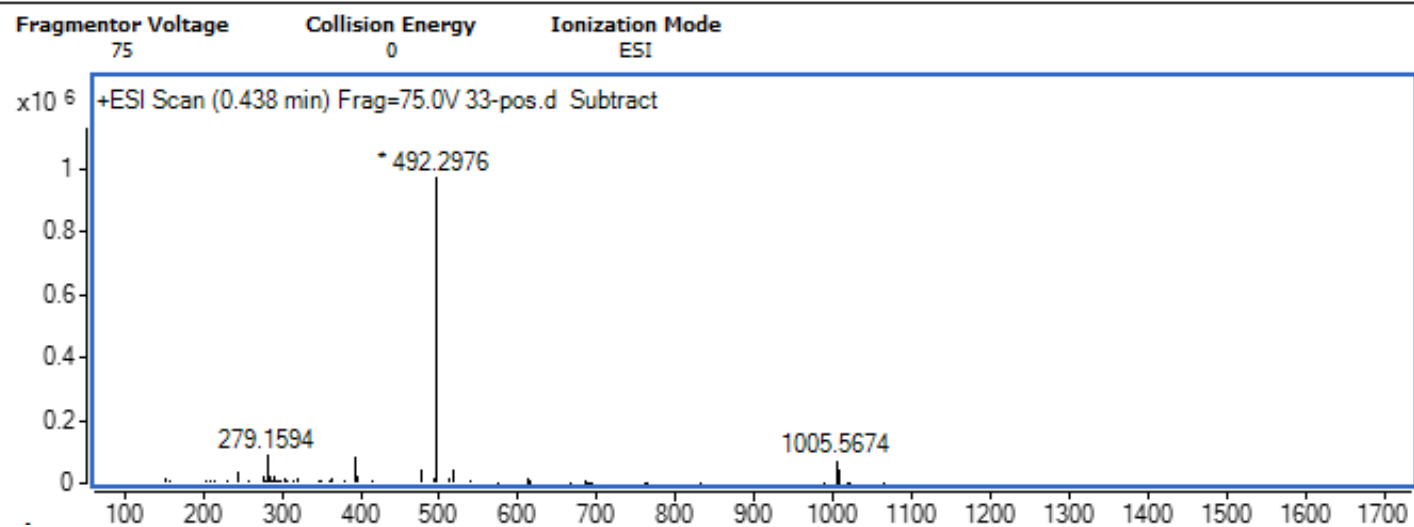

Figure S41. HRESIMS spectrum of compound **6**

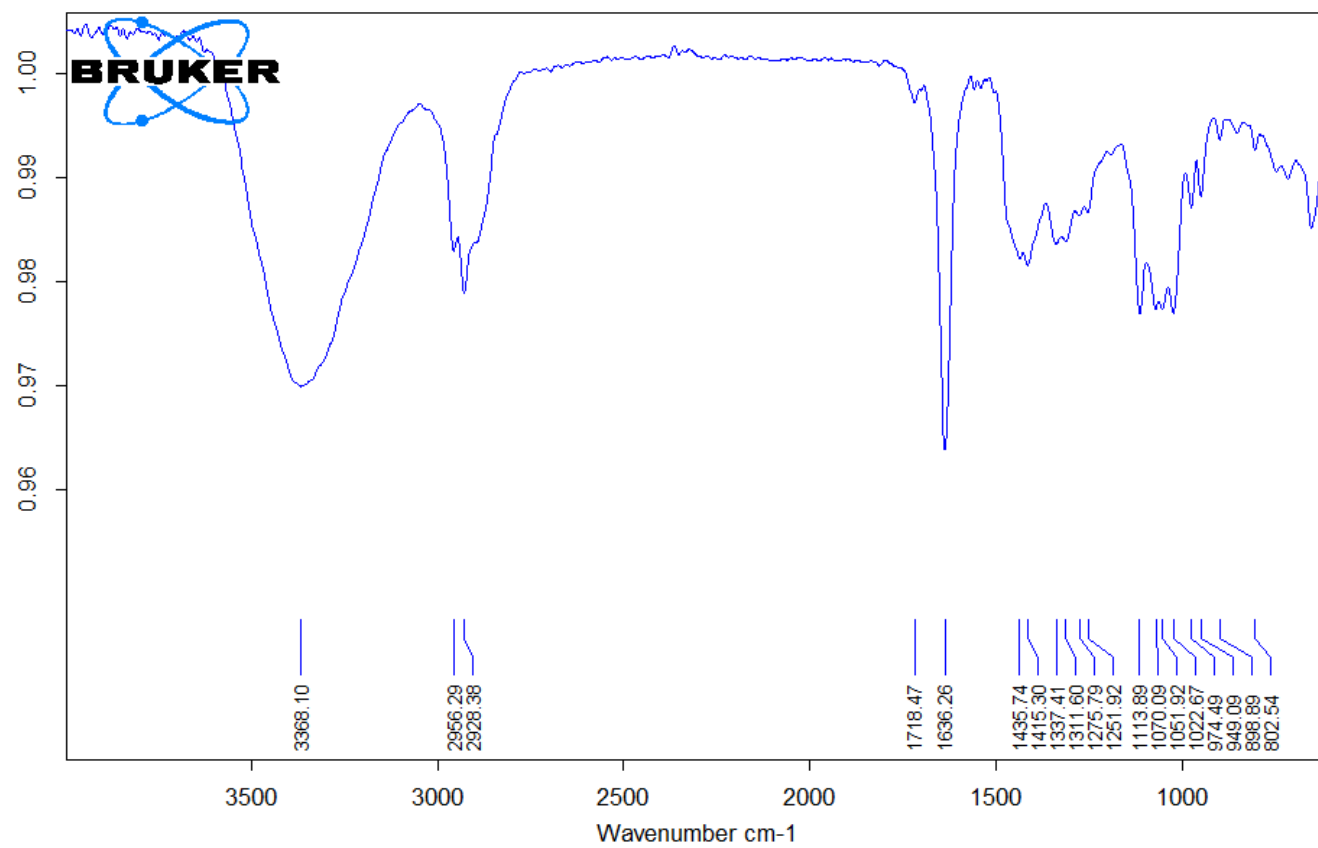

Figure S42. IR spectrum of compound **6**

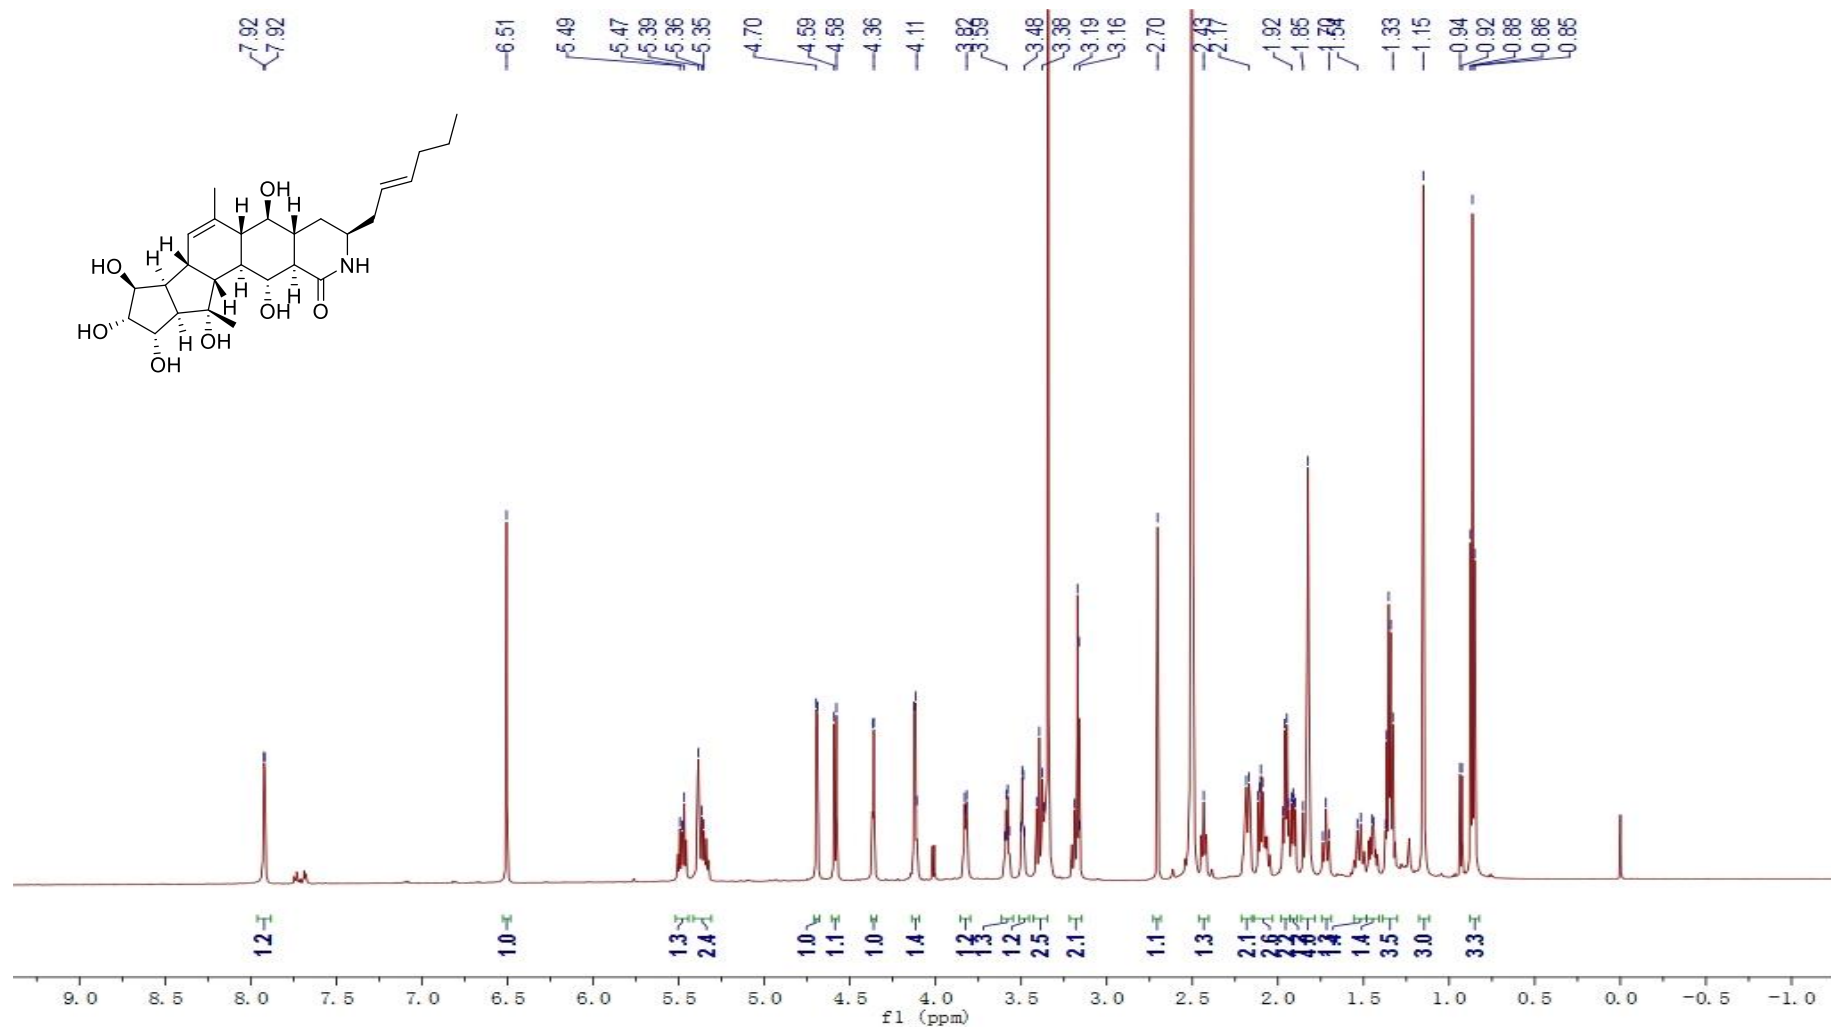

Figure S43. <sup>1</sup>H NMR (600 MHz, DMSO-*d*<sub>6</sub>) spectrum of compound 6

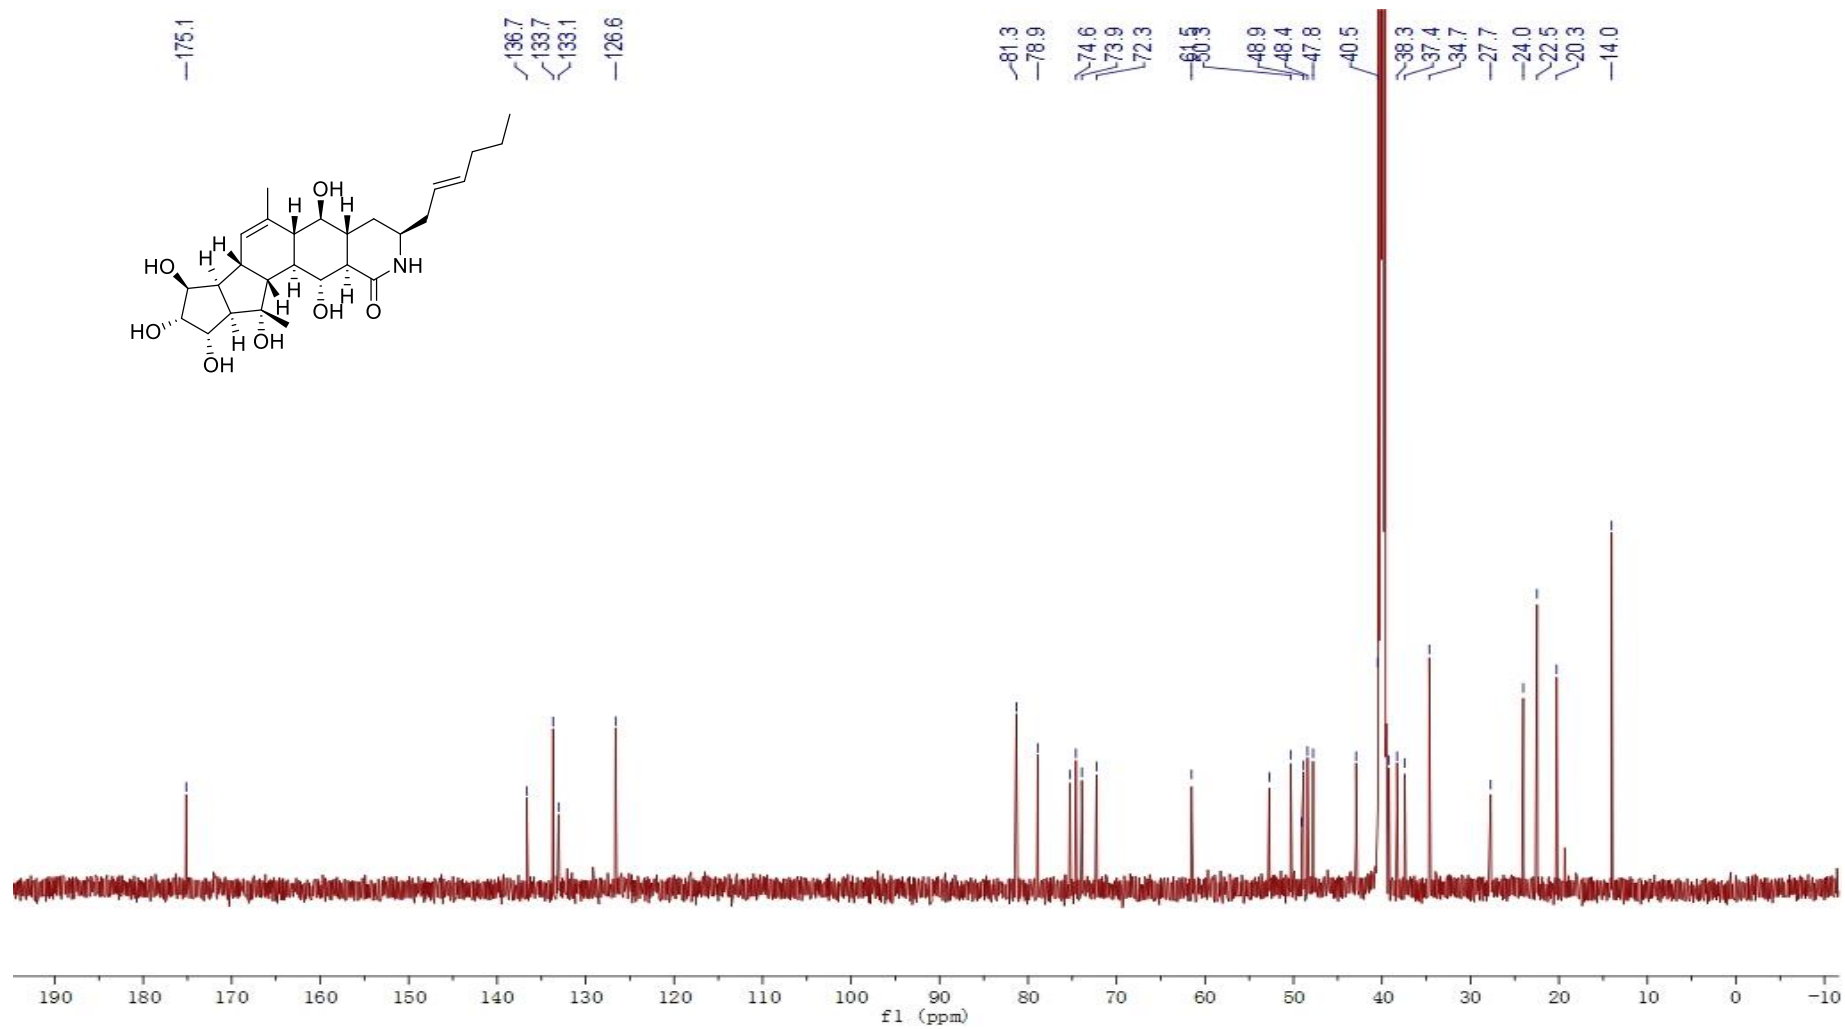

Figure S44. <sup>13</sup>C NMR (150 MHz, DMSO-*d*<sub>6</sub>) spectrum of compound 6

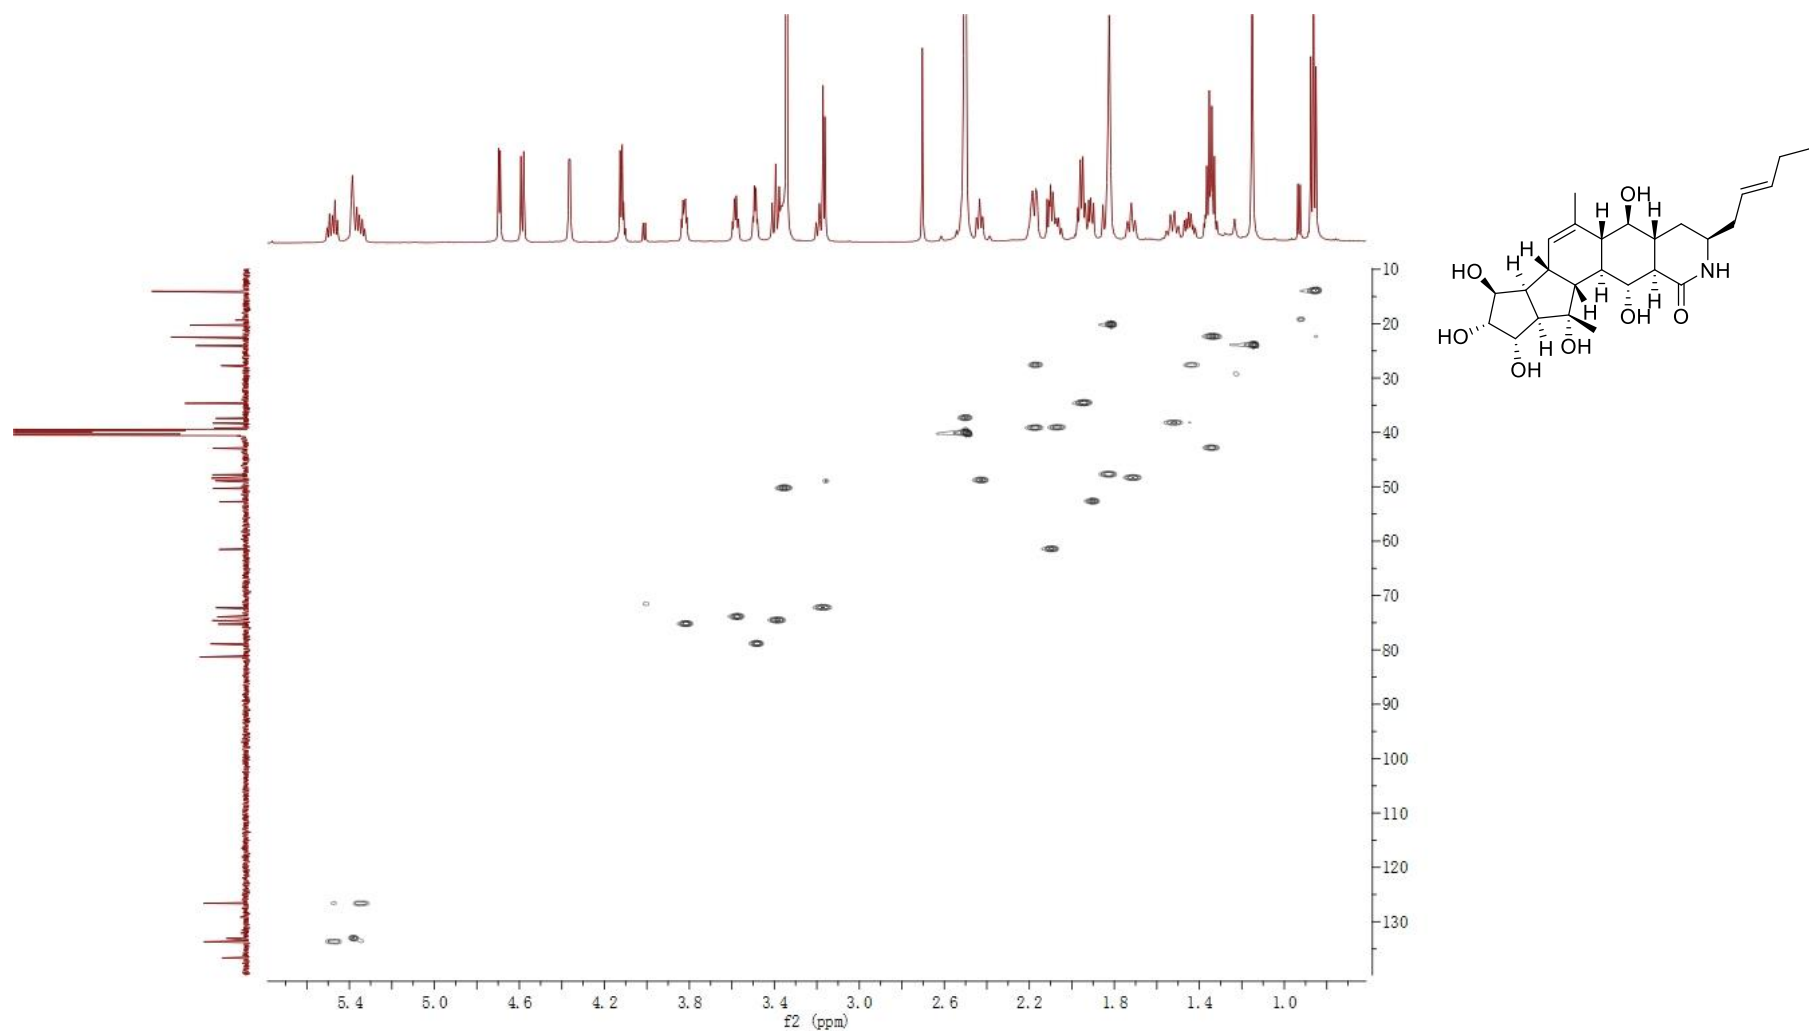

Figure S45. HSQC spectrum of compound **6**

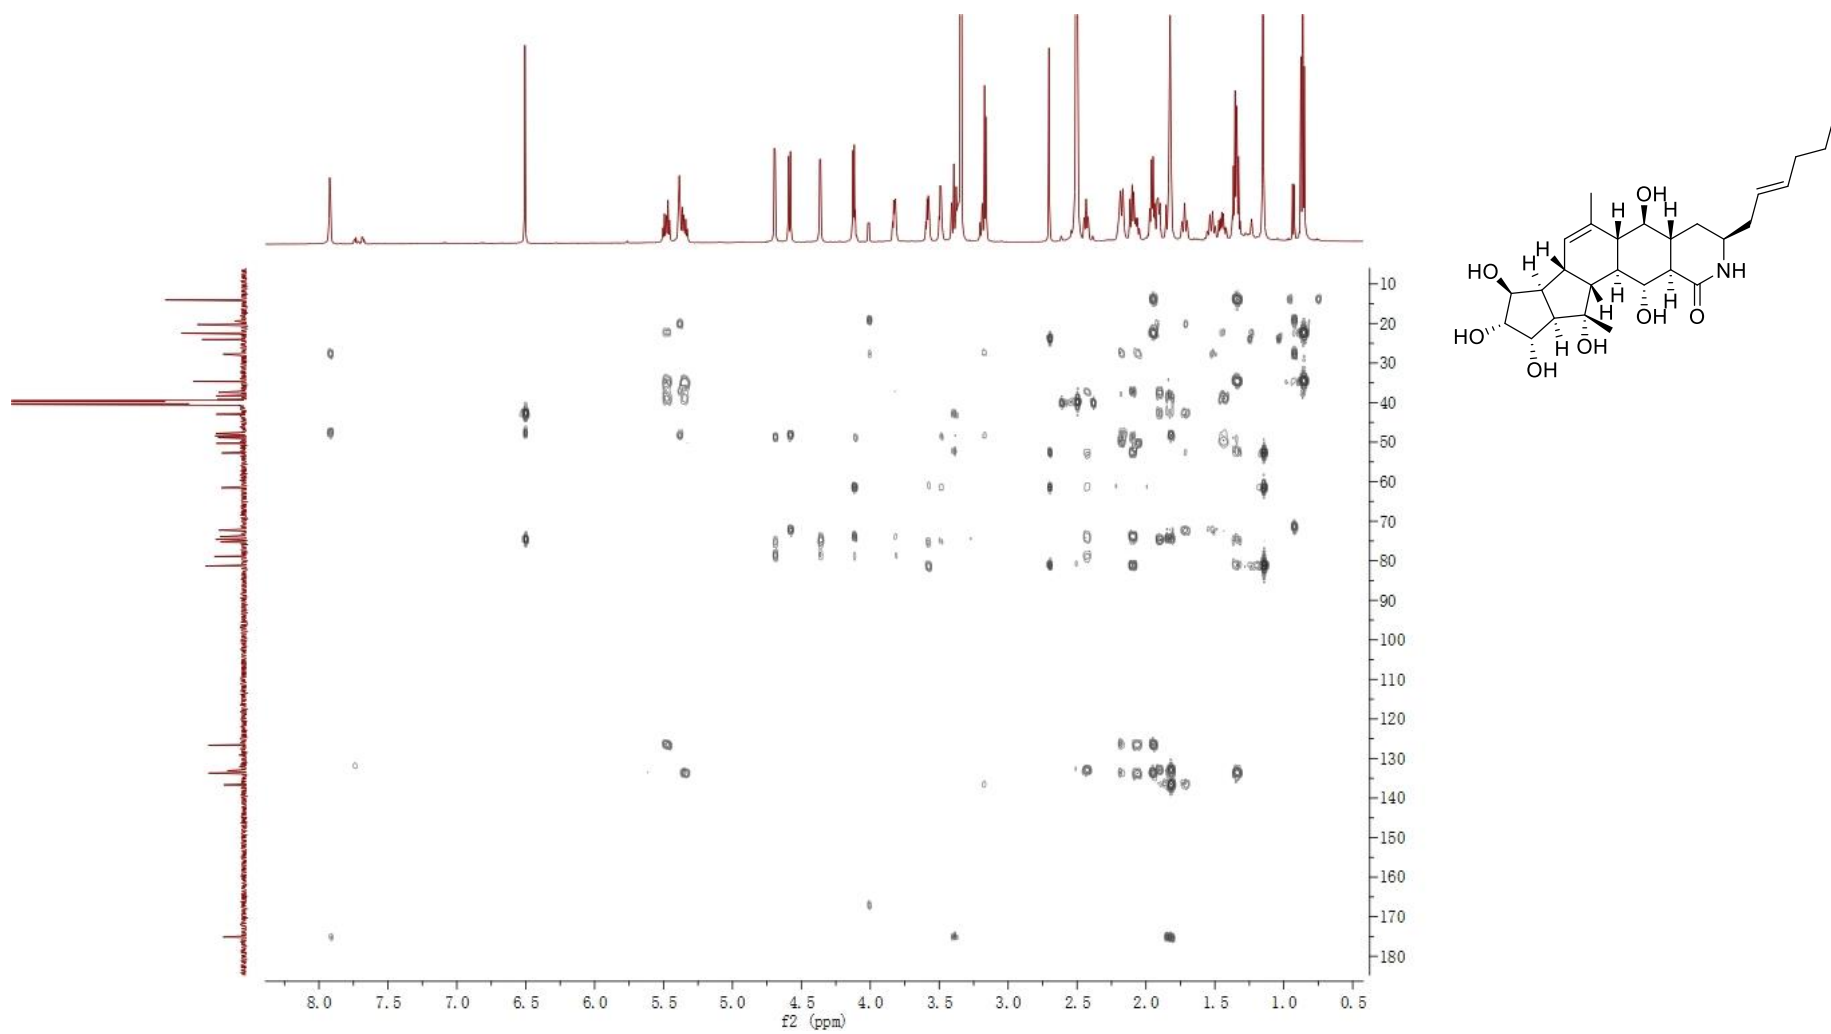

Figure S46. HMBC spectrum of compound **6**



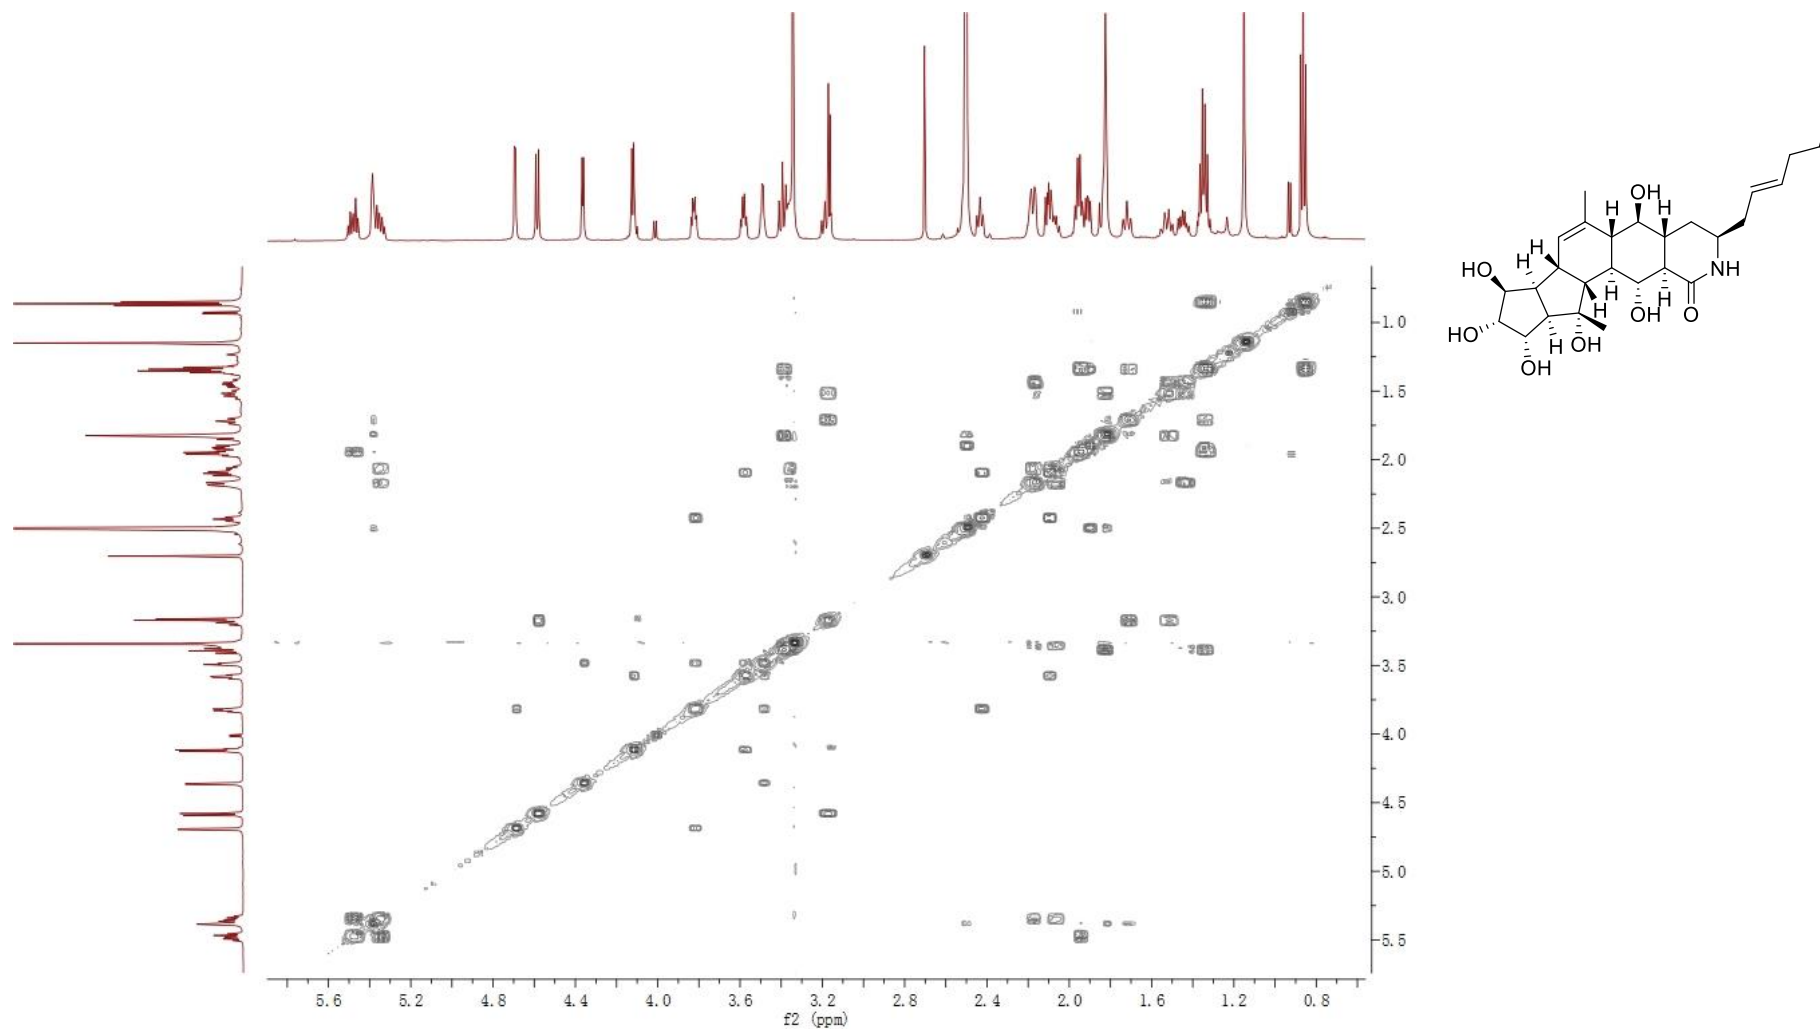

Figure S47. COSY spectrum of compound 6

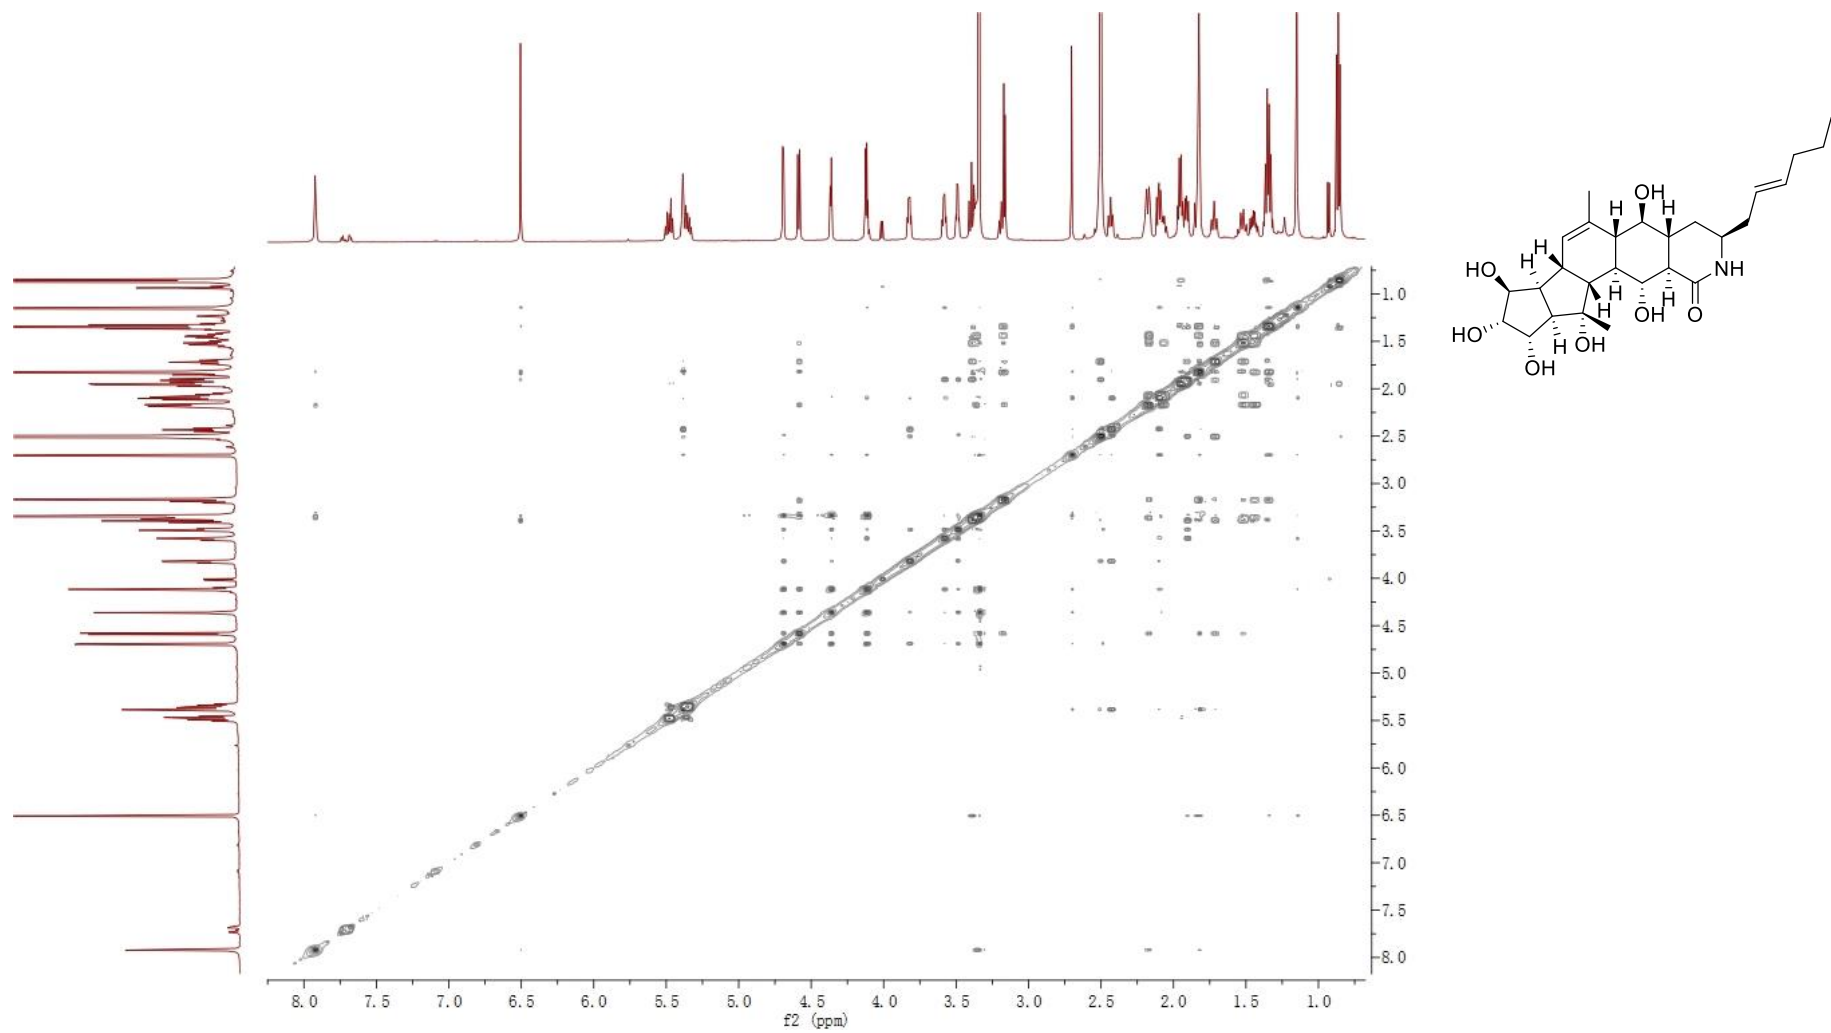

Figure S48. NOESY spectrum of compound 6

## User Spectra

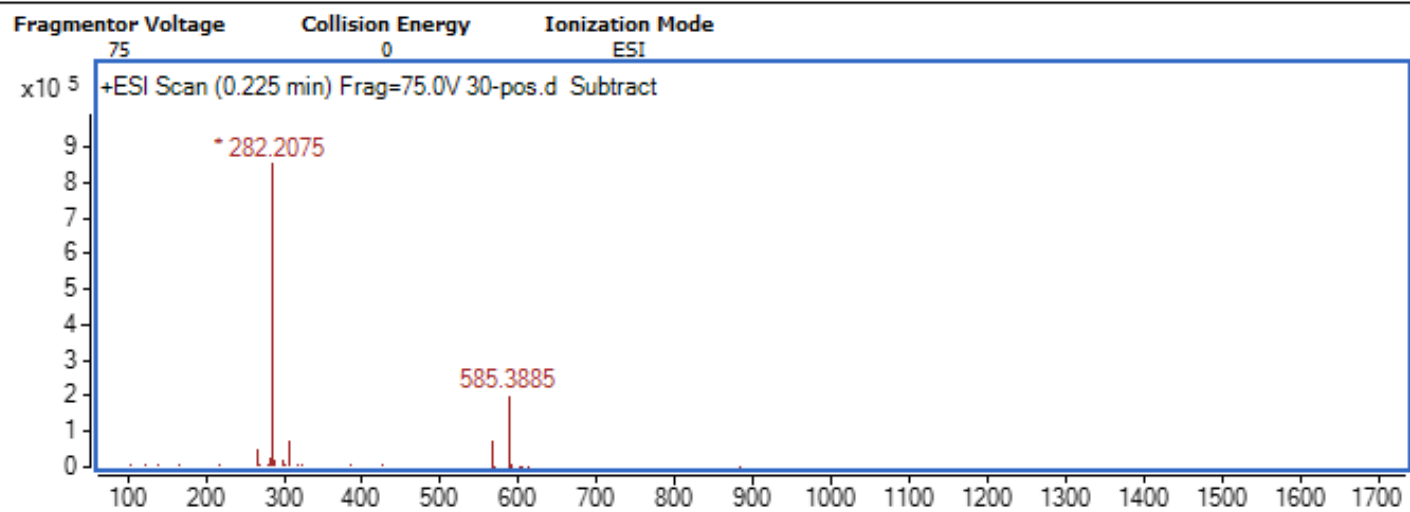

Figure S49. HRESIMS spectrum of compound **10**

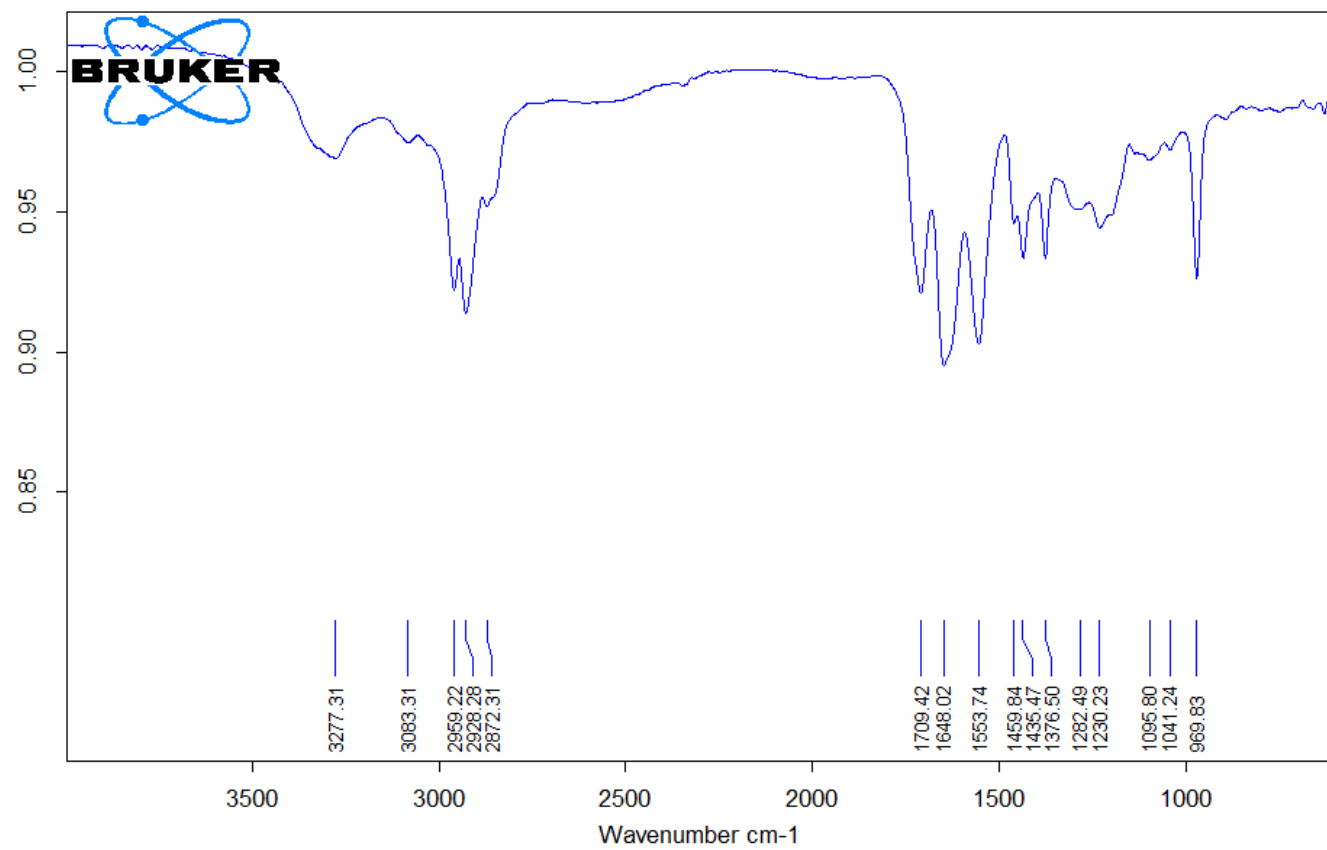

Figure S50. IR spectrum of compound **10**

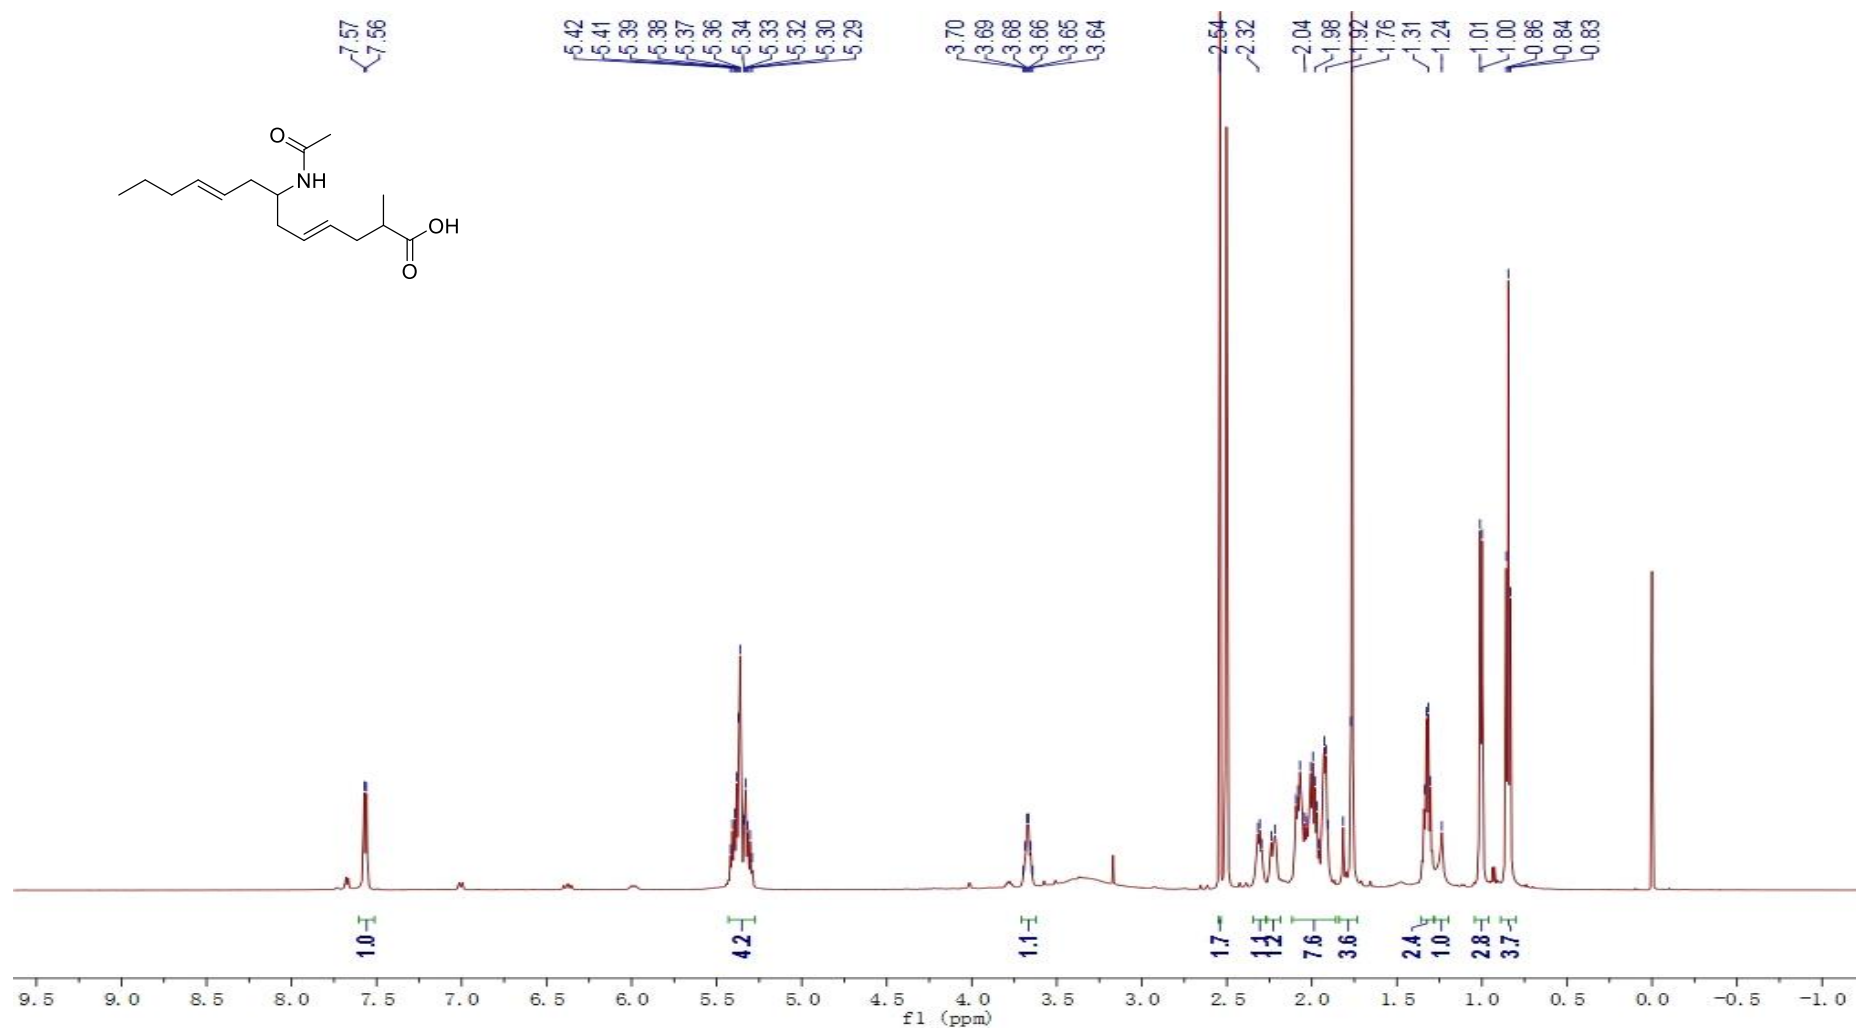

Figure S51. <sup>1</sup>H NMR (600 MHz, DMSO-*d*<sub>6</sub>) spectrum of compound **10**

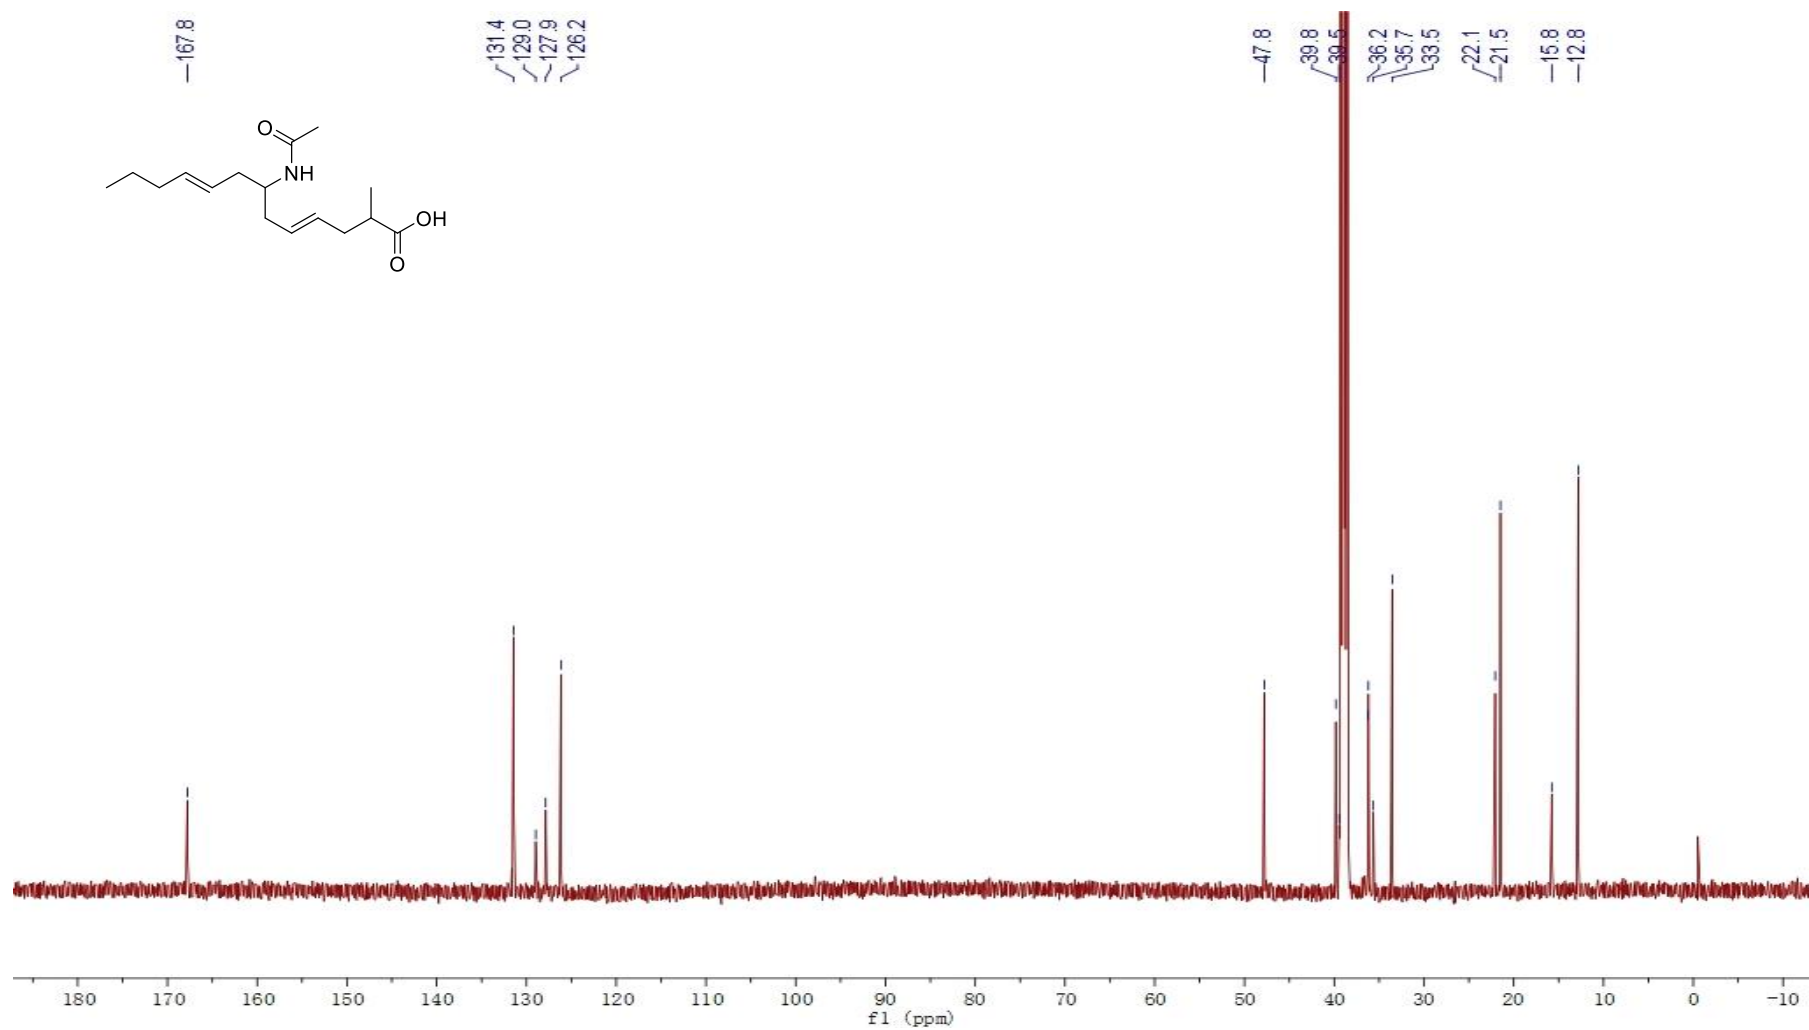

Figure S52. <sup>13</sup>C NMR (150 MHz, DMSO-*d*<sub>6</sub>) spectrum of compound **10**

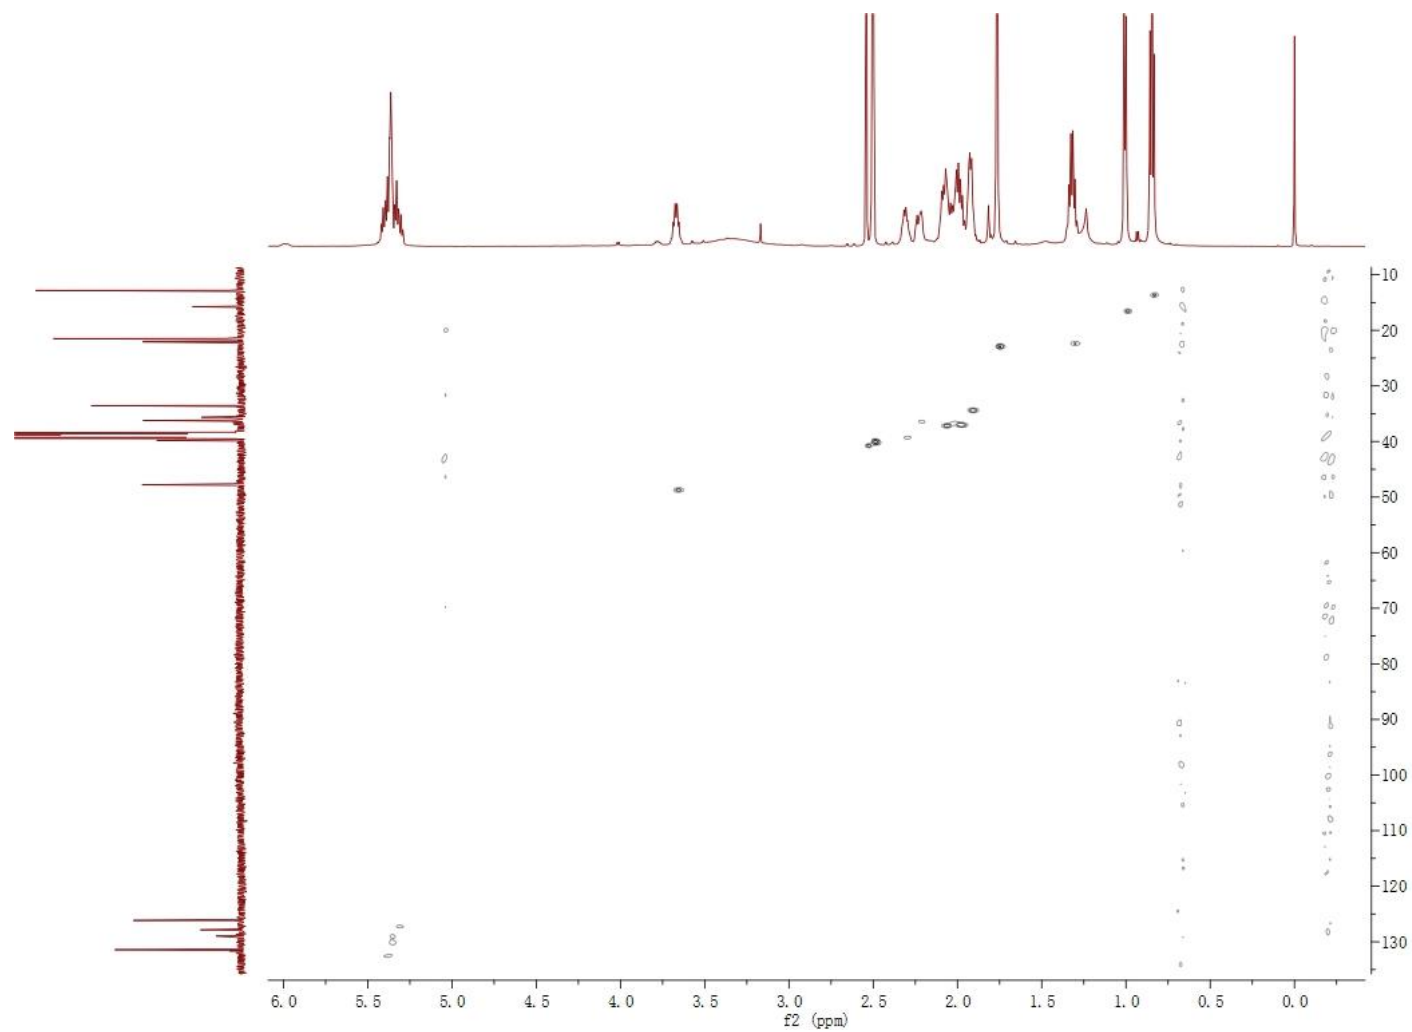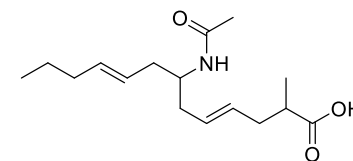

Figure S53. HSQC spectrum of compound **10**

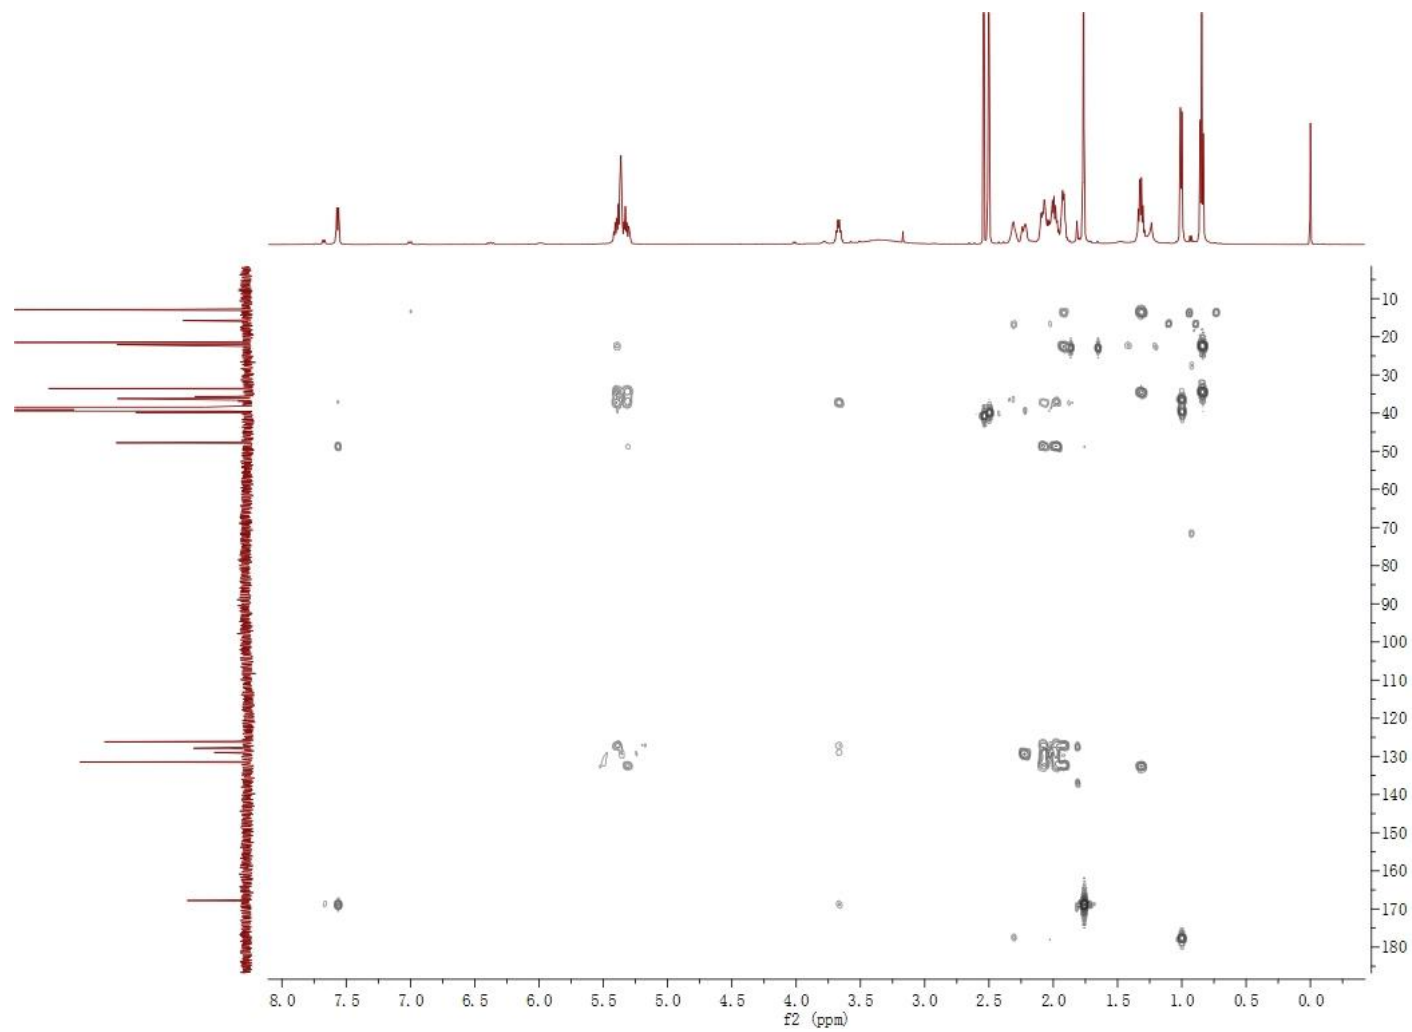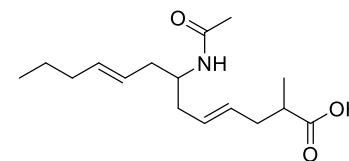

Figure S54. HMBC spectrum of compound **10**
